# Supplementary material for: Evaluation of Monte Carlo tools for high energy atmospheric physics II: relativistic runaway electron avalanches
Source: Copernicus journal article supplement (doi:10.5194/gmd-2018-119), 2018-06-14
Supplement: Supplementary file 2 [file gmd-2018-119-supplement.zip]

Archive with 165 entries (142 files):
- HEAP2_supplementary_material.pdf
- geant4_codes/
- geant4_codes/RREA_characteristics/
- geant4_codes/RREA_characteristics/GEANT4_cluster/
- geant4_codes/RREA_characteristics/GEANT4_cluster/code/
- geant4_codes/RREA_characteristics/GEANT4_cluster/code/build/
- geant4_codes/RREA_characteristics/GEANT4_cluster/code/build/g4_script_auto_mpi.py
- geant4_codes/RREA_characteristics/GEANT4_cluster/code/build/g4_script_auto_mpi_local.py
- geant4_codes/RREA_characteristics/GEANT4_cluster/code/build/output/
- geant4_codes/RREA_characteristics/GEANT4_cluster/code/build/output/notempty
- geant4_codes/RREA_characteristics/GEANT4_cluster/code/build/python_job_apc.sh
- geant4_codes/RREA_characteristics/GEANT4_cluster/code/build/python_job_fram.sh
- geant4_codes/RREA_characteristics/GEANT4_cluster/code/build/python_job_hexagon.sh
- geant4_codes/RREA_characteristics/GEANT4_cluster/code/build/vis.mac
- geant4_codes/RREA_characteristics/GEANT4_cluster/code/process_on_fram.py
- geant4_codes/RREA_characteristics/GEANT4_cluster/code/src/
- geant4_codes/RREA_characteristics/GEANT4_cluster/code/src/Base.cc
- geant4_codes/RREA_characteristics/GEANT4_cluster/code/src/CMakeLists.txt
- geant4_codes/RREA_characteristics/GEANT4_cluster/code/src/MacroTesting.mac
- geant4_codes/RREA_characteristics/GEANT4_cluster/code/src/data/
- geant4_codes/RREA_characteristics/GEANT4_cluster/code/src/data/density_profile
- geant4_codes/RREA_characteristics/GEANT4_cluster/code/src/include/
- geant4_codes/RREA_characteristics/GEANT4_cluster/code/src/include/BaseAnalysisManager.hh
- geant4_codes/RREA_characteristics/GEANT4_cluster/code/src/include/BaseDetectorConstruction.hh
- geant4_codes/RREA_characteristics/GEANT4_cluster/code/src/include/BaseEventAction.hh
- geant4_codes/RREA_characteristics/GEANT4_cluster/code/src/include/BasePhysicsList.hh
- geant4_codes/RREA_characteristics/GEANT4_cluster/code/src/include/BasePrimaryGeneratorAction.hh
- geant4_codes/RREA_characteristics/GEANT4_cluster/code/src/include/BaseRunAction.hh
- geant4_codes/RREA_characteristics/GEANT4_cluster/code/src/include/BaseSteppingAction.hh
- geant4_codes/RREA_characteristics/GEANT4_cluster/code/src/include/BaseTrackingAction.hh
- geant4_codes/RREA_characteristics/GEANT4_cluster/code/src/include/G4ElectronCapture.hh
- geant4_codes/RREA_characteristics/GEANT4_cluster/code/src/include/G4EmStandardPhysics_option1_dr.hh
- geant4_codes/RREA_characteristics/GEANT4_cluster/code/src/include/G4EmStandardPhysics_option4_dr.hh
- geant4_codes/RREA_characteristics/GEANT4_cluster/code/src/include/G4ExactUniEFStepper.hh
- geant4_codes/RREA_characteristics/GEANT4_cluster/code/src/include/Settings.hh
- geant4_codes/RREA_characteristics/GEANT4_cluster/code/src/include/StepMax.hh
- geant4_codes/RREA_characteristics/GEANT4_cluster/code/src/src/
- geant4_codes/RREA_characteristics/GEANT4_cluster/code/src/src/BaseAnalysisManager.cc
- geant4_codes/RREA_characteristics/GEANT4_cluster/code/src/src/BaseDetectorConstruction.cc
- geant4_codes/RREA_characteristics/GEANT4_cluster/code/src/src/BaseEventAction.cc
- geant4_codes/RREA_characteristics/GEANT4_cluster/code/src/src/BasePhysicsList.cc
- geant4_codes/RREA_characteristics/GEANT4_cluster/code/src/src/BasePrimaryGeneratorAction.cc
- geant4_codes/RREA_characteristics/GEANT4_cluster/code/src/src/BaseRunAction.cc
- geant4_codes/RREA_characteristics/GEANT4_cluster/code/src/src/BaseSteppingAction.cc
- geant4_codes/RREA_characteristics/GEANT4_cluster/code/src/src/BaseTrackingAction.cc
- geant4_codes/RREA_characteristics/GEANT4_cluster/code/src/src/G4EmStandardPhysics_option1_dr.cc
- geant4_codes/RREA_characteristics/GEANT4_cluster/code/src/src/G4EmStandardPhysics_option4_dr.cc
- geant4_codes/RREA_characteristics/GEANT4_cluster/code/src/src/G4ExactUniEFStepper.cc
- geant4_codes/RREA_characteristics/GEANT4_cluster/code/src/src/Settings.cc
- geant4_codes/RREA_characteristics/GEANT4_cluster/code/src/src/StepMax.cc
- geant4_codes/RREA_characteristics/GEANT4_cluster/code/src/vis.mac
- geant4_codes/RREA_characteristics/GEANT4_cluster/documents/
- geant4_codes/RREA_characteristics/GEANT4_cluster/documents/check_max_acc_step.m
- geant4_codes/RREA_characteristics/GEANT4_cluster/documents/compa_O1_O4.png
- geant4_codes/RREA_characteristics/GEANT4_cluster/documents/compa_O1_O4_opposite.png
- geant4_codes/RREA_characteristics/GEANT4_cluster/documents/fuse_data_RREA.py
- geant4_codes/RREA_characteristics/GEANT4_cluster/documents/matlab_build_pcolor.m
- geant4_codes/RREA_characteristics/GEANT4_cluster/documents/parameters_effects.mlx
- geant4_codes/RREA_characteristics/GEANT4_cluster/documents/parameters_effects.pdf
- geant4_codes/RREA_characteristics/GEANT4_cluster/documents/proba_O1-opposite.png
- geant4_codes/RREA_characteristics/GEANT4_cluster/documents/proba_O1.png
- geant4_codes/RREA_characteristics/GEANT4_cluster/documents/proba_O4-opposite.png
- geant4_codes/RREA_characteristics/GEANT4_cluster/documents/proba_O4.png
- geant4_codes/RREA_characteristics/GEANT4_cluster/documents/proba_slope_Efield.fig
- geant4_codes/RREA_characteristics/GEANT4_cluster/documents/proba_slope_Efield.png
- geant4_codes/RREA_characteristics/GEANT4_cluster/documents/proba_slope_energy.fig
- geant4_codes/RREA_characteristics/GEANT4_cluster/documents/proba_slope_energy.png
- geant4_codes/RREA_characteristics/GEANT4_cluster/plot_RREA_photon_spectrum.m
- geant4_codes/RREA_characteristics/GEANT4_cluster/test_methods.m
- geant4_codes/RREA_characteristics/matlab_codes/
- geant4_codes/RREA_characteristics/matlab_codes/GEANT4_analyse/
- geant4_codes/RREA_characteristics/matlab_codes/GEANT4_analyse/findX.m
- geant4_codes/RREA_characteristics/matlab_codes/GEANT4_analyse/friction_curve
- geant4_codes/RREA_characteristics/matlab_codes/GEANT4_analyse/plot_average_energies_14e5_models_thresholds.m
- geant4_codes/RREA_characteristics/matlab_codes/GEANT4_analyse/plot_mult_factor.m
- geant4_codes/RREA_characteristics/matlab_codes/GEANT4_analyse/plots/
- geant4_codes/RREA_characteristics/matlab_codes/GEANT4_analyse/plots/multFact_vs_Zdistance.fig
- geant4_codes/RREA_characteristics/matlab_codes/GEANT4_analyse/plots/multFact_vs_Zdistance.png
- geant4_codes/RREA_characteristics/matlab_codes/GEANT4_analyse/plots/multFact_vs_time.png
- geant4_codes/RREA_characteristics/matlab_codes/GEANT4_analyse/quick_test.m
- geant4_codes/RREA_characteristics/matlab_codes/create_matlab_structure.m
- geant4_codes/RREA_characteristics/matlab_codes/electron_distance.m
- geant4_codes/RREA_characteristics/matlab_codes/electron_distance_extended.m
- geant4_codes/RREA_characteristics/matlab_codes/electron_time.m
- geant4_codes/RREA_characteristics/matlab_codes/photon_distance.m
- geant4_codes/avalanche_probabilities_prob/
- geant4_codes/avalanche_probabilities_prob/GEANT4/
- geant4_codes/avalanche_probabilities_prob/GEANT4/check_max_acc_step.m
- geant4_codes/avalanche_probabilities_prob/GEANT4/code/
- geant4_codes/avalanche_probabilities_prob/GEANT4/code/build/
- geant4_codes/avalanche_probabilities_prob/GEANT4/code/build/MacroTesting.mac
- geant4_codes/avalanche_probabilities_prob/GEANT4/code/build/Makefile
- geant4_codes/avalanche_probabilities_prob/GEANT4/code/build/g4_script_auto_mpi.py
- geant4_codes/avalanche_probabilities_prob/GEANT4/code/build/g4_script_auto_mt.py
- geant4_codes/avalanche_probabilities_prob/GEANT4/code/build/python_job.sh
- geant4_codes/avalanche_probabilities_prob/GEANT4/code/build/python_job_fram.sh
- geant4_codes/avalanche_probabilities_prob/GEANT4/code/build/vis.mac
- geant4_codes/avalanche_probabilities_prob/GEANT4/code/src/
- geant4_codes/avalanche_probabilities_prob/GEANT4/code/src/.DS_Store
- geant4_codes/avalanche_probabilities_prob/GEANT4/code/src/BaseAV.cc
- geant4_codes/avalanche_probabilities_prob/GEANT4/code/src/CMakeLists.txt
- geant4_codes/avalanche_probabilities_prob/GEANT4/code/src/CMakeLists.txt~
- geant4_codes/avalanche_probabilities_prob/GEANT4/code/src/MacroTesting.mac
- geant4_codes/avalanche_probabilities_prob/GEANT4/code/src/include/
- geant4_codes/avalanche_probabilities_prob/GEANT4/code/src/include/BaseAnalysisManager.hh
- geant4_codes/avalanche_probabilities_prob/GEANT4/code/src/include/BaseDetectorConstruction.hh
- geant4_codes/avalanche_probabilities_prob/GEANT4/code/src/include/BaseEventAction.hh
- geant4_codes/avalanche_probabilities_prob/GEANT4/code/src/include/BasePhysicsList.hh
- geant4_codes/avalanche_probabilities_prob/GEANT4/code/src/include/BasePrimaryGeneratorAction.hh
- geant4_codes/avalanche_probabilities_prob/GEANT4/code/src/include/BaseRunAction.hh
- geant4_codes/avalanche_probabilities_prob/GEANT4/code/src/include/BaseStackingAction.hh
- geant4_codes/avalanche_probabilities_prob/GEANT4/code/src/include/BaseSteppingAction.hh
- geant4_codes/avalanche_probabilities_prob/GEANT4/code/src/include/BaseTrackingAction.hh
- geant4_codes/avalanche_probabilities_prob/GEANT4/code/src/include/Settings.hh
- geant4_codes/avalanche_probabilities_prob/GEANT4/code/src/include/StepMax.hh
- geant4_codes/avalanche_probabilities_prob/GEANT4/code/src/src/
- geant4_codes/avalanche_probabilities_prob/GEANT4/code/src/src/BaseAnalysisManager.cc
- geant4_codes/avalanche_probabilities_prob/GEANT4/code/src/src/BaseDetectorConstruction.cc
- geant4_codes/avalanche_probabilities_prob/GEANT4/code/src/src/BaseEventAction.cc
- geant4_codes/avalanche_probabilities_prob/GEANT4/code/src/src/BasePhysicsList.cc
- geant4_codes/avalanche_probabilities_prob/GEANT4/code/src/src/BasePrimaryGeneratorAction.cc
- geant4_codes/avalanche_probabilities_prob/GEANT4/code/src/src/BaseRunAction.cc
- geant4_codes/avalanche_probabilities_prob/GEANT4/code/src/src/BaseStackingAction.cc
- geant4_codes/avalanche_probabilities_prob/GEANT4/code/src/src/BaseSteppingAction.cc
- geant4_codes/avalanche_probabilities_prob/GEANT4/code/src/src/BaseTrackingAction.cc
- geant4_codes/avalanche_probabilities_prob/GEANT4/code/src/src/Settings.cc
- geant4_codes/avalanche_probabilities_prob/GEANT4/code/src/src/StepMax.cc
- geant4_codes/avalanche_probabilities_prob/GEANT4/code/src/vis.mac
- geant4_codes/avalanche_probabilities_prob/GEANT4/compa_O1_O4.png
- geant4_codes/avalanche_probabilities_prob/GEANT4/compa_O1_O4_opposite.png
- geant4_codes/avalanche_probabilities_prob/GEANT4/data/
- geant4_codes/avalanche_probabilities_prob/GEANT4/data/fused.txt
- geant4_codes/avalanche_probabilities_prob/GEANT4/data/output.zip
- geant4_codes/avalanche_probabilities_prob/GEANT4/data/output_g4_high_stats.zip
- geant4_codes/avalanche_probabilities_prob/GEANT4/matlab_build_pcolor.m
- geant4_codes/avalanche_probabilities_prob/GEANT4/parameters_effects.mlx
- geant4_codes/avalanche_probabilities_prob/GEANT4/proba_O1-opposite.png
- geant4_codes/avalanche_probabilities_prob/GEANT4/proba_O1.png
- geant4_codes/avalanche_probabilities_prob/GEANT4/proba_O4-opposite.png
- geant4_codes/avalanche_probabilities_prob/GEANT4/proba_O4.png
- geant4_codes/readme
- geant4_codes/readme~
- matlab_processing/
- matlab_processing/comp_chanr.m
- matlab_processing/create_matlab_structure_G4O1.m
- matlab_processing/create_matlab_structure_G4O1_1cm.m
- matlab_processing/create_matlab_structure_G4O4.m
- matlab_processing/create_matlab_structure_G4O4_1cm.m
- matlab_processing/create_matlab_structure_GRRR.m
- matlab_processing/create_matlab_structure_REAM.m
- matlab_processing/electron_distance.m
- matlab_processing/generate_plot_RREA_mean_velocity.m
- matlab_processing/generate_plot_RREA_mean_velocity_at_steady_state.m
- matlab_processing/generate_plot_avalanche_length_SpaceRecord.m
- matlab_processing/generate_plot_avalanche_times_TimeRecord_V2.m
- matlab_processing/generate_plot_mult_fact_SpaceRecord_code_compa.m
- matlab_processing/generate_plot_mult_fact_TimeRecord_code_by_code.m
- matlab_processing/generate_plot_spectra_REAM_evolution_to_ss.m
- matlab_processing/generate_plot_spectra_at_distances_of_stopTimes.m
- matlab_processing/generate_plot_spectra_at_stop_times.m
- matlab_processing/generate_plot_time_to_steady_state.m
- matlab_processing/matlab_build_comparison.m
- matlab_processing/photon_electron_ratio.m
- matlab_processing/photon_electron_ratio_code_by_code.m
- matlab_processing/photon_electron_ratio_code_compa.m
