# Supplementary material for: Evaluation of Monte Carlo tools for high energy atmospheric physics II: relativistic runaway electron avalanches
Source: Copernicus journal article supplement (doi:10.5194/gmd-2018-119), 2018-06-14
Supplement: Supplementary file 2 [file gmd-2018-119-supplement.zip › geant4_codes/avalanche_probabilities_prob/GEANT4/code/build/g4_script_auto_mpi.py]

#!/usr/bin/env python2


from mpi4py import MPI
from subprocess import call
from functools import partial
from multiprocessing.dummy import Pool
import numpy as np
import random
import time
import sys


def enum(*sequential, **named):
    enums = dict(zip(sequential, range(len(sequential))), **named)
    return type('Enum', (), enums)


# Initializations and preliminaries
comm = MPI.COMM_WORLD   # get MPI communicator object
size = comm.Get_size()       # total number of processes
rank = comm.Get_rank()       # rank of this process
status = MPI.Status()   # get MPI status object

print(rank)
print(size)

# define the commands to be run in parallel
    
nr_particles = 1
nr_1MEV_elec_required = 20
list_primary_energy = [0.06]  # MeV
list_physicsList= ['O1','O4']
#list_physics= ['LIV','O4','O1','PEN']
list_Efields = [12.e5] # V/m
list_direction=["+1"]
max_step_list = [10., 1., 0.1, 0.01, 0.001, 0.0001, 0.00001] # mm

nb_runs = 1000

commands=[]

excecutable = './BaseAV'
rand_seed = 1

for direction in list_direction:
    for physicsList in list_physicsList:
        for primary_energy in list_primary_energy:
            for field in list_Efields:
                for max_step in max_step_list:
                    for _ in range(nb_runs):
                        commands.append(excecutable+' '+str(physicsList)+' '+str(nr_particles)+' '+str(field)+' '+str(primary_energy)+' '+str(nr_1MEV_elec_required)+' '+str(rand_seed)+' '+str(direction)+' '+str(max_step))
                        rand_seed=rand_seed+1


# Define MPI message tags
tags = enum('READY', 'DONE', 'EXIT', 'START')


if rank == 0:
    # Master process executes code below
    tasks = commands
    task_index = 0
    num_workers = size - 1
    closed_workers = 0
    print("Master starting with %d workers" % num_workers)
    while closed_workers < num_workers:
        data = comm.recv(source=MPI.ANY_SOURCE, tag=MPI.ANY_TAG, status=status)
        source = status.Get_source()
        tag = status.Get_tag()
        if tag == tags.READY:
            # Worker is ready, so send it a task
            if task_index < len(tasks):
                comm.send(tasks[task_index], dest=source, tag=tags.START)
                print("Sending task %d to worker %d" % (task_index, source))
                task_index += 1
            else:
                comm.send(None, dest=source, tag=tags.EXIT)
        elif tag == tags.DONE:
            results = data
            print("Got data from worker %d" % source)
        elif tag == tags.EXIT:
            print("Worker %d exited." % source)
            closed_workers += 1

    print("Master finishing")
else:
    # Worker processes execute code below
    name = MPI.Get_processor_name()
    print("I am a worker with rank %d on %s." % (rank, name))
    while True:
        comm.send(None, dest=0, tag=tags.READY)
        task = comm.recv(source=0, tag=MPI.ANY_TAG, status=status)
        tag = status.Get_tag()
        
        if tag == tags.START:
            # Do the work here
            task2=[task]
            pool = Pool(1) # to be always set to 1 for this MPI case
            for i, returncode in enumerate(pool.imap(partial(call, shell=True), task2)):
                if returncode != 0:
                    print("%d command failed: %d" % (i, returncode))
            comm.send(returncode, dest=0, tag=tags.DONE)
        elif tag == tags.EXIT:
            break

comm.send(None, dest=0, tag=tags.EXIT)
