# Supplementary material for: Evaluation of Monte Carlo tools for high energy atmospheric physics II: relativistic runaway electron avalanches
Source: Copernicus journal article supplement (doi:10.5194/gmd-2018-119), 2018-06-14
Supplement: Supplementary file 2 [file gmd-2018-119-supplement.zip › geant4_codes/avalanche_probabilities_prob/GEANT4/code/build/Makefile]

# CMAKE generated file: DO NOT EDIT!
# Generated by "Unix Makefiles" Generator, CMake Version 3.9

# Default target executed when no arguments are given to make.
default_target: all

.PHONY : default_target

# Allow only one "make -f Makefile2" at a time, but pass parallelism.
.NOTPARALLEL:


#=============================================================================
# Special targets provided by cmake.

# Disable implicit rules so canonical targets will work.
.SUFFIXES:


# Remove some rules from gmake that .SUFFIXES does not remove.
SUFFIXES =

.SUFFIXES: .hpux_make_needs_suffix_list


# Suppress display of executed commands.
$(VERBOSE).SILENT:


# A target that is always out of date.
cmake_force:

.PHONY : cmake_force

#=============================================================================
# Set environment variables for the build.

# The shell in which to execute make rules.
SHELL = /bin/sh

# The CMake executable.
CMAKE_COMMAND = /Home/siv29/dsa030/Desktop/GEANT4/cmake/bin/cmake

# The command to remove a file.
RM = /Home/siv29/dsa030/Desktop/GEANT4/cmake/bin/cmake -E remove -f

# Escaping for special characters.
EQUALS = =

# The top-level source directory on which CMake was run.
CMAKE_SOURCE_DIR = /Home/siv29/dsa030/Desktop/GEANT4/HEAP/av_prob/GEANT4/code/src

# The top-level build directory on which CMake was run.
CMAKE_BINARY_DIR = /Home/siv29/dsa030/Desktop/GEANT4/HEAP/av_prob/GEANT4/code/build

#=============================================================================
# Targets provided globally by CMake.

# Special rule for the target install
install: preinstall
	@$(CMAKE_COMMAND) -E cmake_echo_color --switch=$(COLOR) --cyan "Install the project..."
	/Home/siv29/dsa030/Desktop/GEANT4/cmake/bin/cmake -P cmake_install.cmake
.PHONY : install

# Special rule for the target install
install/fast: preinstall/fast
	@$(CMAKE_COMMAND) -E cmake_echo_color --switch=$(COLOR) --cyan "Install the project..."
	/Home/siv29/dsa030/Desktop/GEANT4/cmake/bin/cmake -P cmake_install.cmake
.PHONY : install/fast

# Special rule for the target list_install_components
list_install_components:
	@$(CMAKE_COMMAND) -E cmake_echo_color --switch=$(COLOR) --cyan "Available install components are: \"Unspecified\""
.PHONY : list_install_components

# Special rule for the target list_install_components
list_install_components/fast: list_install_components

.PHONY : list_install_components/fast

# Special rule for the target install/strip
install/strip: preinstall
	@$(CMAKE_COMMAND) -E cmake_echo_color --switch=$(COLOR) --cyan "Installing the project stripped..."
	/Home/siv29/dsa030/Desktop/GEANT4/cmake/bin/cmake -DCMAKE_INSTALL_DO_STRIP=1 -P cmake_install.cmake
.PHONY : install/strip

# Special rule for the target install/strip
install/strip/fast: preinstall/fast
	@$(CMAKE_COMMAND) -E cmake_echo_color --switch=$(COLOR) --cyan "Installing the project stripped..."
	/Home/siv29/dsa030/Desktop/GEANT4/cmake/bin/cmake -DCMAKE_INSTALL_DO_STRIP=1 -P cmake_install.cmake
.PHONY : install/strip/fast

# Special rule for the target install/local
install/local: preinstall
	@$(CMAKE_COMMAND) -E cmake_echo_color --switch=$(COLOR) --cyan "Installing only the local directory..."
	/Home/siv29/dsa030/Desktop/GEANT4/cmake/bin/cmake -DCMAKE_INSTALL_LOCAL_ONLY=1 -P cmake_install.cmake
.PHONY : install/local

# Special rule for the target install/local
install/local/fast: preinstall/fast
	@$(CMAKE_COMMAND) -E cmake_echo_color --switch=$(COLOR) --cyan "Installing only the local directory..."
	/Home/siv29/dsa030/Desktop/GEANT4/cmake/bin/cmake -DCMAKE_INSTALL_LOCAL_ONLY=1 -P cmake_install.cmake
.PHONY : install/local/fast

# Special rule for the target edit_cache
edit_cache:
	@$(CMAKE_COMMAND) -E cmake_echo_color --switch=$(COLOR) --cyan "Running CMake cache editor..."
	/Home/siv29/dsa030/Desktop/GEANT4/cmake/bin/cmake-gui -H$(CMAKE_SOURCE_DIR) -B$(CMAKE_BINARY_DIR)
.PHONY : edit_cache

# Special rule for the target edit_cache
edit_cache/fast: edit_cache

.PHONY : edit_cache/fast

# Special rule for the target rebuild_cache
rebuild_cache:
	@$(CMAKE_COMMAND) -E cmake_echo_color --switch=$(COLOR) --cyan "Running CMake to regenerate build system..."
	/Home/siv29/dsa030/Desktop/GEANT4/cmake/bin/cmake -H$(CMAKE_SOURCE_DIR) -B$(CMAKE_BINARY_DIR)
.PHONY : rebuild_cache

# Special rule for the target rebuild_cache
rebuild_cache/fast: rebuild_cache

.PHONY : rebuild_cache/fast

# The main all target
all: cmake_check_build_system
	$(CMAKE_COMMAND) -E cmake_progress_start /Home/siv29/dsa030/Desktop/GEANT4/HEAP/av_prob/GEANT4/code/build/CMakeFiles /Home/siv29/dsa030/Desktop/GEANT4/HEAP/av_prob/GEANT4/code/build/CMakeFiles/progress.marks
	$(MAKE) -f CMakeFiles/Makefile2 all
	$(CMAKE_COMMAND) -E cmake_progress_start /Home/siv29/dsa030/Desktop/GEANT4/HEAP/av_prob/GEANT4/code/build/CMakeFiles 0
.PHONY : all

# The main clean target
clean:
	$(MAKE) -f CMakeFiles/Makefile2 clean
.PHONY : clean

# The main clean target
clean/fast: clean

.PHONY : clean/fast

# Prepare targets for installation.
preinstall: all
	$(MAKE) -f CMakeFiles/Makefile2 preinstall
.PHONY : preinstall

# Prepare targets for installation.
preinstall/fast:
	$(MAKE) -f CMakeFiles/Makefile2 preinstall
.PHONY : preinstall/fast

# clear depends
depend:
	$(CMAKE_COMMAND) -H$(CMAKE_SOURCE_DIR) -B$(CMAKE_BINARY_DIR) --check-build-system CMakeFiles/Makefile.cmake 1
.PHONY : depend

#=============================================================================
# Target rules for targets named CMakeRules

# Build rule for target.
CMakeRules: cmake_check_build_system
	$(MAKE) -f CMakeFiles/Makefile2 CMakeRules
.PHONY : CMakeRules

# fast build rule for target.
CMakeRules/fast:
	$(MAKE) -f CMakeFiles/CMakeRules.dir/build.make CMakeFiles/CMakeRules.dir/build
.PHONY : CMakeRules/fast

#=============================================================================
# Target rules for targets named BaseAV

# Build rule for target.
BaseAV: cmake_check_build_system
	$(MAKE) -f CMakeFiles/Makefile2 BaseAV
.PHONY : BaseAV

# fast build rule for target.
BaseAV/fast:
	$(MAKE) -f CMakeFiles/BaseAV.dir/build.make CMakeFiles/BaseAV.dir/build
.PHONY : BaseAV/fast

BaseAV.o: BaseAV.cc.o

.PHONY : BaseAV.o

# target to build an object file
BaseAV.cc.o:
	$(MAKE) -f CMakeFiles/BaseAV.dir/build.make CMakeFiles/BaseAV.dir/BaseAV.cc.o
.PHONY : BaseAV.cc.o

BaseAV.i: BaseAV.cc.i

.PHONY : BaseAV.i

# target to preprocess a source file
BaseAV.cc.i:
	$(MAKE) -f CMakeFiles/BaseAV.dir/build.make CMakeFiles/BaseAV.dir/BaseAV.cc.i
.PHONY : BaseAV.cc.i

BaseAV.s: BaseAV.cc.s

.PHONY : BaseAV.s

# target to generate assembly for a file
BaseAV.cc.s:
	$(MAKE) -f CMakeFiles/BaseAV.dir/build.make CMakeFiles/BaseAV.dir/BaseAV.cc.s
.PHONY : BaseAV.cc.s

src/BaseAnalysisManager.o: src/BaseAnalysisManager.cc.o

.PHONY : src/BaseAnalysisManager.o

# target to build an object file
src/BaseAnalysisManager.cc.o:
	$(MAKE) -f CMakeFiles/BaseAV.dir/build.make CMakeFiles/BaseAV.dir/src/BaseAnalysisManager.cc.o
.PHONY : src/BaseAnalysisManager.cc.o

src/BaseAnalysisManager.i: src/BaseAnalysisManager.cc.i

.PHONY : src/BaseAnalysisManager.i

# target to preprocess a source file
src/BaseAnalysisManager.cc.i:
	$(MAKE) -f CMakeFiles/BaseAV.dir/build.make CMakeFiles/BaseAV.dir/src/BaseAnalysisManager.cc.i
.PHONY : src/BaseAnalysisManager.cc.i

src/BaseAnalysisManager.s: src/BaseAnalysisManager.cc.s

.PHONY : src/BaseAnalysisManager.s

# target to generate assembly for a file
src/BaseAnalysisManager.cc.s:
	$(MAKE) -f CMakeFiles/BaseAV.dir/build.make CMakeFiles/BaseAV.dir/src/BaseAnalysisManager.cc.s
.PHONY : src/BaseAnalysisManager.cc.s

src/BaseDetectorConstruction.o: src/BaseDetectorConstruction.cc.o

.PHONY : src/BaseDetectorConstruction.o

# target to build an object file
src/BaseDetectorConstruction.cc.o:
	$(MAKE) -f CMakeFiles/BaseAV.dir/build.make CMakeFiles/BaseAV.dir/src/BaseDetectorConstruction.cc.o
.PHONY : src/BaseDetectorConstruction.cc.o

src/BaseDetectorConstruction.i: src/BaseDetectorConstruction.cc.i

.PHONY : src/BaseDetectorConstruction.i

# target to preprocess a source file
src/BaseDetectorConstruction.cc.i:
	$(MAKE) -f CMakeFiles/BaseAV.dir/build.make CMakeFiles/BaseAV.dir/src/BaseDetectorConstruction.cc.i
.PHONY : src/BaseDetectorConstruction.cc.i

src/BaseDetectorConstruction.s: src/BaseDetectorConstruction.cc.s

.PHONY : src/BaseDetectorConstruction.s

# target to generate assembly for a file
src/BaseDetectorConstruction.cc.s:
	$(MAKE) -f CMakeFiles/BaseAV.dir/build.make CMakeFiles/BaseAV.dir/src/BaseDetectorConstruction.cc.s
.PHONY : src/BaseDetectorConstruction.cc.s

src/BaseEventAction.o: src/BaseEventAction.cc.o

.PHONY : src/BaseEventAction.o

# target to build an object file
src/BaseEventAction.cc.o:
	$(MAKE) -f CMakeFiles/BaseAV.dir/build.make CMakeFiles/BaseAV.dir/src/BaseEventAction.cc.o
.PHONY : src/BaseEventAction.cc.o

src/BaseEventAction.i: src/BaseEventAction.cc.i

.PHONY : src/BaseEventAction.i

# target to preprocess a source file
src/BaseEventAction.cc.i:
	$(MAKE) -f CMakeFiles/BaseAV.dir/build.make CMakeFiles/BaseAV.dir/src/BaseEventAction.cc.i
.PHONY : src/BaseEventAction.cc.i

src/BaseEventAction.s: src/BaseEventAction.cc.s

.PHONY : src/BaseEventAction.s

# target to generate assembly for a file
src/BaseEventAction.cc.s:
	$(MAKE) -f CMakeFiles/BaseAV.dir/build.make CMakeFiles/BaseAV.dir/src/BaseEventAction.cc.s
.PHONY : src/BaseEventAction.cc.s

src/BasePhysicsList.o: src/BasePhysicsList.cc.o

.PHONY : src/BasePhysicsList.o

# target to build an object file
src/BasePhysicsList.cc.o:
	$(MAKE) -f CMakeFiles/BaseAV.dir/build.make CMakeFiles/BaseAV.dir/src/BasePhysicsList.cc.o
.PHONY : src/BasePhysicsList.cc.o

src/BasePhysicsList.i: src/BasePhysicsList.cc.i

.PHONY : src/BasePhysicsList.i

# target to preprocess a source file
src/BasePhysicsList.cc.i:
	$(MAKE) -f CMakeFiles/BaseAV.dir/build.make CMakeFiles/BaseAV.dir/src/BasePhysicsList.cc.i
.PHONY : src/BasePhysicsList.cc.i

src/BasePhysicsList.s: src/BasePhysicsList.cc.s

.PHONY : src/BasePhysicsList.s

# target to generate assembly for a file
src/BasePhysicsList.cc.s:
	$(MAKE) -f CMakeFiles/BaseAV.dir/build.make CMakeFiles/BaseAV.dir/src/BasePhysicsList.cc.s
.PHONY : src/BasePhysicsList.cc.s

src/BasePrimaryGeneratorAction.o: src/BasePrimaryGeneratorAction.cc.o

.PHONY : src/BasePrimaryGeneratorAction.o

# target to build an object file
src/BasePrimaryGeneratorAction.cc.o:
	$(MAKE) -f CMakeFiles/BaseAV.dir/build.make CMakeFiles/BaseAV.dir/src/BasePrimaryGeneratorAction.cc.o
.PHONY : src/BasePrimaryGeneratorAction.cc.o

src/BasePrimaryGeneratorAction.i: src/BasePrimaryGeneratorAction.cc.i

.PHONY : src/BasePrimaryGeneratorAction.i

# target to preprocess a source file
src/BasePrimaryGeneratorAction.cc.i:
	$(MAKE) -f CMakeFiles/BaseAV.dir/build.make CMakeFiles/BaseAV.dir/src/BasePrimaryGeneratorAction.cc.i
.PHONY : src/BasePrimaryGeneratorAction.cc.i

src/BasePrimaryGeneratorAction.s: src/BasePrimaryGeneratorAction.cc.s

.PHONY : src/BasePrimaryGeneratorAction.s

# target to generate assembly for a file
src/BasePrimaryGeneratorAction.cc.s:
	$(MAKE) -f CMakeFiles/BaseAV.dir/build.make CMakeFiles/BaseAV.dir/src/BasePrimaryGeneratorAction.cc.s
.PHONY : src/BasePrimaryGeneratorAction.cc.s

src/BaseRunAction.o: src/BaseRunAction.cc.o

.PHONY : src/BaseRunAction.o

# target to build an object file
src/BaseRunAction.cc.o:
	$(MAKE) -f CMakeFiles/BaseAV.dir/build.make CMakeFiles/BaseAV.dir/src/BaseRunAction.cc.o
.PHONY : src/BaseRunAction.cc.o

src/BaseRunAction.i: src/BaseRunAction.cc.i

.PHONY : src/BaseRunAction.i

# target to preprocess a source file
src/BaseRunAction.cc.i:
	$(MAKE) -f CMakeFiles/BaseAV.dir/build.make CMakeFiles/BaseAV.dir/src/BaseRunAction.cc.i
.PHONY : src/BaseRunAction.cc.i

src/BaseRunAction.s: src/BaseRunAction.cc.s

.PHONY : src/BaseRunAction.s

# target to generate assembly for a file
src/BaseRunAction.cc.s:
	$(MAKE) -f CMakeFiles/BaseAV.dir/build.make CMakeFiles/BaseAV.dir/src/BaseRunAction.cc.s
.PHONY : src/BaseRunAction.cc.s

src/BaseStackingAction.o: src/BaseStackingAction.cc.o

.PHONY : src/BaseStackingAction.o

# target to build an object file
src/BaseStackingAction.cc.o:
	$(MAKE) -f CMakeFiles/BaseAV.dir/build.make CMakeFiles/BaseAV.dir/src/BaseStackingAction.cc.o
.PHONY : src/BaseStackingAction.cc.o

src/BaseStackingAction.i: src/BaseStackingAction.cc.i

.PHONY : src/BaseStackingAction.i

# target to preprocess a source file
src/BaseStackingAction.cc.i:
	$(MAKE) -f CMakeFiles/BaseAV.dir/build.make CMakeFiles/BaseAV.dir/src/BaseStackingAction.cc.i
.PHONY : src/BaseStackingAction.cc.i

src/BaseStackingAction.s: src/BaseStackingAction.cc.s

.PHONY : src/BaseStackingAction.s

# target to generate assembly for a file
src/BaseStackingAction.cc.s:
	$(MAKE) -f CMakeFiles/BaseAV.dir/build.make CMakeFiles/BaseAV.dir/src/BaseStackingAction.cc.s
.PHONY : src/BaseStackingAction.cc.s

src/BaseSteppingAction.o: src/BaseSteppingAction.cc.o

.PHONY : src/BaseSteppingAction.o

# target to build an object file
src/BaseSteppingAction.cc.o:
	$(MAKE) -f CMakeFiles/BaseAV.dir/build.make CMakeFiles/BaseAV.dir/src/BaseSteppingAction.cc.o
.PHONY : src/BaseSteppingAction.cc.o

src/BaseSteppingAction.i: src/BaseSteppingAction.cc.i

.PHONY : src/BaseSteppingAction.i

# target to preprocess a source file
src/BaseSteppingAction.cc.i:
	$(MAKE) -f CMakeFiles/BaseAV.dir/build.make CMakeFiles/BaseAV.dir/src/BaseSteppingAction.cc.i
.PHONY : src/BaseSteppingAction.cc.i

src/BaseSteppingAction.s: src/BaseSteppingAction.cc.s

.PHONY : src/BaseSteppingAction.s

# target to generate assembly for a file
src/BaseSteppingAction.cc.s:
	$(MAKE) -f CMakeFiles/BaseAV.dir/build.make CMakeFiles/BaseAV.dir/src/BaseSteppingAction.cc.s
.PHONY : src/BaseSteppingAction.cc.s

src/BaseTrackingAction.o: src/BaseTrackingAction.cc.o

.PHONY : src/BaseTrackingAction.o

# target to build an object file
src/BaseTrackingAction.cc.o:
	$(MAKE) -f CMakeFiles/BaseAV.dir/build.make CMakeFiles/BaseAV.dir/src/BaseTrackingAction.cc.o
.PHONY : src/BaseTrackingAction.cc.o

src/BaseTrackingAction.i: src/BaseTrackingAction.cc.i

.PHONY : src/BaseTrackingAction.i

# target to preprocess a source file
src/BaseTrackingAction.cc.i:
	$(MAKE) -f CMakeFiles/BaseAV.dir/build.make CMakeFiles/BaseAV.dir/src/BaseTrackingAction.cc.i
.PHONY : src/BaseTrackingAction.cc.i

src/BaseTrackingAction.s: src/BaseTrackingAction.cc.s

.PHONY : src/BaseTrackingAction.s

# target to generate assembly for a file
src/BaseTrackingAction.cc.s:
	$(MAKE) -f CMakeFiles/BaseAV.dir/build.make CMakeFiles/BaseAV.dir/src/BaseTrackingAction.cc.s
.PHONY : src/BaseTrackingAction.cc.s

src/Settings.o: src/Settings.cc.o

.PHONY : src/Settings.o

# target to build an object file
src/Settings.cc.o:
	$(MAKE) -f CMakeFiles/BaseAV.dir/build.make CMakeFiles/BaseAV.dir/src/Settings.cc.o
.PHONY : src/Settings.cc.o

src/Settings.i: src/Settings.cc.i

.PHONY : src/Settings.i

# target to preprocess a source file
src/Settings.cc.i:
	$(MAKE) -f CMakeFiles/BaseAV.dir/build.make CMakeFiles/BaseAV.dir/src/Settings.cc.i
.PHONY : src/Settings.cc.i

src/Settings.s: src/Settings.cc.s

.PHONY : src/Settings.s

# target to generate assembly for a file
src/Settings.cc.s:
	$(MAKE) -f CMakeFiles/BaseAV.dir/build.make CMakeFiles/BaseAV.dir/src/Settings.cc.s
.PHONY : src/Settings.cc.s

src/StepMax.o: src/StepMax.cc.o

.PHONY : src/StepMax.o

# target to build an object file
src/StepMax.cc.o:
	$(MAKE) -f CMakeFiles/BaseAV.dir/build.make CMakeFiles/BaseAV.dir/src/StepMax.cc.o
.PHONY : src/StepMax.cc.o

src/StepMax.i: src/StepMax.cc.i

.PHONY : src/StepMax.i

# target to preprocess a source file
src/StepMax.cc.i:
	$(MAKE) -f CMakeFiles/BaseAV.dir/build.make CMakeFiles/BaseAV.dir/src/StepMax.cc.i
.PHONY : src/StepMax.cc.i

src/StepMax.s: src/StepMax.cc.s

.PHONY : src/StepMax.s

# target to generate assembly for a file
src/StepMax.cc.s:
	$(MAKE) -f CMakeFiles/BaseAV.dir/build.make CMakeFiles/BaseAV.dir/src/StepMax.cc.s
.PHONY : src/StepMax.cc.s

# Help Target
help:
	@echo "The following are some of the valid targets for this Makefile:"
	@echo "... all (the default if no target is provided)"
	@echo "... clean"
	@echo "... depend"
	@echo "... install"
	@echo "... list_install_components"
	@echo "... install/strip"
	@echo "... install/local"
	@echo "... CMakeRules"
	@echo "... BaseAV"
	@echo "... edit_cache"
	@echo "... rebuild_cache"
	@echo "... BaseAV.o"
	@echo "... BaseAV.i"
	@echo "... BaseAV.s"
	@echo "... src/BaseAnalysisManager.o"
	@echo "... src/BaseAnalysisManager.i"
	@echo "... src/BaseAnalysisManager.s"
	@echo "... src/BaseDetectorConstruction.o"
	@echo "... src/BaseDetectorConstruction.i"
	@echo "... src/BaseDetectorConstruction.s"
	@echo "... src/BaseEventAction.o"
	@echo "... src/BaseEventAction.i"
	@echo "... src/BaseEventAction.s"
	@echo "... src/BasePhysicsList.o"
	@echo "... src/BasePhysicsList.i"
	@echo "... src/BasePhysicsList.s"
	@echo "... src/BasePrimaryGeneratorAction.o"
	@echo "... src/BasePrimaryGeneratorAction.i"
	@echo "... src/BasePrimaryGeneratorAction.s"
	@echo "... src/BaseRunAction.o"
	@echo "... src/BaseRunAction.i"
	@echo "... src/BaseRunAction.s"
	@echo "... src/BaseStackingAction.o"
	@echo "... src/BaseStackingAction.i"
	@echo "... src/BaseStackingAction.s"
	@echo "... src/BaseSteppingAction.o"
	@echo "... src/BaseSteppingAction.i"
	@echo "... src/BaseSteppingAction.s"
	@echo "... src/BaseTrackingAction.o"
	@echo "... src/BaseTrackingAction.i"
	@echo "... src/BaseTrackingAction.s"
	@echo "... src/Settings.o"
	@echo "... src/Settings.i"
	@echo "... src/Settings.s"
	@echo "... src/StepMax.o"
	@echo "... src/StepMax.i"
	@echo "... src/StepMax.s"
.PHONY : help


#=============================================================================
# Special targets to cleanup operation of make.

# Special rule to run CMake to check the build system integrity.
# No rule that depends on this can have commands that come from listfiles
# because they might be regenerated.
cmake_check_build_system:
	$(CMAKE_COMMAND) -H$(CMAKE_SOURCE_DIR) -B$(CMAKE_BINARY_DIR) --check-build-system CMakeFiles/Makefile.cmake 0
.PHONY : cmake_check_build_system
