# Supplementary material for: Evaluation of Monte Carlo tools for high energy atmospheric physics II: relativistic runaway electron avalanches
Source: Copernicus journal article supplement (doi:10.5194/gmd-2018-119), 2018-06-14
Supplement: Supplementary file 2 [file gmd-2018-119-supplement.zip › geant4_codes/avalanche_probabilities_prob/GEANT4/code/src/include/BaseRunAction.hh]

#ifndef BaseRunAction_h
#define BaseRunAction_h 1

#include "G4UserRunAction.hh"
#include "globals.hh"
#include <iostream>

#include "Settings.hh"

#include "BaseAnalysisManager.hh"

class G4Run;

class BaseRunAction : public G4UserRunAction
{
    public:

        BaseRunAction();
        ~BaseRunAction();

        void BeginOfRunAction(const G4Run *);
        void EndOfRunAction(const G4Run *);

        void  SetRndmFreq(G4int   val)
        {
            saveRndm = val;
        }
        G4int GetRndmFreq()
        {
            return saveRndm;
        }


    private:
        G4int saveRndm;

        BaseAnalysisManager *analysis = BaseAnalysisManager::getInstance();
};

#endif
