# Supplementary material for: Evaluation of Monte Carlo tools for high energy atmospheric physics II: relativistic runaway electron avalanches
Source: Copernicus journal article supplement (doi:10.5194/gmd-2018-119), 2018-06-14
Supplement: Supplementary file 2 [file gmd-2018-119-supplement.zip › geant4_codes/avalanche_probabilities_prob/GEANT4/code/src/include/BaseSteppingAction.hh]

//
// ********************************************************************
// * License and Disclaimer                                           *
// *                                                                  *
// * The  Geant4 software  is  copyright of the Copyright Holders  of *
// * the Geant4 Collaboration.  It is provided  under  the terms  and *
// * conditions of the Geant4 Software License,  included in the file *
// * LICENSE and available at  http://cern.ch/geant4/license .  These *
// * include a list of copyright holders.                             *
// *                                                                  *
// * Neither the authors of this software system, nor their employing *
// * institutes,nor the agencies providing financial support for this *
// * work  make  any representation or  warranty, express or implied, *
// * regarding  this  software system or assume any liability for its *
// * use.  Please see the license in the file  LICENSE  and URL above *
// * for the full disclaimer and the limitation of liability.         *
// *                                                                  *
// * This  code  implementation is the result of  the  scientific and *
// * technical work of the GEANT4 collaboration.                      *
// * By using,  copying,  modifying or  distributing the software (or *
// * any work based  on the software)  you  agree  to acknowledge its *
// * use  in  resulting  scientific  publications,  and indicate your *
// * acceptance of all terms of the Geant4 Software license.          *
// ********************************************************************
//
//....oooOO0OOooo........oooOO0OOooo........oooOO0OOooo........oooOO0OOooo....

#ifndef BaseSteppingAction_h
#define BaseSteppingAction_h 1

#include "G4UserSteppingAction.hh"
#include "G4VPVParameterisation.hh"
#include "G4PVParameterised.hh"
#include "Settings.hh"
#include <vector>
#include "G4SystemOfUnits.hh"

class BaseDetectorConstruction;
class BaseAnalysisManager;

//....oooOO0OOooo........oooOO0OOooo........oooOO0OOooo........oooOO0OOooo....

class BaseSteppingAction : public G4UserSteppingAction
{
    public:
        BaseSteppingAction(BaseDetectorConstruction *);
        ~BaseSteppingAction();

        void UserSteppingAction(const G4Step *);

    private:
        BaseDetectorConstruction *Detector;

        bool ID_not_already_saved(const G4int ID, const std::vector<G4int> LIST_1MEV_IDS);

        std::vector<G4double> primary_step_times;
        std::vector<G4double> primary_step_energies;


};

#endif
