# Supplementary material for: Evaluation of Monte Carlo tools for high energy atmospheric physics II: relativistic runaway electron avalanches
Source: Copernicus journal article supplement (doi:10.5194/gmd-2018-119), 2018-06-14
Supplement: Supplementary file 2 [file gmd-2018-119-supplement.zip › geant4_codes/avalanche_probabilities_prob/GEANT4/code/src/src/BaseRunAction.cc]

#include "BaseRunAction.hh"

#include "G4Run.hh"
#include "G4UnitsTable.hh"
#include "G4SystemOfUnits.hh"
#include "Randomize.hh"
#include "BaseAnalysisManager.hh"
#include "G4UnitsTable.hh"
#include "G4Element.hh"
#include "G4Material.hh"
#include "G4ParticleTable.hh"
#include "G4EmCalculator.hh"

#include <time.h>
#include <sys/time.h>

#include <numeric>
#include <thread>
#include <boost/filesystem.hpp>


BaseRunAction::BaseRunAction()
{

}


BaseRunAction::~BaseRunAction()
{}


void BaseRunAction::BeginOfRunAction(const G4Run *)
{
    GLOB::COUNT_AVALAN = 0;
    GLOB::NB_LAUNCHED = 0;
}


void BaseRunAction::EndOfRunAction(const G4Run *)
{
    analysis->write_output_file();
}
