# Supplementary material for: Evaluation of Monte Carlo tools for high energy atmospheric physics II: relativistic runaway electron avalanches
Source: Copernicus journal article supplement (doi:10.5194/gmd-2018-119), 2018-06-14
Supplement: Supplementary file 2 [file gmd-2018-119-supplement.zip › geant4_codes/avalanche_probabilities_prob/GEANT4/code/src/src/Settings.cc]

#include "G4UnitsTable.hh"
#include "Settings.hh"
#include "G4SystemOfUnits.hh"

// ....oooOO0OOooo........oooOO0OOooo........oooOO0OOooo........oooOO0OOooo......
namespace GLOB
{
    // GLOBAL namespace
    // All these variables are put here to be shared amounts source files
    // (not very c++ but easier to implement)

    bool KILL_ALL_FLAG = false;

    G4String PHYSLIST;

    const double LOG10_EPSTOL = -6;

    G4String NUMBER_TO_SHOT;

    int Rand_seed;

    G4int NB_LAUNCHED = 0;

    G4String ORIENT = "+1"; // "+1" or "-1" initial particle momentum along the field or opposite direction

    int NB_1MEV_ELEC_REQ; // number of required avalanches

    double PRIMARY_ENERGY; // MeV

    const int TYPE = -1;

    std::vector<G4int> LIST_1MEV_IDS;

    double TIME_LIMIT = 0.00 * microsecond;

    double EFIELD; // V/m

    int COUNT_1MEV_ELEC = 0;

    int COUNT_AVALAN = 0;

    G4double MAX_STEP = 1.0;

    const G4double time_step = 0.05 * microsecond;

}
