# Supplementary material for: Evaluation of Monte Carlo tools for high energy atmospheric physics II: relativistic runaway electron avalanches
Source: Copernicus journal article supplement (doi:10.5194/gmd-2018-119), 2018-06-14
Supplement: Supplementary file 2 [file gmd-2018-119-supplement.zip › geant4_codes/avalanche_probabilities_prob/GEANT4/data/fused.txt]

10000          -1             O4             1000           3.00000e+06    1.00000e+00    7.13000e+01    

1000           +1             O1             1000           3.00000e+06    5.96362e-02    9.46000e+01    

1001           +1             O1             1000           2.00000e+05    6.55129e-02    0.00000e+00    

1002           +1             O1             1000           2.57143e+05    6.55129e-02    0.00000e+00    

1003           +1             O1             1000           3.14286e+05    6.55129e-02    0.00000e+00    

1004           +1             O1             1000           3.71429e+05    6.55129e-02    0.00000e+00    

1005           +1             O1             1000           4.28571e+05    6.55129e-02    0.00000e+00    

1006           +1             O1             1000           4.85714e+05    6.55129e-02    0.00000e+00    

1007           +1             O1             1000           5.42857e+05    6.55129e-02    0.00000e+00    

1008           +1             O1             1000           6.00000e+05    6.55129e-02    0.00000e+00    

1009           +1             O1             1000           6.57143e+05    6.55129e-02    0.00000e+00    

100            +1             O1             1000           3.00000e+06    1.09854e-02    0.00000e+00    

1010           +1             O1             1000           7.14286e+05    6.55129e-02    0.00000e+00    

1011           +1             O1             1000           7.71429e+05    6.55129e-02    4.00000e-01    

1012           +1             O1             1000           8.28571e+05    6.55129e-02    9.00000e-01    

1013           +1             O1             1000           8.85714e+05    6.55129e-02    3.80000e+00    

1014           +1             O1             1000           9.42857e+05    6.55129e-02    7.00000e+00    

1015           +1             O1             1000           1.00000e+06    6.55129e-02    1.63000e+01    

1016           +1             O1             1000           1.05714e+06    6.55129e-02    2.33000e+01    

1017           +1             O1             1000           1.11429e+06    6.55129e-02    2.86000e+01    

1018           +1             O1             1000           1.17143e+06    6.55129e-02    3.99000e+01    

1019           +1             O1             1000           1.22857e+06    6.55129e-02    4.70000e+01    

101            +1             O1             1000           2.00000e+05    1.20679e-02    0.00000e+00    

1020           +1             O1             1000           1.28571e+06    6.55129e-02    5.24000e+01    

1021           +1             O1             1000           1.34286e+06    6.55129e-02    5.62000e+01    

1022           +1             O1             1000           1.40000e+06    6.55129e-02    6.42000e+01    

1023           +1             O1             1000           1.45714e+06    6.55129e-02    6.63000e+01    

1024           +1             O1             1000           1.51429e+06    6.55129e-02    7.07000e+01    

1025           +1             O1             1000           1.57143e+06    6.55129e-02    7.68000e+01    

1026           +1             O1             1000           1.62857e+06    6.55129e-02    7.64000e+01    

1027           +1             O1             1000           1.68571e+06    6.55129e-02    8.10000e+01    

1028           +1             O1             1000           1.74286e+06    6.55129e-02    8.23000e+01    

1029           +1             O1             1000           1.80000e+06    6.55129e-02    8.36000e+01    

102            +1             O1             1000           2.57143e+05    1.20679e-02    0.00000e+00    

1030           +1             O1             1000           1.85714e+06    6.55129e-02    8.59000e+01    

1031           +1             O1             1000           1.91429e+06    6.55129e-02    8.70000e+01    

1032           +1             O1             1000           1.97143e+06    6.55129e-02    8.86000e+01    

1033           +1             O1             1000           2.02857e+06    6.55129e-02    9.10000e+01    

1034           +1             O1             1000           2.08571e+06    6.55129e-02    9.18000e+01    

1035           +1             O1             1000           2.14286e+06    6.55129e-02    9.10000e+01    

1036           +1             O1             1000           2.20000e+06    6.55129e-02    9.24000e+01    

1037           +1             O1             1000           2.25714e+06    6.55129e-02    9.16000e+01    

1038           +1             O1             1000           2.31429e+06    6.55129e-02    9.47000e+01    

1039           +1             O1             1000           2.37143e+06    6.55129e-02    9.39000e+01    

103            +1             O1             1000           3.14286e+05    1.20679e-02    0.00000e+00    

1040           +1             O1             1000           2.42857e+06    6.55129e-02    9.36000e+01    

1041           +1             O1             1000           2.48571e+06    6.55129e-02    9.52000e+01    

1042           +1             O1             1000           2.54286e+06    6.55129e-02    9.56000e+01    

1043           +1             O1             1000           2.60000e+06    6.55129e-02    9.62000e+01    

1044           +1             O1             1000           2.65714e+06    6.55129e-02    9.61000e+01    

1045           +1             O1             1000           2.71429e+06    6.55129e-02    9.58000e+01    

1046           +1             O1             1000           2.77143e+06    6.55129e-02    9.63000e+01    

1047           +1             O1             1000           2.82857e+06    6.55129e-02    9.57000e+01    

1048           +1             O1             1000           2.88571e+06    6.55129e-02    9.69000e+01    

1049           +1             O1             1000           2.94286e+06    6.55129e-02    9.66000e+01    

104            +1             O1             1000           3.71429e+05    1.20679e-02    0.00000e+00    

1050           +1             O1             1000           3.00000e+06    6.55129e-02    9.80000e+01    

1051           +1             O1             1000           2.00000e+05    7.19686e-02    0.00000e+00    

1052           +1             O1             1000           2.57143e+05    7.19686e-02    0.00000e+00    

1053           +1             O1             1000           3.14286e+05    7.19686e-02    0.00000e+00    

1054           +1             O1             1000           3.71429e+05    7.19686e-02    0.00000e+00    

1055           +1             O1             1000           4.28571e+05    7.19686e-02    0.00000e+00    

1056           +1             O1             1000           4.85714e+05    7.19686e-02    0.00000e+00    

1057           +1             O1             1000           5.42857e+05    7.19686e-02    0.00000e+00    

1058           +1             O1             1000           6.00000e+05    7.19686e-02    0.00000e+00    

1059           +1             O1             1000           6.57143e+05    7.19686e-02    0.00000e+00    

105            +1             O1             1000           4.28571e+05    1.20679e-02    0.00000e+00    

1060           +1             O1             1000           7.14286e+05    7.19686e-02    3.00000e-01    

1061           +1             O1             1000           7.71429e+05    7.19686e-02    1.50000e+00    

1062           +1             O1             1000           8.28571e+05    7.19686e-02    4.20000e+00    

1063           +1             O1             1000           8.85714e+05    7.19686e-02    1.25000e+01    

1064           +1             O1             1000           9.42857e+05    7.19686e-02    1.64000e+01    

1065           +1             O1             1000           1.00000e+06    7.19686e-02    2.97000e+01    

1066           +1             O1             1000           1.05714e+06    7.19686e-02    3.45000e+01    

1067           +1             O1             1000           1.11429e+06    7.19686e-02    4.53000e+01    

1068           +1             O1             1000           1.17143e+06    7.19686e-02    5.24000e+01    

1069           +1             O1             1000           1.22857e+06    7.19686e-02    5.85000e+01    

106            +1             O1             1000           4.85714e+05    1.20679e-02    0.00000e+00    

1070           +1             O1             1000           1.28571e+06    7.19686e-02    6.38000e+01    

1071           +1             O1             1000           1.34286e+06    7.19686e-02    6.90000e+01    

1072           +1             O1             1000           1.40000e+06    7.19686e-02    7.53000e+01    

1073           +1             O1             1000           1.45714e+06    7.19686e-02    7.69000e+01    

1074           +1             O1             1000           1.51429e+06    7.19686e-02    7.88000e+01    

1075           +1             O1             1000           1.57143e+06    7.19686e-02    8.22000e+01    

1076           +1             O1             1000           1.62857e+06    7.19686e-02    8.46000e+01    

1077           +1             O1             1000           1.68571e+06    7.19686e-02    8.72000e+01    

1078           +1             O1             1000           1.74286e+06    7.19686e-02    8.76000e+01    

1079           +1             O1             1000           1.80000e+06    7.19686e-02    8.98000e+01    

107            +1             O1             1000           5.42857e+05    1.20679e-02    0.00000e+00    

1080           +1             O1             1000           1.85714e+06    7.19686e-02    9.02000e+01    

1081           +1             O1             1000           1.91429e+06    7.19686e-02    9.18000e+01    

1082           +1             O1             1000           1.97143e+06    7.19686e-02    9.34000e+01    

1083           +1             O1             1000           2.02857e+06    7.19686e-02    9.32000e+01    

1084           +1             O1             1000           2.08571e+06    7.19686e-02    9.38000e+01    

1085           +1             O1             1000           2.14286e+06    7.19686e-02    9.40000e+01    

1086           +1             O1             1000           2.20000e+06    7.19686e-02    9.37000e+01    

1087           +1             O1             1000           2.25714e+06    7.19686e-02    9.52000e+01    

1088           +1             O1             1000           2.31429e+06    7.19686e-02    9.60000e+01    

1089           +1             O1             1000           2.37143e+06    7.19686e-02    9.66000e+01    

108            +1             O1             1000           6.00000e+05    1.20679e-02    0.00000e+00    

1090           +1             O1             1000           2.42857e+06    7.19686e-02    9.63000e+01    

1091           +1             O1             1000           2.48571e+06    7.19686e-02    9.62000e+01    

1092           +1             O1             1000           2.54286e+06    7.19686e-02    9.76000e+01    

1093           +1             O1             1000           2.60000e+06    7.19686e-02    9.69000e+01    

1094           +1             O1             1000           2.65714e+06    7.19686e-02    9.64000e+01    

1095           +1             O1             1000           2.71429e+06    7.19686e-02    9.71000e+01    

1096           +1             O1             1000           2.77143e+06    7.19686e-02    9.69000e+01    

1097           +1             O1             1000           2.82857e+06    7.19686e-02    9.72000e+01    

1098           +1             O1             1000           2.88571e+06    7.19686e-02    9.76000e+01    

1099           +1             O1             1000           2.94286e+06    7.19686e-02    9.86000e+01    

109            +1             O1             1000           6.57143e+05    1.20679e-02    0.00000e+00    

10             +1             O1             1000           7.14286e+05    1.00000e-02    0.00000e+00    

1100           +1             O1             1000           3.00000e+06    7.19686e-02    9.80000e+01    

1101           +1             O1             1000           2.00000e+05    7.90604e-02    0.00000e+00    

1102           +1             O1             1000           2.57143e+05    7.90604e-02    0.00000e+00    

1103           +1             O1             1000           3.14286e+05    7.90604e-02    0.00000e+00    

1104           +1             O1             1000           3.71429e+05    7.90604e-02    0.00000e+00    

1105           +1             O1             1000           4.28571e+05    7.90604e-02    0.00000e+00    

1106           +1             O1             1000           4.85714e+05    7.90604e-02    0.00000e+00    

1107           +1             O1             1000           5.42857e+05    7.90604e-02    0.00000e+00    

1108           +1             O1             1000           6.00000e+05    7.90604e-02    0.00000e+00    

1109           +1             O1             1000           6.57143e+05    7.90604e-02    4.00000e-01    

110            +1             O1             1000           7.14286e+05    1.20679e-02    0.00000e+00    

1110           +1             O1             1000           7.14286e+05    7.90604e-02    1.50000e+00    

1111           +1             O1             1000           7.71429e+05    7.90604e-02    4.30000e+00    

1112           +1             O1             1000           8.28571e+05    7.90604e-02    1.16000e+01    

1113           +1             O1             1000           8.85714e+05    7.90604e-02    2.13000e+01    

1114           +1             O1             1000           9.42857e+05    7.90604e-02    2.92000e+01    

1115           +1             O1             1000           1.00000e+06    7.90604e-02    4.07000e+01    

1116           +1             O1             1000           1.05714e+06    7.90604e-02    4.74000e+01    

1117           +1             O1             1000           1.11429e+06    7.90604e-02    5.57000e+01    

1118           +1             O1             1000           1.17143e+06    7.90604e-02    6.19000e+01    

1119           +1             O1             1000           1.22857e+06    7.90604e-02    7.05000e+01    

111            +1             O1             1000           7.71429e+05    1.20679e-02    0.00000e+00    

1120           +1             O1             1000           1.28571e+06    7.90604e-02    7.36000e+01    

1121           +1             O1             1000           1.34286e+06    7.90604e-02    7.59000e+01    

1122           +1             O1             1000           1.40000e+06    7.90604e-02    8.08000e+01    

1123           +1             O1             1000           1.45714e+06    7.90604e-02    8.27000e+01    

1124           +1             O1             1000           1.51429e+06    7.90604e-02    8.67000e+01    

1125           +1             O1             1000           1.57143e+06    7.90604e-02    8.88000e+01    

1126           +1             O1             1000           1.62857e+06    7.90604e-02    8.90000e+01    

1127           +1             O1             1000           1.68571e+06    7.90604e-02    9.11000e+01    

1128           +1             O1             1000           1.74286e+06    7.90604e-02    9.26000e+01    

1129           +1             O1             1000           1.80000e+06    7.90604e-02    9.18000e+01    

112            +1             O1             1000           8.28571e+05    1.20679e-02    0.00000e+00    

1130           +1             O1             1000           1.85714e+06    7.90604e-02    9.34000e+01    

1131           +1             O1             1000           1.91429e+06    7.90604e-02    9.37000e+01    

1132           +1             O1             1000           1.97143e+06    7.90604e-02    9.43000e+01    

1133           +1             O1             1000           2.02857e+06    7.90604e-02    9.38000e+01    

1134           +1             O1             1000           2.08571e+06    7.90604e-02    9.47000e+01    

1135           +1             O1             1000           2.14286e+06    7.90604e-02    9.73000e+01    

1136           +1             O1             1000           2.20000e+06    7.90604e-02    9.61000e+01    

1137           +1             O1             1000           2.25714e+06    7.90604e-02    9.62000e+01    

1138           +1             O1             1000           2.31429e+06    7.90604e-02    9.80000e+01    

1139           +1             O1             1000           2.37143e+06    7.90604e-02    9.88000e+01    

113            +1             O1             1000           8.85714e+05    1.20679e-02    0.00000e+00    

1140           +1             O1             1000           2.42857e+06    7.90604e-02    9.80000e+01    

1141           +1             O1             1000           2.48571e+06    7.90604e-02    9.78000e+01    

1142           +1             O1             1000           2.54286e+06    7.90604e-02    9.86000e+01    

1143           +1             O1             1000           2.60000e+06    7.90604e-02    9.76000e+01    

1144           +1             O1             1000           2.65714e+06    7.90604e-02    9.80000e+01    

1145           +1             O1             1000           2.71429e+06    7.90604e-02    9.78000e+01    

1146           +1             O1             1000           2.77143e+06    7.90604e-02    9.86000e+01    

1147           +1             O1             1000           2.82857e+06    7.90604e-02    9.85000e+01    

1148           +1             O1             1000           2.88571e+06    7.90604e-02    9.87000e+01    

1149           +1             O1             1000           2.94286e+06    7.90604e-02    9.83000e+01    

114            +1             O1             1000           9.42857e+05    1.20679e-02    0.00000e+00    

1150           +1             O1             1000           3.00000e+06    7.90604e-02    9.84000e+01    

1151           +1             O1             1000           2.00000e+05    8.68511e-02    0.00000e+00    

1152           +1             O1             1000           2.57143e+05    8.68511e-02    0.00000e+00    

1153           +1             O1             1000           3.14286e+05    8.68511e-02    0.00000e+00    

1154           +1             O1             1000           3.71429e+05    8.68511e-02    0.00000e+00    

1155           +1             O1             1000           4.28571e+05    8.68511e-02    0.00000e+00    

1156           +1             O1             1000           4.85714e+05    8.68511e-02    0.00000e+00    

1157           +1             O1             1000           5.42857e+05    8.68511e-02    0.00000e+00    

1158           +1             O1             1000           6.00000e+05    8.68511e-02    0.00000e+00    

1159           +1             O1             1000           6.57143e+05    8.68511e-02    1.20000e+00    

115            +1             O1             1000           1.00000e+06    1.20679e-02    0.00000e+00    

1160           +1             O1             1000           7.14286e+05    8.68511e-02    6.30000e+00    

1161           +1             O1             1000           7.71429e+05    8.68511e-02    1.27000e+01    

1162           +1             O1             1000           8.28571e+05    8.68511e-02    2.11000e+01    

1163           +1             O1             1000           8.85714e+05    8.68511e-02    3.25000e+01    

1164           +1             O1             1000           9.42857e+05    8.68511e-02    4.34000e+01    

1165           +1             O1             1000           1.00000e+06    8.68511e-02    5.18000e+01    

1166           +1             O1             1000           1.05714e+06    8.68511e-02    5.66000e+01    

1167           +1             O1             1000           1.11429e+06    8.68511e-02    6.89000e+01    

1168           +1             O1             1000           1.17143e+06    8.68511e-02    7.31000e+01    

1169           +1             O1             1000           1.22857e+06    8.68511e-02    7.82000e+01    

116            +1             O1             1000           1.05714e+06    1.20679e-02    0.00000e+00    

1170           +1             O1             1000           1.28571e+06    8.68511e-02    8.23000e+01    

1171           +1             O1             1000           1.34286e+06    8.68511e-02    8.41000e+01    

1172           +1             O1             1000           1.40000e+06    8.68511e-02    8.70000e+01    

1173           +1             O1             1000           1.45714e+06    8.68511e-02    8.78000e+01    

1174           +1             O1             1000           1.51429e+06    8.68511e-02    8.98000e+01    

1175           +1             O1             1000           1.57143e+06    8.68511e-02    9.13000e+01    

1176           +1             O1             1000           1.62857e+06    8.68511e-02    9.24000e+01    

1177           +1             O1             1000           1.68571e+06    8.68511e-02    9.30000e+01    

1178           +1             O1             1000           1.74286e+06    8.68511e-02    9.42000e+01    

1179           +1             O1             1000           1.80000e+06    8.68511e-02    9.52000e+01    

117            +1             O1             1000           1.11429e+06    1.20679e-02    0.00000e+00    

1180           +1             O1             1000           1.85714e+06    8.68511e-02    9.54000e+01    

1181           +1             O1             1000           1.91429e+06    8.68511e-02    9.63000e+01    

1182           +1             O1             1000           1.97143e+06    8.68511e-02    9.57000e+01    

1183           +1             O1             1000           2.02857e+06    8.68511e-02    9.70000e+01    

1184           +1             O1             1000           2.08571e+06    8.68511e-02    9.71000e+01    

1185           +1             O1             1000           2.14286e+06    8.68511e-02    9.73000e+01    

1186           +1             O1             1000           2.20000e+06    8.68511e-02    9.79000e+01    

1187           +1             O1             1000           2.25714e+06    8.68511e-02    9.77000e+01    

1188           +1             O1             1000           2.31429e+06    8.68511e-02    9.83000e+01    

1189           +1             O1             1000           2.37143e+06    8.68511e-02    9.78000e+01    

118            +1             O1             1000           1.17143e+06    1.20679e-02    0.00000e+00    

1190           +1             O1             1000           2.42857e+06    8.68511e-02    9.88000e+01    

1191           +1             O1             1000           2.48571e+06    8.68511e-02    9.86000e+01    

1192           +1             O1             1000           2.54286e+06    8.68511e-02    9.85000e+01    

1193           +1             O1             1000           2.60000e+06    8.68511e-02    9.90000e+01    

1194           +1             O1             1000           2.65714e+06    8.68511e-02    9.86000e+01    

1195           +1             O1             1000           2.71429e+06    8.68511e-02    9.88000e+01    

1196           +1             O1             1000           2.77143e+06    8.68511e-02    9.85000e+01    

1197           +1             O1             1000           2.82857e+06    8.68511e-02    9.94000e+01    

1198           +1             O1             1000           2.88571e+06    8.68511e-02    9.91000e+01    

1199           +1             O1             1000           2.94286e+06    8.68511e-02    9.91000e+01    

119            +1             O1             1000           1.22857e+06    1.20679e-02    0.00000e+00    

11             +1             O1             1000           7.71429e+05    1.00000e-02    0.00000e+00    

1200           +1             O1             1000           3.00000e+06    8.68511e-02    9.89000e+01    

1201           +1             O1             1000           2.00000e+05    9.54095e-02    0.00000e+00    

1202           +1             O1             1000           2.57143e+05    9.54095e-02    0.00000e+00    

1203           +1             O1             1000           3.14286e+05    9.54095e-02    0.00000e+00    

1204           +1             O1             1000           3.71429e+05    9.54095e-02    0.00000e+00    

1205           +1             O1             1000           4.28571e+05    9.54095e-02    0.00000e+00    

1206           +1             O1             1000           4.85714e+05    9.54095e-02    0.00000e+00    

1207           +1             O1             1000           5.42857e+05    9.54095e-02    0.00000e+00    

1208           +1             O1             1000           6.00000e+05    9.54095e-02    5.00000e-01    

1209           +1             O1             1000           6.57143e+05    9.54095e-02    3.90000e+00    

120            +1             O1             1000           1.28571e+06    1.20679e-02    0.00000e+00    

1210           +1             O1             1000           7.14286e+05    9.54095e-02    1.21000e+01    

1211           +1             O1             1000           7.71429e+05    9.54095e-02    2.12000e+01    

1212           +1             O1             1000           8.28571e+05    9.54095e-02    3.20000e+01    

1213           +1             O1             1000           8.85714e+05    9.54095e-02    4.54000e+01    

1214           +1             O1             1000           9.42857e+05    9.54095e-02    5.26000e+01    

1215           +1             O1             1000           1.00000e+06    9.54095e-02    6.20000e+01    

1216           +1             O1             1000           1.05714e+06    9.54095e-02    6.63000e+01    

1217           +1             O1             1000           1.11429e+06    9.54095e-02    7.26000e+01    

1218           +1             O1             1000           1.17143e+06    9.54095e-02    7.94000e+01    

1219           +1             O1             1000           1.22857e+06    9.54095e-02    8.39000e+01    

121            +1             O1             1000           1.34286e+06    1.20679e-02    0.00000e+00    

1220           +1             O1             1000           1.28571e+06    9.54095e-02    8.44000e+01    

1221           +1             O1             1000           1.34286e+06    9.54095e-02    8.81000e+01    

1222           +1             O1             1000           1.40000e+06    9.54095e-02    8.89000e+01    

1223           +1             O1             1000           1.45714e+06    9.54095e-02    9.13000e+01    

1224           +1             O1             1000           1.51429e+06    9.54095e-02    9.14000e+01    

1225           +1             O1             1000           1.57143e+06    9.54095e-02    9.33000e+01    

1226           +1             O1             1000           1.62857e+06    9.54095e-02    9.51000e+01    

1227           +1             O1             1000           1.68571e+06    9.54095e-02    9.50000e+01    

1228           +1             O1             1000           1.74286e+06    9.54095e-02    9.53000e+01    

1229           +1             O1             1000           1.80000e+06    9.54095e-02    9.67000e+01    

122            +1             O1             1000           1.40000e+06    1.20679e-02    0.00000e+00    

1230           +1             O1             1000           1.85714e+06    9.54095e-02    9.66000e+01    

1231           +1             O1             1000           1.91429e+06    9.54095e-02    9.72000e+01    

1232           +1             O1             1000           1.97143e+06    9.54095e-02    9.76000e+01    

1233           +1             O1             1000           2.02857e+06    9.54095e-02    9.79000e+01    

1234           +1             O1             1000           2.08571e+06    9.54095e-02    9.79000e+01    

1235           +1             O1             1000           2.14286e+06    9.54095e-02    9.94000e+01    

1236           +1             O1             1000           2.20000e+06    9.54095e-02    9.82000e+01    

1237           +1             O1             1000           2.25714e+06    9.54095e-02    9.80000e+01    

1238           +1             O1             1000           2.31429e+06    9.54095e-02    9.87000e+01    

1239           +1             O1             1000           2.37143e+06    9.54095e-02    9.84000e+01    

123            +1             O1             1000           1.45714e+06    1.20679e-02    0.00000e+00    

1240           +1             O1             1000           2.42857e+06    9.54095e-02    9.90000e+01    

1241           +1             O1             1000           2.48571e+06    9.54095e-02    9.82000e+01    

1242           +1             O1             1000           2.54286e+06    9.54095e-02    9.87000e+01    

1243           +1             O1             1000           2.60000e+06    9.54095e-02    9.93000e+01    

1244           +1             O1             1000           2.65714e+06    9.54095e-02    9.91000e+01    

1245           +1             O1             1000           2.71429e+06    9.54095e-02    9.89000e+01    

1246           +1             O1             1000           2.77143e+06    9.54095e-02    9.91000e+01    

1247           +1             O1             1000           2.82857e+06    9.54095e-02    9.94000e+01    

1248           +1             O1             1000           2.88571e+06    9.54095e-02    9.91000e+01    

1249           +1             O1             1000           2.94286e+06    9.54095e-02    9.94000e+01    

124            +1             O1             1000           1.51429e+06    1.20679e-02    0.00000e+00    

1250           +1             O1             1000           3.00000e+06    9.54095e-02    9.95000e+01    

1251           +1             O1             1000           2.00000e+05    1.04811e-01    0.00000e+00    

1252           +1             O1             1000           2.57143e+05    1.04811e-01    0.00000e+00    

1253           +1             O1             1000           3.14286e+05    1.04811e-01    0.00000e+00    

1254           +1             O1             1000           3.71429e+05    1.04811e-01    0.00000e+00    

1255           +1             O1             1000           4.28571e+05    1.04811e-01    0.00000e+00    

1256           +1             O1             1000           4.85714e+05    1.04811e-01    0.00000e+00    

1257           +1             O1             1000           5.42857e+05    1.04811e-01    0.00000e+00    

1258           +1             O1             1000           6.00000e+05    1.04811e-01    1.90000e+00    

1259           +1             O1             1000           6.57143e+05    1.04811e-01    9.80000e+00    

125            +1             O1             1000           1.57143e+06    1.20679e-02    0.00000e+00    

1260           +1             O1             1000           7.14286e+05    1.04811e-01    1.82000e+01    

1261           +1             O1             1000           7.71429e+05    1.04811e-01    3.15000e+01    

1262           +1             O1             1000           8.28571e+05    1.04811e-01    4.64000e+01    

1263           +1             O1             1000           8.85714e+05    1.04811e-01    5.34000e+01    

1264           +1             O1             1000           9.42857e+05    1.04811e-01    6.05000e+01    

1265           +1             O1             1000           1.00000e+06    1.04811e-01    6.92000e+01    

1266           +1             O1             1000           1.05714e+06    1.04811e-01    7.93000e+01    

1267           +1             O1             1000           1.11429e+06    1.04811e-01    8.02000e+01    

1268           +1             O1             1000           1.17143e+06    1.04811e-01    8.50000e+01    

1269           +1             O1             1000           1.22857e+06    1.04811e-01    8.57000e+01    

126            +1             O1             1000           1.62857e+06    1.20679e-02    0.00000e+00    

1270           +1             O1             1000           1.28571e+06    1.04811e-01    8.93000e+01    

1271           +1             O1             1000           1.34286e+06    1.04811e-01    9.25000e+01    

1272           +1             O1             1000           1.40000e+06    1.04811e-01    9.29000e+01    

1273           +1             O1             1000           1.45714e+06    1.04811e-01    9.25000e+01    

1274           +1             O1             1000           1.51429e+06    1.04811e-01    9.70000e+01    

1275           +1             O1             1000           1.57143e+06    1.04811e-01    9.57000e+01    

1276           +1             O1             1000           1.62857e+06    1.04811e-01    9.63000e+01    

1277           +1             O1             1000           1.68571e+06    1.04811e-01    9.68000e+01    

1278           +1             O1             1000           1.74286e+06    1.04811e-01    9.72000e+01    

1279           +1             O1             1000           1.80000e+06    1.04811e-01    9.82000e+01    

127            +1             O1             1000           1.68571e+06    1.20679e-02    0.00000e+00    

1280           +1             O1             1000           1.85714e+06    1.04811e-01    9.82000e+01    

1281           +1             O1             1000           1.91429e+06    1.04811e-01    9.81000e+01    

1282           +1             O1             1000           1.97143e+06    1.04811e-01    9.82000e+01    

1283           +1             O1             1000           2.02857e+06    1.04811e-01    9.85000e+01    

1284           +1             O1             1000           2.08571e+06    1.04811e-01    9.91000e+01    

1285           +1             O1             1000           2.14286e+06    1.04811e-01    9.88000e+01    

1286           +1             O1             1000           2.20000e+06    1.04811e-01    9.87000e+01    

1287           +1             O1             1000           2.25714e+06    1.04811e-01    9.92000e+01    

1288           +1             O1             1000           2.31429e+06    1.04811e-01    9.87000e+01    

1289           +1             O1             1000           2.37143e+06    1.04811e-01    9.94000e+01    

128            +1             O1             1000           1.74286e+06    1.20679e-02    0.00000e+00    

1290           +1             O1             1000           2.42857e+06    1.04811e-01    9.98000e+01    

1291           +1             O1             1000           2.48571e+06    1.04811e-01    9.95000e+01    

1292           +1             O1             1000           2.54286e+06    1.04811e-01    9.96000e+01    

1293           +1             O1             1000           2.60000e+06    1.04811e-01    9.93000e+01    

1294           +1             O1             1000           2.65714e+06    1.04811e-01    9.93000e+01    

1295           +1             O1             1000           2.71429e+06    1.04811e-01    9.94000e+01    

1296           +1             O1             1000           2.77143e+06    1.04811e-01    9.97000e+01    

1297           +1             O1             1000           2.82857e+06    1.04811e-01    9.94000e+01    

1298           +1             O1             1000           2.88571e+06    1.04811e-01    9.99000e+01    

1299           +1             O1             1000           2.94286e+06    1.04811e-01    9.95000e+01    

129            +1             O1             1000           1.80000e+06    1.20679e-02    0.00000e+00    

12             +1             O1             1000           8.28571e+05    1.00000e-02    0.00000e+00    

1300           +1             O1             1000           3.00000e+06    1.04811e-01    9.96000e+01    

1301           +1             O1             1000           2.00000e+05    1.15140e-01    0.00000e+00    

1302           +1             O1             1000           2.57143e+05    1.15140e-01    0.00000e+00    

1303           +1             O1             1000           3.14286e+05    1.15140e-01    0.00000e+00    

1304           +1             O1             1000           3.71429e+05    1.15140e-01    0.00000e+00    

1305           +1             O1             1000           4.28571e+05    1.15140e-01    0.00000e+00    

1306           +1             O1             1000           4.85714e+05    1.15140e-01    0.00000e+00    

1307           +1             O1             1000           5.42857e+05    1.15140e-01    1.30000e+00    

1308           +1             O1             1000           6.00000e+05    1.15140e-01    6.00000e+00    

1309           +1             O1             1000           6.57143e+05    1.15140e-01    1.55000e+01    

130            +1             O1             1000           1.85714e+06    1.20679e-02    0.00000e+00    

1310           +1             O1             1000           7.14286e+05    1.15140e-01    3.08000e+01    

1311           +1             O1             1000           7.71429e+05    1.15140e-01    4.30000e+01    

1312           +1             O1             1000           8.28571e+05    1.15140e-01    5.69000e+01    

1313           +1             O1             1000           8.85714e+05    1.15140e-01    6.26000e+01    

1314           +1             O1             1000           9.42857e+05    1.15140e-01    7.27000e+01    

1315           +1             O1             1000           1.00000e+06    1.15140e-01    7.83000e+01    

1316           +1             O1             1000           1.05714e+06    1.15140e-01    8.12000e+01    

1317           +1             O1             1000           1.11429e+06    1.15140e-01    8.56000e+01    

1318           +1             O1             1000           1.17143e+06    1.15140e-01    8.99000e+01    

1319           +1             O1             1000           1.22857e+06    1.15140e-01    9.01000e+01    

131            +1             O1             1000           1.91429e+06    1.20679e-02    0.00000e+00    

1320           +1             O1             1000           1.28571e+06    1.15140e-01    9.25000e+01    

1321           +1             O1             1000           1.34286e+06    1.15140e-01    9.42000e+01    

1322           +1             O1             1000           1.40000e+06    1.15140e-01    9.51000e+01    

1323           +1             O1             1000           1.45714e+06    1.15140e-01    9.62000e+01    

1324           +1             O1             1000           1.51429e+06    1.15140e-01    9.60000e+01    

1325           +1             O1             1000           1.57143e+06    1.15140e-01    9.77000e+01    

1326           +1             O1             1000           1.62857e+06    1.15140e-01    9.79000e+01    

1327           +1             O1             1000           1.68571e+06    1.15140e-01    9.73000e+01    

1328           +1             O1             1000           1.74286e+06    1.15140e-01    9.78000e+01    

1329           +1             O1             1000           1.80000e+06    1.15140e-01    9.89000e+01    

132            +1             O1             1000           1.97143e+06    1.20679e-02    0.00000e+00    

1330           +1             O1             1000           1.85714e+06    1.15140e-01    9.91000e+01    

1331           +1             O1             1000           1.91429e+06    1.15140e-01    9.87000e+01    

1332           +1             O1             1000           1.97143e+06    1.15140e-01    9.88000e+01    

1333           +1             O1             1000           2.02857e+06    1.15140e-01    9.95000e+01    

1334           +1             O1             1000           2.08571e+06    1.15140e-01    9.90000e+01    

1335           +1             O1             1000           2.14286e+06    1.15140e-01    9.89000e+01    

1336           +1             O1             1000           2.20000e+06    1.15140e-01    9.91000e+01    

1337           +1             O1             1000           2.25714e+06    1.15140e-01    9.91000e+01    

1338           +1             O1             1000           2.31429e+06    1.15140e-01    9.94000e+01    

1339           +1             O1             1000           2.37143e+06    1.15140e-01    9.86000e+01    

133            +1             O1             1000           2.02857e+06    1.20679e-02    0.00000e+00    

1340           +1             O1             1000           2.42857e+06    1.15140e-01    9.95000e+01    

1341           +1             O1             1000           2.48571e+06    1.15140e-01    9.94000e+01    

1342           +1             O1             1000           2.54286e+06    1.15140e-01    9.99000e+01    

1343           +1             O1             1000           2.60000e+06    1.15140e-01    9.97000e+01    

1344           +1             O1             1000           2.65714e+06    1.15140e-01    9.96000e+01    

1345           +1             O1             1000           2.71429e+06    1.15140e-01    9.97000e+01    

1346           +1             O1             1000           2.77143e+06    1.15140e-01    9.98000e+01    

1347           +1             O1             1000           2.82857e+06    1.15140e-01    9.97000e+01    

1348           +1             O1             1000           2.88571e+06    1.15140e-01    9.97000e+01    

1349           +1             O1             1000           2.94286e+06    1.15140e-01    9.96000e+01    

134            +1             O1             1000           2.08571e+06    1.20679e-02    0.00000e+00    

1350           +1             O1             1000           3.00000e+06    1.15140e-01    1.00000e+02    

1351           +1             O1             1000           2.00000e+05    1.26486e-01    0.00000e+00    

1352           +1             O1             1000           2.57143e+05    1.26486e-01    0.00000e+00    

1353           +1             O1             1000           3.14286e+05    1.26486e-01    0.00000e+00    

1354           +1             O1             1000           3.71429e+05    1.26486e-01    0.00000e+00    

1355           +1             O1             1000           4.28571e+05    1.26486e-01    0.00000e+00    

1356           +1             O1             1000           4.85714e+05    1.26486e-01    1.00000e-01    

1357           +1             O1             1000           5.42857e+05    1.26486e-01    2.60000e+00    

1358           +1             O1             1000           6.00000e+05    1.26486e-01    1.48000e+01    

1359           +1             O1             1000           6.57143e+05    1.26486e-01    2.75000e+01    

135            +1             O1             1000           2.14286e+06    1.20679e-02    0.00000e+00    

1360           +1             O1             1000           7.14286e+05    1.26486e-01    3.87000e+01    

1361           +1             O1             1000           7.71429e+05    1.26486e-01    5.09000e+01    

1362           +1             O1             1000           8.28571e+05    1.26486e-01    6.64000e+01    

1363           +1             O1             1000           8.85714e+05    1.26486e-01    7.09000e+01    

1364           +1             O1             1000           9.42857e+05    1.26486e-01    7.90000e+01    

1365           +1             O1             1000           1.00000e+06    1.26486e-01    8.47000e+01    

1366           +1             O1             1000           1.05714e+06    1.26486e-01    8.56000e+01    

1367           +1             O1             1000           1.11429e+06    1.26486e-01    8.97000e+01    

1368           +1             O1             1000           1.17143e+06    1.26486e-01    9.11000e+01    

1369           +1             O1             1000           1.22857e+06    1.26486e-01    9.54000e+01    

136            +1             O1             1000           2.20000e+06    1.20679e-02    0.00000e+00    

1370           +1             O1             1000           1.28571e+06    1.26486e-01    9.49000e+01    

1371           +1             O1             1000           1.34286e+06    1.26486e-01    9.57000e+01    

1372           +1             O1             1000           1.40000e+06    1.26486e-01    9.65000e+01    

1373           +1             O1             1000           1.45714e+06    1.26486e-01    9.77000e+01    

1374           +1             O1             1000           1.51429e+06    1.26486e-01    9.73000e+01    

1375           +1             O1             1000           1.57143e+06    1.26486e-01    9.83000e+01    

1376           +1             O1             1000           1.62857e+06    1.26486e-01    9.82000e+01    

1377           +1             O1             1000           1.68571e+06    1.26486e-01    9.85000e+01    

1378           +1             O1             1000           1.74286e+06    1.26486e-01    9.90000e+01    

1379           +1             O1             1000           1.80000e+06    1.26486e-01    9.89000e+01    

137            +1             O1             1000           2.25714e+06    1.20679e-02    0.00000e+00    

1380           +1             O1             1000           1.85714e+06    1.26486e-01    9.91000e+01    

1381           +1             O1             1000           1.91429e+06    1.26486e-01    9.93000e+01    

1382           +1             O1             1000           1.97143e+06    1.26486e-01    9.89000e+01    

1383           +1             O1             1000           2.02857e+06    1.26486e-01    9.94000e+01    

1384           +1             O1             1000           2.08571e+06    1.26486e-01    9.91000e+01    

1385           +1             O1             1000           2.14286e+06    1.26486e-01    9.94000e+01    

1386           +1             O1             1000           2.20000e+06    1.26486e-01    9.87000e+01    

1387           +1             O1             1000           2.25714e+06    1.26486e-01    9.94000e+01    

1388           +1             O1             1000           2.31429e+06    1.26486e-01    9.95000e+01    

1389           +1             O1             1000           2.37143e+06    1.26486e-01    9.93000e+01    

138            +1             O1             1000           2.31429e+06    1.20679e-02    0.00000e+00    

1390           +1             O1             1000           2.42857e+06    1.26486e-01    9.92000e+01    

1391           +1             O1             1000           2.48571e+06    1.26486e-01    9.95000e+01    

1392           +1             O1             1000           2.54286e+06    1.26486e-01    9.98000e+01    

1393           +1             O1             1000           2.60000e+06    1.26486e-01    9.96000e+01    

1394           +1             O1             1000           2.65714e+06    1.26486e-01    9.97000e+01    

1395           +1             O1             1000           2.71429e+06    1.26486e-01    9.98000e+01    

1396           +1             O1             1000           2.77143e+06    1.26486e-01    9.96000e+01    

1397           +1             O1             1000           2.82857e+06    1.26486e-01    9.97000e+01    

1398           +1             O1             1000           2.88571e+06    1.26486e-01    9.97000e+01    

1399           +1             O1             1000           2.94286e+06    1.26486e-01    9.99000e+01    

139            +1             O1             1000           2.37143e+06    1.20679e-02    0.00000e+00    

13             +1             O1             1000           8.85714e+05    1.00000e-02    0.00000e+00    

1400           +1             O1             1000           3.00000e+06    1.26486e-01    9.97000e+01    

1401           +1             O1             1000           2.00000e+05    1.38950e-01    0.00000e+00    

1402           +1             O1             1000           2.57143e+05    1.38950e-01    0.00000e+00    

1403           +1             O1             1000           3.14286e+05    1.38950e-01    0.00000e+00    

1404           +1             O1             1000           3.71429e+05    1.38950e-01    0.00000e+00    

1405           +1             O1             1000           4.28571e+05    1.38950e-01    0.00000e+00    

1406           +1             O1             1000           4.85714e+05    1.38950e-01    1.30000e+00    

1407           +1             O1             1000           5.42857e+05    1.38950e-01    7.20000e+00    

1408           +1             O1             1000           6.00000e+05    1.38950e-01    2.09000e+01    

1409           +1             O1             1000           6.57143e+05    1.38950e-01    3.71000e+01    

140            +1             O1             1000           2.42857e+06    1.20679e-02    0.00000e+00    

1410           +1             O1             1000           7.14286e+05    1.38950e-01    5.40000e+01    

1411           +1             O1             1000           7.71429e+05    1.38950e-01    6.26000e+01    

1412           +1             O1             1000           8.28571e+05    1.38950e-01    7.51000e+01    

1413           +1             O1             1000           8.85714e+05    1.38950e-01    7.93000e+01    

1414           +1             O1             1000           9.42857e+05    1.38950e-01    8.39000e+01    

1415           +1             O1             1000           1.00000e+06    1.38950e-01    8.91000e+01    

1416           +1             O1             1000           1.05714e+06    1.38950e-01    9.06000e+01    

1417           +1             O1             1000           1.11429e+06    1.38950e-01    9.26000e+01    

1418           +1             O1             1000           1.17143e+06    1.38950e-01    9.39000e+01    

1419           +1             O1             1000           1.22857e+06    1.38950e-01    9.53000e+01    

141            +1             O1             1000           2.48571e+06    1.20679e-02    0.00000e+00    

1420           +1             O1             1000           1.28571e+06    1.38950e-01    9.71000e+01    

1421           +1             O1             1000           1.34286e+06    1.38950e-01    9.71000e+01    

1422           +1             O1             1000           1.40000e+06    1.38950e-01    9.77000e+01    

1423           +1             O1             1000           1.45714e+06    1.38950e-01    9.78000e+01    

1424           +1             O1             1000           1.51429e+06    1.38950e-01    9.86000e+01    

1425           +1             O1             1000           1.57143e+06    1.38950e-01    9.78000e+01    

1426           +1             O1             1000           1.62857e+06    1.38950e-01    9.91000e+01    

1427           +1             O1             1000           1.68571e+06    1.38950e-01    9.88000e+01    

1428           +1             O1             1000           1.74286e+06    1.38950e-01    9.86000e+01    

1429           +1             O1             1000           1.80000e+06    1.38950e-01    9.87000e+01    

142            +1             O1             1000           2.54286e+06    1.20679e-02    0.00000e+00    

1430           +1             O1             1000           1.85714e+06    1.38950e-01    9.97000e+01    

1431           +1             O1             1000           1.91429e+06    1.38950e-01    9.93000e+01    

1432           +1             O1             1000           1.97143e+06    1.38950e-01    9.94000e+01    

1433           +1             O1             1000           2.02857e+06    1.38950e-01    9.97000e+01    

1434           +1             O1             1000           2.08571e+06    1.38950e-01    9.96000e+01    

1435           +1             O1             1000           2.14286e+06    1.38950e-01    9.99000e+01    

1436           +1             O1             1000           2.20000e+06    1.38950e-01    9.99000e+01    

1437           +1             O1             1000           2.25714e+06    1.38950e-01    9.97000e+01    

1438           +1             O1             1000           2.31429e+06    1.38950e-01    9.98000e+01    

1439           +1             O1             1000           2.37143e+06    1.38950e-01    9.96000e+01    

143            +1             O1             1000           2.60000e+06    1.20679e-02    0.00000e+00    

1440           +1             O1             1000           2.42857e+06    1.38950e-01    9.93000e+01    

1441           +1             O1             1000           2.48571e+06    1.38950e-01    9.98000e+01    

1442           +1             O1             1000           2.54286e+06    1.38950e-01    9.98000e+01    

1443           +1             O1             1000           2.60000e+06    1.38950e-01    9.99000e+01    

1444           +1             O1             1000           2.65714e+06    1.38950e-01    9.98000e+01    

1445           +1             O1             1000           2.71429e+06    1.38950e-01    9.98000e+01    

1446           +1             O1             1000           2.77143e+06    1.38950e-01    9.98000e+01    

1447           +1             O1             1000           2.82857e+06    1.38950e-01    9.97000e+01    

1448           +1             O1             1000           2.88571e+06    1.38950e-01    1.00000e+02    

1449           +1             O1             1000           2.94286e+06    1.38950e-01    9.96000e+01    

144            +1             O1             1000           2.65714e+06    1.20679e-02    0.00000e+00    

1450           +1             O1             1000           3.00000e+06    1.38950e-01    9.97000e+01    

1451           +1             O1             1000           2.00000e+05    1.52642e-01    0.00000e+00    

1452           +1             O1             1000           2.57143e+05    1.52642e-01    0.00000e+00    

1453           +1             O1             1000           3.14286e+05    1.52642e-01    0.00000e+00    

1454           +1             O1             1000           3.71429e+05    1.52642e-01    0.00000e+00    

1455           +1             O1             1000           4.28571e+05    1.52642e-01    2.00000e-01    

1456           +1             O1             1000           4.85714e+05    1.52642e-01    2.50000e+00    

1457           +1             O1             1000           5.42857e+05    1.52642e-01    1.28000e+01    

1458           +1             O1             1000           6.00000e+05    1.52642e-01    2.89000e+01    

1459           +1             O1             1000           6.57143e+05    1.52642e-01    4.55000e+01    

145            +1             O1             1000           2.71429e+06    1.20679e-02    0.00000e+00    

1460           +1             O1             1000           7.14286e+05    1.52642e-01    6.07000e+01    

1461           +1             O1             1000           7.71429e+05    1.52642e-01    7.41000e+01    

1462           +1             O1             1000           8.28571e+05    1.52642e-01    7.90000e+01    

1463           +1             O1             1000           8.85714e+05    1.52642e-01    8.58000e+01    

1464           +1             O1             1000           9.42857e+05    1.52642e-01    8.92000e+01    

1465           +1             O1             1000           1.00000e+06    1.52642e-01    9.31000e+01    

1466           +1             O1             1000           1.05714e+06    1.52642e-01    9.31000e+01    

1467           +1             O1             1000           1.11429e+06    1.52642e-01    9.47000e+01    

1468           +1             O1             1000           1.17143e+06    1.52642e-01    9.65000e+01    

1469           +1             O1             1000           1.22857e+06    1.52642e-01    9.63000e+01    

146            +1             O1             1000           2.77143e+06    1.20679e-02    0.00000e+00    

1470           +1             O1             1000           1.28571e+06    1.52642e-01    9.73000e+01    

1471           +1             O1             1000           1.34286e+06    1.52642e-01    9.85000e+01    

1472           +1             O1             1000           1.40000e+06    1.52642e-01    9.83000e+01    

1473           +1             O1             1000           1.45714e+06    1.52642e-01    9.93000e+01    

1474           +1             O1             1000           1.51429e+06    1.52642e-01    9.91000e+01    

1475           +1             O1             1000           1.57143e+06    1.52642e-01    9.87000e+01    

1476           +1             O1             1000           1.62857e+06    1.52642e-01    9.95000e+01    

1477           +1             O1             1000           1.68571e+06    1.52642e-01    9.93000e+01    

1478           +1             O1             1000           1.74286e+06    1.52642e-01    9.96000e+01    

1479           +1             O1             1000           1.80000e+06    1.52642e-01    9.94000e+01    

147            +1             O1             1000           2.82857e+06    1.20679e-02    0.00000e+00    

1480           +1             O1             1000           1.85714e+06    1.52642e-01    9.96000e+01    

1481           +1             O1             1000           1.91429e+06    1.52642e-01    9.94000e+01    

1482           +1             O1             1000           1.97143e+06    1.52642e-01    9.96000e+01    

1483           +1             O1             1000           2.02857e+06    1.52642e-01    9.95000e+01    

1484           +1             O1             1000           2.08571e+06    1.52642e-01    9.97000e+01    

1485           +1             O1             1000           2.14286e+06    1.52642e-01    9.95000e+01    

1486           +1             O1             1000           2.20000e+06    1.52642e-01    9.98000e+01    

1487           +1             O1             1000           2.25714e+06    1.52642e-01    9.97000e+01    

1488           +1             O1             1000           2.31429e+06    1.52642e-01    9.98000e+01    

1489           +1             O1             1000           2.37143e+06    1.52642e-01    9.95000e+01    

148            +1             O1             1000           2.88571e+06    1.20679e-02    0.00000e+00    

1490           +1             O1             1000           2.42857e+06    1.52642e-01    9.97000e+01    

1491           +1             O1             1000           2.48571e+06    1.52642e-01    9.99000e+01    

1492           +1             O1             1000           2.54286e+06    1.52642e-01    9.98000e+01    

1493           +1             O1             1000           2.60000e+06    1.52642e-01    9.99000e+01    

1494           +1             O1             1000           2.65714e+06    1.52642e-01    9.99000e+01    

1495           +1             O1             1000           2.71429e+06    1.52642e-01    1.00000e+02    

1496           +1             O1             1000           2.77143e+06    1.52642e-01    9.99000e+01    

1497           +1             O1             1000           2.82857e+06    1.52642e-01    9.99000e+01    

1498           +1             O1             1000           2.88571e+06    1.52642e-01    9.99000e+01    

1499           +1             O1             1000           2.94286e+06    1.52642e-01    9.99000e+01    

149            +1             O1             1000           2.94286e+06    1.20679e-02    0.00000e+00    

14             +1             O1             1000           9.42857e+05    1.00000e-02    0.00000e+00    

1500           +1             O1             1000           3.00000e+06    1.52642e-01    9.98000e+01    

1501           +1             O1             1000           2.00000e+05    1.67683e-01    0.00000e+00    

1502           +1             O1             1000           2.57143e+05    1.67683e-01    0.00000e+00    

1503           +1             O1             1000           3.14286e+05    1.67683e-01    0.00000e+00    

1504           +1             O1             1000           3.71429e+05    1.67683e-01    0.00000e+00    

1505           +1             O1             1000           4.28571e+05    1.67683e-01    4.00000e-01    

1506           +1             O1             1000           4.85714e+05    1.67683e-01    5.80000e+00    

1507           +1             O1             1000           5.42857e+05    1.67683e-01    2.62000e+01    

1508           +1             O1             1000           6.00000e+05    1.67683e-01    4.07000e+01    

1509           +1             O1             1000           6.57143e+05    1.67683e-01    5.66000e+01    

150            +1             O1             1000           3.00000e+06    1.20679e-02    0.00000e+00    

1510           +1             O1             1000           7.14286e+05    1.67683e-01    7.09000e+01    

1511           +1             O1             1000           7.71429e+05    1.67683e-01    7.79000e+01    

1512           +1             O1             1000           8.28571e+05    1.67683e-01    8.68000e+01    

1513           +1             O1             1000           8.85714e+05    1.67683e-01    8.77000e+01    

1514           +1             O1             1000           9.42857e+05    1.67683e-01    9.40000e+01    

1515           +1             O1             1000           1.00000e+06    1.67683e-01    9.44000e+01    

1516           +1             O1             1000           1.05714e+06    1.67683e-01    9.52000e+01    

1517           +1             O1             1000           1.11429e+06    1.67683e-01    9.67000e+01    

1518           +1             O1             1000           1.17143e+06    1.67683e-01    9.72000e+01    

1519           +1             O1             1000           1.22857e+06    1.67683e-01    9.83000e+01    

151            +1             O1             1000           2.00000e+05    1.32571e-02    0.00000e+00    

1520           +1             O1             1000           1.28571e+06    1.67683e-01    9.84000e+01    

1521           +1             O1             1000           1.34286e+06    1.67683e-01    9.81000e+01    

1522           +1             O1             1000           1.40000e+06    1.67683e-01    9.89000e+01    

1523           +1             O1             1000           1.45714e+06    1.67683e-01    9.94000e+01    

1524           +1             O1             1000           1.51429e+06    1.67683e-01    9.94000e+01    

1525           +1             O1             1000           1.57143e+06    1.67683e-01    9.91000e+01    

1526           +1             O1             1000           1.62857e+06    1.67683e-01    9.86000e+01    

1527           +1             O1             1000           1.68571e+06    1.67683e-01    9.96000e+01    

1528           +1             O1             1000           1.74286e+06    1.67683e-01    9.98000e+01    

1529           +1             O1             1000           1.80000e+06    1.67683e-01    9.98000e+01    

152            +1             O1             1000           2.57143e+05    1.32571e-02    0.00000e+00    

1530           +1             O1             1000           1.85714e+06    1.67683e-01    9.99000e+01    

1531           +1             O1             1000           1.91429e+06    1.67683e-01    9.96000e+01    

1532           +1             O1             1000           1.97143e+06    1.67683e-01    9.96000e+01    

1533           +1             O1             1000           2.02857e+06    1.67683e-01    1.00000e+02    

1534           +1             O1             1000           2.08571e+06    1.67683e-01    9.98000e+01    

1535           +1             O1             1000           2.14286e+06    1.67683e-01    9.97000e+01    

1536           +1             O1             1000           2.20000e+06    1.67683e-01    1.00000e+02    

1537           +1             O1             1000           2.25714e+06    1.67683e-01    1.00000e+02    

1538           +1             O1             1000           2.31429e+06    1.67683e-01    9.99000e+01    

1539           +1             O1             1000           2.37143e+06    1.67683e-01    1.00000e+02    

153            +1             O1             1000           3.14286e+05    1.32571e-02    0.00000e+00    

1540           +1             O1             1000           2.42857e+06    1.67683e-01    9.99000e+01    

1541           +1             O1             1000           2.48571e+06    1.67683e-01    1.00000e+02    

1542           +1             O1             1000           2.54286e+06    1.67683e-01    9.99000e+01    

1543           +1             O1             1000           2.60000e+06    1.67683e-01    9.99000e+01    

1544           +1             O1             1000           2.65714e+06    1.67683e-01    9.98000e+01    

1545           +1             O1             1000           2.71429e+06    1.67683e-01    9.98000e+01    

1546           +1             O1             1000           2.77143e+06    1.67683e-01    1.00000e+02    

1547           +1             O1             1000           2.82857e+06    1.67683e-01    9.98000e+01    

1548           +1             O1             1000           2.88571e+06    1.67683e-01    9.99000e+01    

1549           +1             O1             1000           2.94286e+06    1.67683e-01    1.00000e+02    

154            +1             O1             1000           3.71429e+05    1.32571e-02    0.00000e+00    

1550           +1             O1             1000           3.00000e+06    1.67683e-01    9.99000e+01    

1551           +1             O1             1000           2.00000e+05    1.84207e-01    0.00000e+00    

1552           +1             O1             1000           2.57143e+05    1.84207e-01    0.00000e+00    

1553           +1             O1             1000           3.14286e+05    1.84207e-01    0.00000e+00    

1554           +1             O1             1000           3.71429e+05    1.84207e-01    0.00000e+00    

1555           +1             O1             1000           4.28571e+05    1.84207e-01    1.40000e+00    

1556           +1             O1             1000           4.85714e+05    1.84207e-01    1.33000e+01    

1557           +1             O1             1000           5.42857e+05    1.84207e-01    3.11000e+01    

1558           +1             O1             1000           6.00000e+05    1.84207e-01    5.38000e+01    

1559           +1             O1             1000           6.57143e+05    1.84207e-01    6.72000e+01    

155            +1             O1             1000           4.28571e+05    1.32571e-02    0.00000e+00    

1560           +1             O1             1000           7.14286e+05    1.84207e-01    7.61000e+01    

1561           +1             O1             1000           7.71429e+05    1.84207e-01    8.53000e+01    

1562           +1             O1             1000           8.28571e+05    1.84207e-01    8.79000e+01    

1563           +1             O1             1000           8.85714e+05    1.84207e-01    9.27000e+01    

1564           +1             O1             1000           9.42857e+05    1.84207e-01    9.32000e+01    

1565           +1             O1             1000           1.00000e+06    1.84207e-01    9.60000e+01    

1566           +1             O1             1000           1.05714e+06    1.84207e-01    9.70000e+01    

1567           +1             O1             1000           1.11429e+06    1.84207e-01    9.71000e+01    

1568           +1             O1             1000           1.17143e+06    1.84207e-01    9.76000e+01    

1569           +1             O1             1000           1.22857e+06    1.84207e-01    9.84000e+01    

156            +1             O1             1000           4.85714e+05    1.32571e-02    0.00000e+00    

1570           +1             O1             1000           1.28571e+06    1.84207e-01    9.92000e+01    

1571           +1             O1             1000           1.34286e+06    1.84207e-01    9.88000e+01    

1572           +1             O1             1000           1.40000e+06    1.84207e-01    9.91000e+01    

1573           +1             O1             1000           1.45714e+06    1.84207e-01    9.94000e+01    

1574           +1             O1             1000           1.51429e+06    1.84207e-01    9.99000e+01    

1575           +1             O1             1000           1.57143e+06    1.84207e-01    9.95000e+01    

1576           +1             O1             1000           1.62857e+06    1.84207e-01    9.94000e+01    

1577           +1             O1             1000           1.68571e+06    1.84207e-01    9.97000e+01    

1578           +1             O1             1000           1.74286e+06    1.84207e-01    9.97000e+01    

1579           +1             O1             1000           1.80000e+06    1.84207e-01    1.00000e+02    

157            +1             O1             1000           5.42857e+05    1.32571e-02    0.00000e+00    

1580           +1             O1             1000           1.85714e+06    1.84207e-01    9.98000e+01    

1581           +1             O1             1000           1.91429e+06    1.84207e-01    9.95000e+01    

1582           +1             O1             1000           1.97143e+06    1.84207e-01    1.00000e+02    

1583           +1             O1             1000           2.02857e+06    1.84207e-01    9.98000e+01    

1584           +1             O1             1000           2.08571e+06    1.84207e-01    1.00000e+02    

1585           +1             O1             1000           2.14286e+06    1.84207e-01    9.98000e+01    

1586           +1             O1             1000           2.20000e+06    1.84207e-01    9.98000e+01    

1587           +1             O1             1000           2.25714e+06    1.84207e-01    9.99000e+01    

1588           +1             O1             1000           2.31429e+06    1.84207e-01    1.00000e+02    

1589           +1             O1             1000           2.37143e+06    1.84207e-01    1.00000e+02    

158            +1             O1             1000           6.00000e+05    1.32571e-02    0.00000e+00    

1590           +1             O1             1000           2.42857e+06    1.84207e-01    1.00000e+02    

1591           +1             O1             1000           2.48571e+06    1.84207e-01    9.99000e+01    

1592           +1             O1             1000           2.54286e+06    1.84207e-01    9.99000e+01    

1593           +1             O1             1000           2.60000e+06    1.84207e-01    1.00000e+02    

1594           +1             O1             1000           2.65714e+06    1.84207e-01    9.99000e+01    

1595           +1             O1             1000           2.71429e+06    1.84207e-01    9.99000e+01    

1596           +1             O1             1000           2.77143e+06    1.84207e-01    1.00000e+02    

1597           +1             O1             1000           2.82857e+06    1.84207e-01    9.99000e+01    

1598           +1             O1             1000           2.88571e+06    1.84207e-01    1.00000e+02    

1599           +1             O1             1000           2.94286e+06    1.84207e-01    1.00000e+02    

159            +1             O1             1000           6.57143e+05    1.32571e-02    0.00000e+00    

15             +1             O1             1000           1.00000e+06    1.00000e-02    0.00000e+00    

1600           +1             O1             1000           3.00000e+06    1.84207e-01    1.00000e+02    

1601           +1             O1             1000           2.00000e+05    2.02359e-01    0.00000e+00    

1602           +1             O1             1000           2.57143e+05    2.02359e-01    0.00000e+00    

1603           +1             O1             1000           3.14286e+05    2.02359e-01    0.00000e+00    

1604           +1             O1             1000           3.71429e+05    2.02359e-01    1.00000e-01    

1605           +1             O1             1000           4.28571e+05    2.02359e-01    4.30000e+00    

1606           +1             O1             1000           4.85714e+05    2.02359e-01    1.94000e+01    

1607           +1             O1             1000           5.42857e+05    2.02359e-01    4.08000e+01    

1608           +1             O1             1000           6.00000e+05    2.02359e-01    6.11000e+01    

1609           +1             O1             1000           6.57143e+05    2.02359e-01    7.25000e+01    

160            +1             O1             1000           7.14286e+05    1.32571e-02    0.00000e+00    

1610           +1             O1             1000           7.14286e+05    2.02359e-01    8.35000e+01    

1611           +1             O1             1000           7.71429e+05    2.02359e-01    8.82000e+01    

1612           +1             O1             1000           8.28571e+05    2.02359e-01    9.11000e+01    

1613           +1             O1             1000           8.85714e+05    2.02359e-01    9.37000e+01    

1614           +1             O1             1000           9.42857e+05    2.02359e-01    9.56000e+01    

1615           +1             O1             1000           1.00000e+06    2.02359e-01    9.65000e+01    

1616           +1             O1             1000           1.05714e+06    2.02359e-01    9.88000e+01    

1617           +1             O1             1000           1.11429e+06    2.02359e-01    9.87000e+01    

1618           +1             O1             1000           1.17143e+06    2.02359e-01    9.82000e+01    

1619           +1             O1             1000           1.22857e+06    2.02359e-01    9.93000e+01    

161            +1             O1             1000           7.71429e+05    1.32571e-02    0.00000e+00    

1620           +1             O1             1000           1.28571e+06    2.02359e-01    9.94000e+01    

1621           +1             O1             1000           1.34286e+06    2.02359e-01    1.00000e+02    

1622           +1             O1             1000           1.40000e+06    2.02359e-01    9.94000e+01    

1623           +1             O1             1000           1.45714e+06    2.02359e-01    9.93000e+01    

1624           +1             O1             1000           1.51429e+06    2.02359e-01    9.94000e+01    

1625           +1             O1             1000           1.57143e+06    2.02359e-01    9.93000e+01    

1626           +1             O1             1000           1.62857e+06    2.02359e-01    9.96000e+01    

1627           +1             O1             1000           1.68571e+06    2.02359e-01    9.97000e+01    

1628           +1             O1             1000           1.74286e+06    2.02359e-01    9.98000e+01    

1629           +1             O1             1000           1.80000e+06    2.02359e-01    9.92000e+01    

162            +1             O1             1000           8.28571e+05    1.32571e-02    0.00000e+00    

1630           +1             O1             1000           1.85714e+06    2.02359e-01    9.96000e+01    

1631           +1             O1             1000           1.91429e+06    2.02359e-01    9.97000e+01    

1632           +1             O1             1000           1.97143e+06    2.02359e-01    9.99000e+01    

1633           +1             O1             1000           2.02857e+06    2.02359e-01    1.00000e+02    

1634           +1             O1             1000           2.08571e+06    2.02359e-01    9.98000e+01    

1635           +1             O1             1000           2.14286e+06    2.02359e-01    1.00000e+02    

1636           +1             O1             1000           2.20000e+06    2.02359e-01    1.00000e+02    

1637           +1             O1             1000           2.25714e+06    2.02359e-01    1.00000e+02    

1638           +1             O1             1000           2.31429e+06    2.02359e-01    1.00000e+02    

1639           +1             O1             1000           2.37143e+06    2.02359e-01    1.00000e+02    

163            +1             O1             1000           8.85714e+05    1.32571e-02    0.00000e+00    

1640           +1             O1             1000           2.42857e+06    2.02359e-01    1.00000e+02    

1641           +1             O1             1000           2.48571e+06    2.02359e-01    9.99000e+01    

1642           +1             O1             1000           2.54286e+06    2.02359e-01    9.98000e+01    

1643           +1             O1             1000           2.60000e+06    2.02359e-01    1.00000e+02    

1644           +1             O1             1000           2.65714e+06    2.02359e-01    1.00000e+02    

1645           +1             O1             1000           2.71429e+06    2.02359e-01    9.97000e+01    

1646           +1             O1             1000           2.77143e+06    2.02359e-01    1.00000e+02    

1647           +1             O1             1000           2.82857e+06    2.02359e-01    9.99000e+01    

1648           +1             O1             1000           2.88571e+06    2.02359e-01    1.00000e+02    

1649           +1             O1             1000           2.94286e+06    2.02359e-01    9.99000e+01    

164            +1             O1             1000           9.42857e+05    1.32571e-02    0.00000e+00    

1650           +1             O1             1000           3.00000e+06    2.02359e-01    1.00000e+02    

1651           +1             O1             1000           2.00000e+05    2.22300e-01    0.00000e+00    

1652           +1             O1             1000           2.57143e+05    2.22300e-01    0.00000e+00    

1653           +1             O1             1000           3.14286e+05    2.22300e-01    0.00000e+00    

1654           +1             O1             1000           3.71429e+05    2.22300e-01    3.00000e-01    

1655           +1             O1             1000           4.28571e+05    2.22300e-01    8.30000e+00    

1656           +1             O1             1000           4.85714e+05    2.22300e-01    2.56000e+01    

1657           +1             O1             1000           5.42857e+05    2.22300e-01    5.29000e+01    

1658           +1             O1             1000           6.00000e+05    2.22300e-01    6.92000e+01    

1659           +1             O1             1000           6.57143e+05    2.22300e-01    7.77000e+01    

165            +1             O1             1000           1.00000e+06    1.32571e-02    0.00000e+00    

1660           +1             O1             1000           7.14286e+05    2.22300e-01    8.52000e+01    

1661           +1             O1             1000           7.71429e+05    2.22300e-01    9.04000e+01    

1662           +1             O1             1000           8.28571e+05    2.22300e-01    9.46000e+01    

1663           +1             O1             1000           8.85714e+05    2.22300e-01    9.68000e+01    

1664           +1             O1             1000           9.42857e+05    2.22300e-01    9.72000e+01    

1665           +1             O1             1000           1.00000e+06    2.22300e-01    9.87000e+01    

1666           +1             O1             1000           1.05714e+06    2.22300e-01    9.91000e+01    

1667           +1             O1             1000           1.11429e+06    2.22300e-01    9.93000e+01    

1668           +1             O1             1000           1.17143e+06    2.22300e-01    9.89000e+01    

1669           +1             O1             1000           1.22857e+06    2.22300e-01    9.93000e+01    

166            +1             O1             1000           1.05714e+06    1.32571e-02    0.00000e+00    

1670           +1             O1             1000           1.28571e+06    2.22300e-01    9.94000e+01    

1671           +1             O1             1000           1.34286e+06    2.22300e-01    9.94000e+01    

1672           +1             O1             1000           1.40000e+06    2.22300e-01    9.96000e+01    

1673           +1             O1             1000           1.45714e+06    2.22300e-01    9.98000e+01    

1674           +1             O1             1000           1.51429e+06    2.22300e-01    9.97000e+01    

1675           +1             O1             1000           1.57143e+06    2.22300e-01    9.97000e+01    

1676           +1             O1             1000           1.62857e+06    2.22300e-01    9.96000e+01    

1677           +1             O1             1000           1.68571e+06    2.22300e-01    9.97000e+01    

1678           +1             O1             1000           1.74286e+06    2.22300e-01    1.00000e+02    

1679           +1             O1             1000           1.80000e+06    2.22300e-01    9.96000e+01    

167            +1             O1             1000           1.11429e+06    1.32571e-02    0.00000e+00    

1680           +1             O1             1000           1.85714e+06    2.22300e-01    9.96000e+01    

1681           +1             O1             1000           1.91429e+06    2.22300e-01    9.98000e+01    

1682           +1             O1             1000           1.97143e+06    2.22300e-01    1.00000e+02    

1683           +1             O1             1000           2.02857e+06    2.22300e-01    9.95000e+01    

1684           +1             O1             1000           2.08571e+06    2.22300e-01    9.99000e+01    

1685           +1             O1             1000           2.14286e+06    2.22300e-01    9.99000e+01    

1686           +1             O1             1000           2.20000e+06    2.22300e-01    1.00000e+02    

1687           +1             O1             1000           2.25714e+06    2.22300e-01    1.00000e+02    

1688           +1             O1             1000           2.31429e+06    2.22300e-01    1.00000e+02    

1689           +1             O1             1000           2.37143e+06    2.22300e-01    1.00000e+02    

168            +1             O1             1000           1.17143e+06    1.32571e-02    0.00000e+00    

1690           +1             O1             1000           2.42857e+06    2.22300e-01    9.98000e+01    

1691           +1             O1             1000           2.48571e+06    2.22300e-01    9.99000e+01    

1692           +1             O1             1000           2.54286e+06    2.22300e-01    1.00000e+02    

1693           +1             O1             1000           2.60000e+06    2.22300e-01    1.00000e+02    

1694           +1             O1             1000           2.65714e+06    2.22300e-01    1.00000e+02    

1695           +1             O1             1000           2.71429e+06    2.22300e-01    9.97000e+01    

1696           +1             O1             1000           2.77143e+06    2.22300e-01    1.00000e+02    

1697           +1             O1             1000           2.82857e+06    2.22300e-01    9.99000e+01    

1698           +1             O1             1000           2.88571e+06    2.22300e-01    1.00000e+02    

1699           +1             O1             1000           2.94286e+06    2.22300e-01    1.00000e+02    

169            +1             O1             1000           1.22857e+06    1.32571e-02    0.00000e+00    

16             +1             O1             1000           1.05714e+06    1.00000e-02    0.00000e+00    

1700           +1             O1             1000           3.00000e+06    2.22300e-01    1.00000e+02    

1701           +1             O1             1000           2.00000e+05    2.44205e-01    0.00000e+00    

1702           +1             O1             1000           2.57143e+05    2.44205e-01    0.00000e+00    

1703           +1             O1             1000           3.14286e+05    2.44205e-01    0.00000e+00    

1704           +1             O1             1000           3.71429e+05    2.44205e-01    1.50000e+00    

1705           +1             O1             1000           4.28571e+05    2.44205e-01    1.20000e+01    

1706           +1             O1             1000           4.85714e+05    2.44205e-01    3.61000e+01    

1707           +1             O1             1000           5.42857e+05    2.44205e-01    6.10000e+01    

1708           +1             O1             1000           6.00000e+05    2.44205e-01    7.44000e+01    

1709           +1             O1             1000           6.57143e+05    2.44205e-01    8.38000e+01    

170            +1             O1             1000           1.28571e+06    1.32571e-02    0.00000e+00    

1710           +1             O1             1000           7.14286e+05    2.44205e-01    9.14000e+01    

1711           +1             O1             1000           7.71429e+05    2.44205e-01    9.42000e+01    

1712           +1             O1             1000           8.28571e+05    2.44205e-01    9.55000e+01    

1713           +1             O1             1000           8.85714e+05    2.44205e-01    9.68000e+01    

1714           +1             O1             1000           9.42857e+05    2.44205e-01    9.78000e+01    

1715           +1             O1             1000           1.00000e+06    2.44205e-01    9.83000e+01    

1716           +1             O1             1000           1.05714e+06    2.44205e-01    9.89000e+01    

1717           +1             O1             1000           1.11429e+06    2.44205e-01    9.95000e+01    

1718           +1             O1             1000           1.17143e+06    2.44205e-01    9.94000e+01    

1719           +1             O1             1000           1.22857e+06    2.44205e-01    9.94000e+01    

171            +1             O1             1000           1.34286e+06    1.32571e-02    0.00000e+00    

1720           +1             O1             1000           1.28571e+06    2.44205e-01    9.98000e+01    

1721           +1             O1             1000           1.34286e+06    2.44205e-01    9.96000e+01    

1722           +1             O1             1000           1.40000e+06    2.44205e-01    9.98000e+01    

1723           +1             O1             1000           1.45714e+06    2.44205e-01    9.99000e+01    

1724           +1             O1             1000           1.51429e+06    2.44205e-01    9.98000e+01    

1725           +1             O1             1000           1.57143e+06    2.44205e-01    9.96000e+01    

1726           +1             O1             1000           1.62857e+06    2.44205e-01    9.98000e+01    

1727           +1             O1             1000           1.68571e+06    2.44205e-01    9.99000e+01    

1728           +1             O1             1000           1.74286e+06    2.44205e-01    9.99000e+01    

1729           +1             O1             1000           1.80000e+06    2.44205e-01    1.00000e+02    

172            +1             O1             1000           1.40000e+06    1.32571e-02    0.00000e+00    

1730           +1             O1             1000           1.85714e+06    2.44205e-01    9.99000e+01    

1731           +1             O1             1000           1.91429e+06    2.44205e-01    9.99000e+01    

1732           +1             O1             1000           1.97143e+06    2.44205e-01    1.00000e+02    

1733           +1             O1             1000           2.02857e+06    2.44205e-01    9.98000e+01    

1734           +1             O1             1000           2.08571e+06    2.44205e-01    1.00000e+02    

1735           +1             O1             1000           2.14286e+06    2.44205e-01    9.98000e+01    

1736           +1             O1             1000           2.20000e+06    2.44205e-01    9.99000e+01    

1737           +1             O1             1000           2.25714e+06    2.44205e-01    9.99000e+01    

1738           +1             O1             1000           2.31429e+06    2.44205e-01    9.99000e+01    

1739           +1             O1             1000           2.37143e+06    2.44205e-01    1.00000e+02    

173            +1             O1             1000           1.45714e+06    1.32571e-02    0.00000e+00    

1740           +1             O1             1000           2.42857e+06    2.44205e-01    9.99000e+01    

1741           +1             O1             1000           2.48571e+06    2.44205e-01    1.00000e+02    

1742           +1             O1             1000           2.54286e+06    2.44205e-01    1.00000e+02    

1743           +1             O1             1000           2.60000e+06    2.44205e-01    9.99000e+01    

1744           +1             O1             1000           2.65714e+06    2.44205e-01    1.00000e+02    

1745           +1             O1             1000           2.71429e+06    2.44205e-01    9.99000e+01    

1746           +1             O1             1000           2.77143e+06    2.44205e-01    1.00000e+02    

1747           +1             O1             1000           2.82857e+06    2.44205e-01    1.00000e+02    

1748           +1             O1             1000           2.88571e+06    2.44205e-01    1.00000e+02    

1749           +1             O1             1000           2.94286e+06    2.44205e-01    9.99000e+01    

174            +1             O1             1000           1.51429e+06    1.32571e-02    0.00000e+00    

1750           +1             O1             1000           3.00000e+06    2.44205e-01    1.00000e+02    

1751           +1             O1             1000           2.00000e+05    2.68270e-01    0.00000e+00    

1752           +1             O1             1000           2.57143e+05    2.68270e-01    0.00000e+00    

1753           +1             O1             1000           3.14286e+05    2.68270e-01    0.00000e+00    

1754           +1             O1             1000           3.71429e+05    2.68270e-01    2.80000e+00    

1755           +1             O1             1000           4.28571e+05    2.68270e-01    2.01000e+01    

1756           +1             O1             1000           4.85714e+05    2.68270e-01    4.65000e+01    

1757           +1             O1             1000           5.42857e+05    2.68270e-01    6.79000e+01    

1758           +1             O1             1000           6.00000e+05    2.68270e-01    8.23000e+01    

1759           +1             O1             1000           6.57143e+05    2.68270e-01    8.90000e+01    

175            +1             O1             1000           1.57143e+06    1.32571e-02    0.00000e+00    

1760           +1             O1             1000           7.14286e+05    2.68270e-01    9.34000e+01    

1761           +1             O1             1000           7.71429e+05    2.68270e-01    9.54000e+01    

1762           +1             O1             1000           8.28571e+05    2.68270e-01    9.62000e+01    

1763           +1             O1             1000           8.85714e+05    2.68270e-01    9.80000e+01    

1764           +1             O1             1000           9.42857e+05    2.68270e-01    9.87000e+01    

1765           +1             O1             1000           1.00000e+06    2.68270e-01    9.88000e+01    

1766           +1             O1             1000           1.05714e+06    2.68270e-01    9.90000e+01    

1767           +1             O1             1000           1.11429e+06    2.68270e-01    9.89000e+01    

1768           +1             O1             1000           1.17143e+06    2.68270e-01    9.95000e+01    

1769           +1             O1             1000           1.22857e+06    2.68270e-01    9.96000e+01    

176            +1             O1             1000           1.62857e+06    1.32571e-02    0.00000e+00    

1770           +1             O1             1000           1.28571e+06    2.68270e-01    9.96000e+01    

1771           +1             O1             1000           1.34286e+06    2.68270e-01    9.96000e+01    

1772           +1             O1             1000           1.40000e+06    2.68270e-01    9.99000e+01    

1773           +1             O1             1000           1.45714e+06    2.68270e-01    9.99000e+01    

1774           +1             O1             1000           1.51429e+06    2.68270e-01    9.99000e+01    

1775           +1             O1             1000           1.57143e+06    2.68270e-01    1.00000e+02    

1776           +1             O1             1000           1.62857e+06    2.68270e-01    9.98000e+01    

1777           +1             O1             1000           1.68571e+06    2.68270e-01    9.96000e+01    

1778           +1             O1             1000           1.74286e+06    2.68270e-01    1.00000e+02    

1779           +1             O1             1000           1.80000e+06    2.68270e-01    9.98000e+01    

177            +1             O1             1000           1.68571e+06    1.32571e-02    0.00000e+00    

1780           +1             O1             1000           1.85714e+06    2.68270e-01    9.98000e+01    

1781           +1             O1             1000           1.91429e+06    2.68270e-01    1.00000e+02    

1782           +1             O1             1000           1.97143e+06    2.68270e-01    1.00000e+02    

1783           +1             O1             1000           2.02857e+06    2.68270e-01    9.99000e+01    

1784           +1             O1             1000           2.08571e+06    2.68270e-01    1.00000e+02    

1785           +1             O1             1000           2.14286e+06    2.68270e-01    1.00000e+02    

1786           +1             O1             1000           2.20000e+06    2.68270e-01    9.99000e+01    

1787           +1             O1             1000           2.25714e+06    2.68270e-01    1.00000e+02    

1788           +1             O1             1000           2.31429e+06    2.68270e-01    9.99000e+01    

1789           +1             O1             1000           2.37143e+06    2.68270e-01    1.00000e+02    

178            +1             O1             1000           1.74286e+06    1.32571e-02    0.00000e+00    

1790           +1             O1             1000           2.42857e+06    2.68270e-01    1.00000e+02    

1791           +1             O1             1000           2.48571e+06    2.68270e-01    1.00000e+02    

1792           +1             O1             1000           2.54286e+06    2.68270e-01    9.99000e+01    

1793           +1             O1             1000           2.60000e+06    2.68270e-01    1.00000e+02    

1794           +1             O1             1000           2.65714e+06    2.68270e-01    9.99000e+01    

1795           +1             O1             1000           2.71429e+06    2.68270e-01    9.99000e+01    

1796           +1             O1             1000           2.77143e+06    2.68270e-01    1.00000e+02    

1797           +1             O1             1000           2.82857e+06    2.68270e-01    9.99000e+01    

1798           +1             O1             1000           2.88571e+06    2.68270e-01    9.99000e+01    

1799           +1             O1             1000           2.94286e+06    2.68270e-01    9.98000e+01    

179            +1             O1             1000           1.80000e+06    1.32571e-02    0.00000e+00    

17             +1             O1             1000           1.11429e+06    1.00000e-02    0.00000e+00    

1800           +1             O1             1000           3.00000e+06    2.68270e-01    9.99000e+01    

1801           +1             O1             1000           2.00000e+05    2.94705e-01    0.00000e+00    

1802           +1             O1             1000           2.57143e+05    2.94705e-01    0.00000e+00    

1803           +1             O1             1000           3.14286e+05    2.94705e-01    0.00000e+00    

1804           +1             O1             1000           3.71429e+05    2.94705e-01    5.60000e+00    

1805           +1             O1             1000           4.28571e+05    2.94705e-01    2.95000e+01    

1806           +1             O1             1000           4.85714e+05    2.94705e-01    5.70000e+01    

1807           +1             O1             1000           5.42857e+05    2.94705e-01    7.56000e+01    

1808           +1             O1             1000           6.00000e+05    2.94705e-01    8.31000e+01    

1809           +1             O1             1000           6.57143e+05    2.94705e-01    8.91000e+01    

180            +1             O1             1000           1.85714e+06    1.32571e-02    0.00000e+00    

1810           +1             O1             1000           7.14286e+05    2.94705e-01    9.43000e+01    

1811           +1             O1             1000           7.71429e+05    2.94705e-01    9.78000e+01    

1812           +1             O1             1000           8.28571e+05    2.94705e-01    9.88000e+01    

1813           +1             O1             1000           8.85714e+05    2.94705e-01    9.81000e+01    

1814           +1             O1             1000           9.42857e+05    2.94705e-01    9.93000e+01    

1815           +1             O1             1000           1.00000e+06    2.94705e-01    9.95000e+01    

1816           +1             O1             1000           1.05714e+06    2.94705e-01    9.93000e+01    

1817           +1             O1             1000           1.11429e+06    2.94705e-01    9.97000e+01    

1818           +1             O1             1000           1.17143e+06    2.94705e-01    9.95000e+01    

1819           +1             O1             1000           1.22857e+06    2.94705e-01    9.98000e+01    

181            +1             O1             1000           1.91429e+06    1.32571e-02    0.00000e+00    

1820           +1             O1             1000           1.28571e+06    2.94705e-01    9.99000e+01    

1821           +1             O1             1000           1.34286e+06    2.94705e-01    9.99000e+01    

1822           +1             O1             1000           1.40000e+06    2.94705e-01    9.99000e+01    

1823           +1             O1             1000           1.45714e+06    2.94705e-01    9.99000e+01    

1824           +1             O1             1000           1.51429e+06    2.94705e-01    9.98000e+01    

1825           +1             O1             1000           1.57143e+06    2.94705e-01    9.99000e+01    

1826           +1             O1             1000           1.62857e+06    2.94705e-01    9.99000e+01    

1827           +1             O1             1000           1.68571e+06    2.94705e-01    1.00000e+02    

1828           +1             O1             1000           1.74286e+06    2.94705e-01    1.00000e+02    

1829           +1             O1             1000           1.80000e+06    2.94705e-01    1.00000e+02    

182            +1             O1             1000           1.97143e+06    1.32571e-02    0.00000e+00    

1830           +1             O1             1000           1.85714e+06    2.94705e-01    9.99000e+01    

1831           +1             O1             1000           1.91429e+06    2.94705e-01    1.00000e+02    

1832           +1             O1             1000           1.97143e+06    2.94705e-01    1.00000e+02    

1833           +1             O1             1000           2.02857e+06    2.94705e-01    1.00000e+02    

1834           +1             O1             1000           2.08571e+06    2.94705e-01    1.00000e+02    

1835           +1             O1             1000           2.14286e+06    2.94705e-01    1.00000e+02    

1836           +1             O1             1000           2.20000e+06    2.94705e-01    1.00000e+02    

1837           +1             O1             1000           2.25714e+06    2.94705e-01    1.00000e+02    

1838           +1             O1             1000           2.31429e+06    2.94705e-01    1.00000e+02    

1839           +1             O1             1000           2.37143e+06    2.94705e-01    1.00000e+02    

183            +1             O1             1000           2.02857e+06    1.32571e-02    0.00000e+00    

1840           +1             O1             1000           2.42857e+06    2.94705e-01    1.00000e+02    

1841           +1             O1             1000           2.48571e+06    2.94705e-01    1.00000e+02    

1842           +1             O1             1000           2.54286e+06    2.94705e-01    1.00000e+02    

1843           +1             O1             1000           2.60000e+06    2.94705e-01    1.00000e+02    

1844           +1             O1             1000           2.65714e+06    2.94705e-01    1.00000e+02    

1845           +1             O1             1000           2.71429e+06    2.94705e-01    9.99000e+01    

1846           +1             O1             1000           2.77143e+06    2.94705e-01    1.00000e+02    

1847           +1             O1             1000           2.82857e+06    2.94705e-01    1.00000e+02    

1848           +1             O1             1000           2.88571e+06    2.94705e-01    9.99000e+01    

1849           +1             O1             1000           2.94286e+06    2.94705e-01    1.00000e+02    

184            +1             O1             1000           2.08571e+06    1.32571e-02    0.00000e+00    

1850           +1             O1             1000           3.00000e+06    2.94705e-01    1.00000e+02    

1851           +1             O1             1000           2.00000e+05    3.23746e-01    0.00000e+00    

1852           +1             O1             1000           2.57143e+05    3.23746e-01    0.00000e+00    

1853           +1             O1             1000           3.14286e+05    3.23746e-01    3.00000e-01    

1854           +1             O1             1000           3.71429e+05    3.23746e-01    8.50000e+00    

1855           +1             O1             1000           4.28571e+05    3.23746e-01    3.60000e+01    

1856           +1             O1             1000           4.85714e+05    3.23746e-01    6.23000e+01    

1857           +1             O1             1000           5.42857e+05    3.23746e-01    7.90000e+01    

1858           +1             O1             1000           6.00000e+05    3.23746e-01    9.12000e+01    

1859           +1             O1             1000           6.57143e+05    3.23746e-01    9.37000e+01    

185            +1             O1             1000           2.14286e+06    1.32571e-02    0.00000e+00    

1860           +1             O1             1000           7.14286e+05    3.23746e-01    9.67000e+01    

1861           +1             O1             1000           7.71429e+05    3.23746e-01    9.79000e+01    

1862           +1             O1             1000           8.28571e+05    3.23746e-01    9.86000e+01    

1863           +1             O1             1000           8.85714e+05    3.23746e-01    9.84000e+01    

1864           +1             O1             1000           9.42857e+05    3.23746e-01    9.96000e+01    

1865           +1             O1             1000           1.00000e+06    3.23746e-01    9.93000e+01    

1866           +1             O1             1000           1.05714e+06    3.23746e-01    9.98000e+01    

1867           +1             O1             1000           1.11429e+06    3.23746e-01    9.99000e+01    

1868           +1             O1             1000           1.17143e+06    3.23746e-01    9.98000e+01    

1869           +1             O1             1000           1.22857e+06    3.23746e-01    9.98000e+01    

186            +1             O1             1000           2.20000e+06    1.32571e-02    0.00000e+00    

1870           +1             O1             1000           1.28571e+06    3.23746e-01    9.99000e+01    

1871           +1             O1             1000           1.34286e+06    3.23746e-01    9.98000e+01    

1872           +1             O1             1000           1.40000e+06    3.23746e-01    1.00000e+02    

1873           +1             O1             1000           1.45714e+06    3.23746e-01    1.00000e+02    

1874           +1             O1             1000           1.51429e+06    3.23746e-01    9.99000e+01    

1875           +1             O1             1000           1.57143e+06    3.23746e-01    1.00000e+02    

1876           +1             O1             1000           1.62857e+06    3.23746e-01    1.00000e+02    

1877           +1             O1             1000           1.68571e+06    3.23746e-01    1.00000e+02    

1878           +1             O1             1000           1.74286e+06    3.23746e-01    1.00000e+02    

1879           +1             O1             1000           1.80000e+06    3.23746e-01    1.00000e+02    

187            +1             O1             1000           2.25714e+06    1.32571e-02    0.00000e+00    

1880           +1             O1             1000           1.85714e+06    3.23746e-01    1.00000e+02    

1881           +1             O1             1000           1.91429e+06    3.23746e-01    9.98000e+01    

1882           +1             O1             1000           1.97143e+06    3.23746e-01    1.00000e+02    

1883           +1             O1             1000           2.02857e+06    3.23746e-01    1.00000e+02    

1884           +1             O1             1000           2.08571e+06    3.23746e-01    9.99000e+01    

1885           +1             O1             1000           2.14286e+06    3.23746e-01    9.99000e+01    

1886           +1             O1             1000           2.20000e+06    3.23746e-01    1.00000e+02    

1887           +1             O1             1000           2.25714e+06    3.23746e-01    1.00000e+02    

1888           +1             O1             1000           2.31429e+06    3.23746e-01    1.00000e+02    

1889           +1             O1             1000           2.37143e+06    3.23746e-01    1.00000e+02    

188            +1             O1             1000           2.31429e+06    1.32571e-02    0.00000e+00    

1890           +1             O1             1000           2.42857e+06    3.23746e-01    1.00000e+02    

1891           +1             O1             1000           2.48571e+06    3.23746e-01    1.00000e+02    

1892           +1             O1             1000           2.54286e+06    3.23746e-01    1.00000e+02    

1893           +1             O1             1000           2.60000e+06    3.23746e-01    1.00000e+02    

1894           +1             O1             1000           2.65714e+06    3.23746e-01    1.00000e+02    

1895           +1             O1             1000           2.71429e+06    3.23746e-01    9.99000e+01    

1896           +1             O1             1000           2.77143e+06    3.23746e-01    1.00000e+02    

1897           +1             O1             1000           2.82857e+06    3.23746e-01    9.99000e+01    

1898           +1             O1             1000           2.88571e+06    3.23746e-01    1.00000e+02    

1899           +1             O1             1000           2.94286e+06    3.23746e-01    9.98000e+01    

189            +1             O1             1000           2.37143e+06    1.32571e-02    0.00000e+00    

18             +1             O1             1000           1.17143e+06    1.00000e-02    0.00000e+00    

1900           +1             O1             1000           3.00000e+06    3.23746e-01    1.00000e+02    

1901           +1             O1             1000           2.00000e+05    3.55648e-01    0.00000e+00    

1902           +1             O1             1000           2.57143e+05    3.55648e-01    0.00000e+00    

1903           +1             O1             1000           3.14286e+05    3.55648e-01    1.00000e-01    

1904           +1             O1             1000           3.71429e+05    3.55648e-01    1.44000e+01    

1905           +1             O1             1000           4.28571e+05    3.55648e-01    4.51000e+01    

1906           +1             O1             1000           4.85714e+05    3.55648e-01    7.10000e+01    

1907           +1             O1             1000           5.42857e+05    3.55648e-01    8.45000e+01    

1908           +1             O1             1000           6.00000e+05    3.55648e-01    9.12000e+01    

1909           +1             O1             1000           6.57143e+05    3.55648e-01    9.60000e+01    

190            +1             O1             1000           2.42857e+06    1.32571e-02    0.00000e+00    

1910           +1             O1             1000           7.14286e+05    3.55648e-01    9.77000e+01    

1911           +1             O1             1000           7.71429e+05    3.55648e-01    9.88000e+01    

1912           +1             O1             1000           8.28571e+05    3.55648e-01    9.90000e+01    

1913           +1             O1             1000           8.85714e+05    3.55648e-01    9.90000e+01    

1914           +1             O1             1000           9.42857e+05    3.55648e-01    9.96000e+01    

1915           +1             O1             1000           1.00000e+06    3.55648e-01    9.97000e+01    

1916           +1             O1             1000           1.05714e+06    3.55648e-01    1.00000e+02    

1917           +1             O1             1000           1.11429e+06    3.55648e-01    9.97000e+01    

1918           +1             O1             1000           1.17143e+06    3.55648e-01    9.99000e+01    

1919           +1             O1             1000           1.22857e+06    3.55648e-01    9.99000e+01    

191            +1             O1             1000           2.48571e+06    1.32571e-02    0.00000e+00    

1920           +1             O1             1000           1.28571e+06    3.55648e-01    9.98000e+01    

1921           +1             O1             1000           1.34286e+06    3.55648e-01    9.99000e+01    

1922           +1             O1             1000           1.40000e+06    3.55648e-01    1.00000e+02    

1923           +1             O1             1000           1.45714e+06    3.55648e-01    9.98000e+01    

1924           +1             O1             1000           1.51429e+06    3.55648e-01    1.00000e+02    

1925           +1             O1             1000           1.57143e+06    3.55648e-01    1.00000e+02    

1926           +1             O1             1000           1.62857e+06    3.55648e-01    9.99000e+01    

1927           +1             O1             1000           1.68571e+06    3.55648e-01    1.00000e+02    

1928           +1             O1             1000           1.74286e+06    3.55648e-01    1.00000e+02    

1929           +1             O1             1000           1.80000e+06    3.55648e-01    1.00000e+02    

192            +1             O1             1000           2.54286e+06    1.32571e-02    0.00000e+00    

1930           +1             O1             1000           1.85714e+06    3.55648e-01    1.00000e+02    

1931           +1             O1             1000           1.91429e+06    3.55648e-01    1.00000e+02    

1932           +1             O1             1000           1.97143e+06    3.55648e-01    9.99000e+01    

1933           +1             O1             1000           2.02857e+06    3.55648e-01    1.00000e+02    

1934           +1             O1             1000           2.08571e+06    3.55648e-01    1.00000e+02    

1935           +1             O1             1000           2.14286e+06    3.55648e-01    1.00000e+02    

1936           +1             O1             1000           2.20000e+06    3.55648e-01    1.00000e+02    

1937           +1             O1             1000           2.25714e+06    3.55648e-01    1.00000e+02    

1938           +1             O1             1000           2.31429e+06    3.55648e-01    1.00000e+02    

1939           +1             O1             1000           2.37143e+06    3.55648e-01    1.00000e+02    

193            +1             O1             1000           2.60000e+06    1.32571e-02    0.00000e+00    

1940           +1             O1             1000           2.42857e+06    3.55648e-01    1.00000e+02    

1941           +1             O1             1000           2.48571e+06    3.55648e-01    1.00000e+02    

1942           +1             O1             1000           2.54286e+06    3.55648e-01    1.00000e+02    

1943           +1             O1             1000           2.60000e+06    3.55648e-01    1.00000e+02    

1944           +1             O1             1000           2.65714e+06    3.55648e-01    1.00000e+02    

1945           +1             O1             1000           2.71429e+06    3.55648e-01    1.00000e+02    

1946           +1             O1             1000           2.77143e+06    3.55648e-01    1.00000e+02    

1947           +1             O1             1000           2.82857e+06    3.55648e-01    1.00000e+02    

1948           +1             O1             1000           2.88571e+06    3.55648e-01    1.00000e+02    

1949           +1             O1             1000           2.94286e+06    3.55648e-01    1.00000e+02    

194            +1             O1             1000           2.65714e+06    1.32571e-02    0.00000e+00    

1950           +1             O1             1000           3.00000e+06    3.55648e-01    1.00000e+02    

1951           +1             O1             1000           2.00000e+05    3.90694e-01    0.00000e+00    

1952           +1             O1             1000           2.57143e+05    3.90694e-01    0.00000e+00    

1953           +1             O1             1000           3.14286e+05    3.90694e-01    2.00000e-01    

1954           +1             O1             1000           3.71429e+05    3.90694e-01    1.95000e+01    

1955           +1             O1             1000           4.28571e+05    3.90694e-01    5.37000e+01    

1956           +1             O1             1000           4.85714e+05    3.90694e-01    7.72000e+01    

1957           +1             O1             1000           5.42857e+05    3.90694e-01    8.91000e+01    

1958           +1             O1             1000           6.00000e+05    3.90694e-01    9.55000e+01    

1959           +1             O1             1000           6.57143e+05    3.90694e-01    9.65000e+01    

195            +1             O1             1000           2.71429e+06    1.32571e-02    0.00000e+00    

1960           +1             O1             1000           7.14286e+05    3.90694e-01    9.79000e+01    

1961           +1             O1             1000           7.71429e+05    3.90694e-01    9.91000e+01    

1962           +1             O1             1000           8.28571e+05    3.90694e-01    9.96000e+01    

1963           +1             O1             1000           8.85714e+05    3.90694e-01    9.96000e+01    

1964           +1             O1             1000           9.42857e+05    3.90694e-01    9.94000e+01    

1965           +1             O1             1000           1.00000e+06    3.90694e-01    1.00000e+02    

1966           +1             O1             1000           1.05714e+06    3.90694e-01    9.99000e+01    

1967           +1             O1             1000           1.11429e+06    3.90694e-01    9.98000e+01    

1968           +1             O1             1000           1.17143e+06    3.90694e-01    9.98000e+01    

1969           +1             O1             1000           1.22857e+06    3.90694e-01    1.00000e+02    

196            +1             O1             1000           2.77143e+06    1.32571e-02    0.00000e+00    

1970           +1             O1             1000           1.28571e+06    3.90694e-01    9.98000e+01    

1971           +1             O1             1000           1.34286e+06    3.90694e-01    9.97000e+01    

1972           +1             O1             1000           1.40000e+06    3.90694e-01    9.99000e+01    

1973           +1             O1             1000           1.45714e+06    3.90694e-01    1.00000e+02    

1974           +1             O1             1000           1.51429e+06    3.90694e-01    1.00000e+02    

1975           +1             O1             1000           1.57143e+06    3.90694e-01    9.98000e+01    

1976           +1             O1             1000           1.62857e+06    3.90694e-01    1.00000e+02    

1977           +1             O1             1000           1.68571e+06    3.90694e-01    1.00000e+02    

1978           +1             O1             1000           1.74286e+06    3.90694e-01    1.00000e+02    

1979           +1             O1             1000           1.80000e+06    3.90694e-01    1.00000e+02    

197            +1             O1             1000           2.82857e+06    1.32571e-02    0.00000e+00    

1980           +1             O1             1000           1.85714e+06    3.90694e-01    1.00000e+02    

1981           +1             O1             1000           1.91429e+06    3.90694e-01    1.00000e+02    

1982           +1             O1             1000           1.97143e+06    3.90694e-01    1.00000e+02    

1983           +1             O1             1000           2.02857e+06    3.90694e-01    1.00000e+02    

1984           +1             O1             1000           2.08571e+06    3.90694e-01    1.00000e+02    

1985           +1             O1             1000           2.14286e+06    3.90694e-01    1.00000e+02    

1986           +1             O1             1000           2.20000e+06    3.90694e-01    9.99000e+01    

1987           +1             O1             1000           2.25714e+06    3.90694e-01    1.00000e+02    

1988           +1             O1             1000           2.31429e+06    3.90694e-01    1.00000e+02    

1989           +1             O1             1000           2.37143e+06    3.90694e-01    1.00000e+02    

198            +1             O1             1000           2.88571e+06    1.32571e-02    0.00000e+00    

1990           +1             O1             1000           2.42857e+06    3.90694e-01    9.99000e+01    

1991           +1             O1             1000           2.48571e+06    3.90694e-01    9.99000e+01    

1992           +1             O1             1000           2.54286e+06    3.90694e-01    1.00000e+02    

1993           +1             O1             1000           2.60000e+06    3.90694e-01    9.99000e+01    

1994           +1             O1             1000           2.65714e+06    3.90694e-01    1.00000e+02    

1995           +1             O1             1000           2.71429e+06    3.90694e-01    1.00000e+02    

1996           +1             O1             1000           2.77143e+06    3.90694e-01    1.00000e+02    

1997           +1             O1             1000           2.82857e+06    3.90694e-01    1.00000e+02    

1998           +1             O1             1000           2.88571e+06    3.90694e-01    1.00000e+02    

1999           +1             O1             1000           2.94286e+06    3.90694e-01    1.00000e+02    

199            +1             O1             1000           2.94286e+06    1.32571e-02    0.00000e+00    

19             +1             O1             1000           1.22857e+06    1.00000e-02    0.00000e+00    

1              +1             O1             1000           2.00000e+05    1.00000e-02    0.00000e+00    

2000           +1             O1             1000           3.00000e+06    3.90694e-01    1.00000e+02    

2001           +1             O1             1000           2.00000e+05    4.29193e-01    0.00000e+00    

2002           +1             O1             1000           2.57143e+05    4.29193e-01    0.00000e+00    

2003           +1             O1             1000           3.14286e+05    4.29193e-01    1.10000e+00    

2004           +1             O1             1000           3.71429e+05    4.29193e-01    2.61000e+01    

2005           +1             O1             1000           4.28571e+05    4.29193e-01    6.23000e+01    

2006           +1             O1             1000           4.85714e+05    4.29193e-01    8.16000e+01    

2007           +1             O1             1000           5.42857e+05    4.29193e-01    9.19000e+01    

2008           +1             O1             1000           6.00000e+05    4.29193e-01    9.62000e+01    

2009           +1             O1             1000           6.57143e+05    4.29193e-01    9.81000e+01    

200            +1             O1             1000           3.00000e+06    1.32571e-02    0.00000e+00    

2010           +1             O1             1000           7.14286e+05    4.29193e-01    9.91000e+01    

2011           +1             O1             1000           7.71429e+05    4.29193e-01    9.93000e+01    

2012           +1             O1             1000           8.28571e+05    4.29193e-01    9.95000e+01    

2013           +1             O1             1000           8.85714e+05    4.29193e-01    9.94000e+01    

2014           +1             O1             1000           9.42857e+05    4.29193e-01    9.95000e+01    

2015           +1             O1             1000           1.00000e+06    4.29193e-01    9.97000e+01    

2016           +1             O1             1000           1.05714e+06    4.29193e-01    1.00000e+02    

2017           +1             O1             1000           1.11429e+06    4.29193e-01    1.00000e+02    

2018           +1             O1             1000           1.17143e+06    4.29193e-01    1.00000e+02    

2019           +1             O1             1000           1.22857e+06    4.29193e-01    9.99000e+01    

201            +1             O1             1000           2.00000e+05    1.45635e-02    0.00000e+00    

2020           +1             O1             1000           1.28571e+06    4.29193e-01    9.99000e+01    

2021           +1             O1             1000           1.34286e+06    4.29193e-01    9.99000e+01    

2022           +1             O1             1000           1.40000e+06    4.29193e-01    9.99000e+01    

2023           +1             O1             1000           1.45714e+06    4.29193e-01    9.98000e+01    

2024           +1             O1             1000           1.51429e+06    4.29193e-01    1.00000e+02    

2025           +1             O1             1000           1.57143e+06    4.29193e-01    9.99000e+01    

2026           +1             O1             1000           1.62857e+06    4.29193e-01    1.00000e+02    

2027           +1             O1             1000           1.68571e+06    4.29193e-01    1.00000e+02    

2028           +1             O1             1000           1.74286e+06    4.29193e-01    1.00000e+02    

2029           +1             O1             1000           1.80000e+06    4.29193e-01    1.00000e+02    

202            +1             O1             1000           2.57143e+05    1.45635e-02    0.00000e+00    

2030           +1             O1             1000           1.85714e+06    4.29193e-01    1.00000e+02    

2031           +1             O1             1000           1.91429e+06    4.29193e-01    1.00000e+02    

2032           +1             O1             1000           1.97143e+06    4.29193e-01    1.00000e+02    

2033           +1             O1             1000           2.02857e+06    4.29193e-01    1.00000e+02    

2034           +1             O1             1000           2.08571e+06    4.29193e-01    1.00000e+02    

2035           +1             O1             1000           2.14286e+06    4.29193e-01    1.00000e+02    

2036           +1             O1             1000           2.20000e+06    4.29193e-01    1.00000e+02    

2037           +1             O1             1000           2.25714e+06    4.29193e-01    1.00000e+02    

2038           +1             O1             1000           2.31429e+06    4.29193e-01    1.00000e+02    

2039           +1             O1             1000           2.37143e+06    4.29193e-01    1.00000e+02    

203            +1             O1             1000           3.14286e+05    1.45635e-02    0.00000e+00    

2040           +1             O1             1000           2.42857e+06    4.29193e-01    1.00000e+02    

2041           +1             O1             1000           2.48571e+06    4.29193e-01    1.00000e+02    

2042           +1             O1             1000           2.54286e+06    4.29193e-01    1.00000e+02    

2043           +1             O1             1000           2.60000e+06    4.29193e-01    1.00000e+02    

2044           +1             O1             1000           2.65714e+06    4.29193e-01    1.00000e+02    

2045           +1             O1             1000           2.71429e+06    4.29193e-01    1.00000e+02    

2046           +1             O1             1000           2.77143e+06    4.29193e-01    1.00000e+02    

2047           +1             O1             1000           2.82857e+06    4.29193e-01    1.00000e+02    

2048           +1             O1             1000           2.88571e+06    4.29193e-01    1.00000e+02    

2049           +1             O1             1000           2.94286e+06    4.29193e-01    1.00000e+02    

204            +1             O1             1000           3.71429e+05    1.45635e-02    0.00000e+00    

2050           +1             O1             1000           3.00000e+06    4.29193e-01    1.00000e+02    

2051           +1             O1             1000           2.00000e+05    4.71487e-01    0.00000e+00    

2052           +1             O1             1000           2.57143e+05    4.71487e-01    0.00000e+00    

2053           +1             O1             1000           3.14286e+05    4.71487e-01    2.80000e+00    

2054           +1             O1             1000           3.71429e+05    4.71487e-01    3.44000e+01    

2055           +1             O1             1000           4.28571e+05    4.71487e-01    7.04000e+01    

2056           +1             O1             1000           4.85714e+05    4.71487e-01    8.62000e+01    

2057           +1             O1             1000           5.42857e+05    4.71487e-01    9.29000e+01    

2058           +1             O1             1000           6.00000e+05    4.71487e-01    9.75000e+01    

2059           +1             O1             1000           6.57143e+05    4.71487e-01    9.85000e+01    

205            +1             O1             1000           4.28571e+05    1.45635e-02    0.00000e+00    

2060           +1             O1             1000           7.14286e+05    4.71487e-01    9.96000e+01    

2061           +1             O1             1000           7.71429e+05    4.71487e-01    9.95000e+01    

2062           +1             O1             1000           8.28571e+05    4.71487e-01    9.97000e+01    

2063           +1             O1             1000           8.85714e+05    4.71487e-01    9.99000e+01    

2064           +1             O1             1000           9.42857e+05    4.71487e-01    9.98000e+01    

2065           +1             O1             1000           1.00000e+06    4.71487e-01    9.97000e+01    

2066           +1             O1             1000           1.05714e+06    4.71487e-01    9.99000e+01    

2067           +1             O1             1000           1.11429e+06    4.71487e-01    9.99000e+01    

2068           +1             O1             1000           1.17143e+06    4.71487e-01    9.96000e+01    

2069           +1             O1             1000           1.22857e+06    4.71487e-01    1.00000e+02    

206            +1             O1             1000           4.85714e+05    1.45635e-02    0.00000e+00    

2070           +1             O1             1000           1.28571e+06    4.71487e-01    9.99000e+01    

2071           +1             O1             1000           1.34286e+06    4.71487e-01    1.00000e+02    

2072           +1             O1             1000           1.40000e+06    4.71487e-01    9.99000e+01    

2073           +1             O1             1000           1.45714e+06    4.71487e-01    1.00000e+02    

2074           +1             O1             1000           1.51429e+06    4.71487e-01    1.00000e+02    

2075           +1             O1             1000           1.57143e+06    4.71487e-01    1.00000e+02    

2076           +1             O1             1000           1.62857e+06    4.71487e-01    9.99000e+01    

2077           +1             O1             1000           1.68571e+06    4.71487e-01    1.00000e+02    

2078           +1             O1             1000           1.74286e+06    4.71487e-01    1.00000e+02    

2079           +1             O1             1000           1.80000e+06    4.71487e-01    1.00000e+02    

207            +1             O1             1000           5.42857e+05    1.45635e-02    0.00000e+00    

2080           +1             O1             1000           1.85714e+06    4.71487e-01    1.00000e+02    

2081           +1             O1             1000           1.91429e+06    4.71487e-01    9.99000e+01    

2082           +1             O1             1000           1.97143e+06    4.71487e-01    1.00000e+02    

2083           +1             O1             1000           2.02857e+06    4.71487e-01    1.00000e+02    

2084           +1             O1             1000           2.08571e+06    4.71487e-01    1.00000e+02    

2085           +1             O1             1000           2.14286e+06    4.71487e-01    1.00000e+02    

2086           +1             O1             1000           2.20000e+06    4.71487e-01    1.00000e+02    

2087           +1             O1             1000           2.25714e+06    4.71487e-01    1.00000e+02    

2088           +1             O1             1000           2.31429e+06    4.71487e-01    1.00000e+02    

2089           +1             O1             1000           2.37143e+06    4.71487e-01    1.00000e+02    

208            +1             O1             1000           6.00000e+05    1.45635e-02    0.00000e+00    

2090           +1             O1             1000           2.42857e+06    4.71487e-01    1.00000e+02    

2091           +1             O1             1000           2.48571e+06    4.71487e-01    1.00000e+02    

2092           +1             O1             1000           2.54286e+06    4.71487e-01    1.00000e+02    

2093           +1             O1             1000           2.60000e+06    4.71487e-01    1.00000e+02    

2094           +1             O1             1000           2.65714e+06    4.71487e-01    1.00000e+02    

2095           +1             O1             1000           2.71429e+06    4.71487e-01    1.00000e+02    

2096           +1             O1             1000           2.77143e+06    4.71487e-01    1.00000e+02    

2097           +1             O1             1000           2.82857e+06    4.71487e-01    1.00000e+02    

2098           +1             O1             1000           2.88571e+06    4.71487e-01    1.00000e+02    

2099           +1             O1             1000           2.94286e+06    4.71487e-01    1.00000e+02    

209            +1             O1             1000           6.57143e+05    1.45635e-02    0.00000e+00    

20             +1             O1             1000           1.28571e+06    1.00000e-02    0.00000e+00    

2100           +1             O1             1000           3.00000e+06    4.71487e-01    1.00000e+02    

2101           +1             O1             1000           2.00000e+05    5.17947e-01    0.00000e+00    

2102           +1             O1             1000           2.57143e+05    5.17947e-01    0.00000e+00    

2103           +1             O1             1000           3.14286e+05    5.17947e-01    3.70000e+00    

2104           +1             O1             1000           3.71429e+05    5.17947e-01    4.10000e+01    

2105           +1             O1             1000           4.28571e+05    5.17947e-01    7.52000e+01    

2106           +1             O1             1000           4.85714e+05    5.17947e-01    9.11000e+01    

2107           +1             O1             1000           5.42857e+05    5.17947e-01    9.62000e+01    

2108           +1             O1             1000           6.00000e+05    5.17947e-01    9.84000e+01    

2109           +1             O1             1000           6.57143e+05    5.17947e-01    9.88000e+01    

210            +1             O1             1000           7.14286e+05    1.45635e-02    0.00000e+00    

2110           +1             O1             1000           7.14286e+05    5.17947e-01    9.89000e+01    

2111           +1             O1             1000           7.71429e+05    5.17947e-01    9.97000e+01    

2112           +1             O1             1000           8.28571e+05    5.17947e-01    9.98000e+01    

2113           +1             O1             1000           8.85714e+05    5.17947e-01    9.99000e+01    

2114           +1             O1             1000           9.42857e+05    5.17947e-01    9.99000e+01    

2115           +1             O1             1000           1.00000e+06    5.17947e-01    9.98000e+01    

2116           +1             O1             1000           1.05714e+06    5.17947e-01    1.00000e+02    

2117           +1             O1             1000           1.11429e+06    5.17947e-01    9.99000e+01    

2118           +1             O1             1000           1.17143e+06    5.17947e-01    9.99000e+01    

2119           +1             O1             1000           1.22857e+06    5.17947e-01    1.00000e+02    

211            +1             O1             1000           7.71429e+05    1.45635e-02    0.00000e+00    

2120           +1             O1             1000           1.28571e+06    5.17947e-01    1.00000e+02    

2121           +1             O1             1000           1.34286e+06    5.17947e-01    9.99000e+01    

2122           +1             O1             1000           1.40000e+06    5.17947e-01    1.00000e+02    

2123           +1             O1             1000           1.45714e+06    5.17947e-01    1.00000e+02    

2124           +1             O1             1000           1.51429e+06    5.17947e-01    1.00000e+02    

2125           +1             O1             1000           1.57143e+06    5.17947e-01    9.99000e+01    

2126           +1             O1             1000           1.62857e+06    5.17947e-01    1.00000e+02    

2127           +1             O1             1000           1.68571e+06    5.17947e-01    9.99000e+01    

2128           +1             O1             1000           1.74286e+06    5.17947e-01    1.00000e+02    

2129           +1             O1             1000           1.80000e+06    5.17947e-01    1.00000e+02    

212            +1             O1             1000           8.28571e+05    1.45635e-02    0.00000e+00    

2130           +1             O1             1000           1.85714e+06    5.17947e-01    1.00000e+02    

2131           +1             O1             1000           1.91429e+06    5.17947e-01    1.00000e+02    

2132           +1             O1             1000           1.97143e+06    5.17947e-01    1.00000e+02    

2133           +1             O1             1000           2.02857e+06    5.17947e-01    1.00000e+02    

2134           +1             O1             1000           2.08571e+06    5.17947e-01    1.00000e+02    

2135           +1             O1             1000           2.14286e+06    5.17947e-01    1.00000e+02    

2136           +1             O1             1000           2.20000e+06    5.17947e-01    1.00000e+02    

2137           +1             O1             1000           2.25714e+06    5.17947e-01    1.00000e+02    

2138           +1             O1             1000           2.31429e+06    5.17947e-01    1.00000e+02    

2139           +1             O1             1000           2.37143e+06    5.17947e-01    1.00000e+02    

213            +1             O1             1000           8.85714e+05    1.45635e-02    0.00000e+00    

2140           +1             O1             1000           2.42857e+06    5.17947e-01    1.00000e+02    

2141           +1             O1             1000           2.48571e+06    5.17947e-01    1.00000e+02    

2142           +1             O1             1000           2.54286e+06    5.17947e-01    1.00000e+02    

2143           +1             O1             1000           2.60000e+06    5.17947e-01    1.00000e+02    

2144           +1             O1             1000           2.65714e+06    5.17947e-01    1.00000e+02    

2145           +1             O1             1000           2.71429e+06    5.17947e-01    1.00000e+02    

2146           +1             O1             1000           2.77143e+06    5.17947e-01    1.00000e+02    

2147           +1             O1             1000           2.82857e+06    5.17947e-01    1.00000e+02    

2148           +1             O1             1000           2.88571e+06    5.17947e-01    1.00000e+02    

2149           +1             O1             1000           2.94286e+06    5.17947e-01    1.00000e+02    

214            +1             O1             1000           9.42857e+05    1.45635e-02    0.00000e+00    

2150           +1             O1             1000           3.00000e+06    5.17947e-01    1.00000e+02    

2151           +1             O1             1000           2.00000e+05    5.68987e-01    0.00000e+00    

2152           +1             O1             1000           2.57143e+05    5.68987e-01    0.00000e+00    

2153           +1             O1             1000           3.14286e+05    5.68987e-01    6.20000e+00    

2154           +1             O1             1000           3.71429e+05    5.68987e-01    4.71000e+01    

2155           +1             O1             1000           4.28571e+05    5.68987e-01    8.26000e+01    

2156           +1             O1             1000           4.85714e+05    5.68987e-01    9.12000e+01    

2157           +1             O1             1000           5.42857e+05    5.68987e-01    9.60000e+01    

2158           +1             O1             1000           6.00000e+05    5.68987e-01    9.84000e+01    

2159           +1             O1             1000           6.57143e+05    5.68987e-01    9.93000e+01    

215            +1             O1             1000           1.00000e+06    1.45635e-02    0.00000e+00    

2160           +1             O1             1000           7.14286e+05    5.68987e-01    9.93000e+01    

2161           +1             O1             1000           7.71429e+05    5.68987e-01    9.99000e+01    

2162           +1             O1             1000           8.28571e+05    5.68987e-01    1.00000e+02    

2163           +1             O1             1000           8.85714e+05    5.68987e-01    9.97000e+01    

2164           +1             O1             1000           9.42857e+05    5.68987e-01    9.99000e+01    

2165           +1             O1             1000           1.00000e+06    5.68987e-01    9.99000e+01    

2166           +1             O1             1000           1.05714e+06    5.68987e-01    1.00000e+02    

2167           +1             O1             1000           1.11429e+06    5.68987e-01    1.00000e+02    

2168           +1             O1             1000           1.17143e+06    5.68987e-01    1.00000e+02    

2169           +1             O1             1000           1.22857e+06    5.68987e-01    1.00000e+02    

216            +1             O1             1000           1.05714e+06    1.45635e-02    0.00000e+00    

2170           +1             O1             1000           1.28571e+06    5.68987e-01    1.00000e+02    

2171           +1             O1             1000           1.34286e+06    5.68987e-01    1.00000e+02    

2172           +1             O1             1000           1.40000e+06    5.68987e-01    1.00000e+02    

2173           +1             O1             1000           1.45714e+06    5.68987e-01    1.00000e+02    

2174           +1             O1             1000           1.51429e+06    5.68987e-01    9.99000e+01    

2175           +1             O1             1000           1.57143e+06    5.68987e-01    1.00000e+02    

2176           +1             O1             1000           1.62857e+06    5.68987e-01    1.00000e+02    

2177           +1             O1             1000           1.68571e+06    5.68987e-01    1.00000e+02    

2178           +1             O1             1000           1.74286e+06    5.68987e-01    1.00000e+02    

2179           +1             O1             1000           1.80000e+06    5.68987e-01    1.00000e+02    

217            +1             O1             1000           1.11429e+06    1.45635e-02    0.00000e+00    

2180           +1             O1             1000           1.85714e+06    5.68987e-01    1.00000e+02    

2181           +1             O1             1000           1.91429e+06    5.68987e-01    1.00000e+02    

2182           +1             O1             1000           1.97143e+06    5.68987e-01    9.99000e+01    

2183           +1             O1             1000           2.02857e+06    5.68987e-01    1.00000e+02    

2184           +1             O1             1000           2.08571e+06    5.68987e-01    1.00000e+02    

2185           +1             O1             1000           2.14286e+06    5.68987e-01    9.99000e+01    

2186           +1             O1             1000           2.20000e+06    5.68987e-01    1.00000e+02    

2187           +1             O1             1000           2.25714e+06    5.68987e-01    1.00000e+02    

2188           +1             O1             1000           2.31429e+06    5.68987e-01    1.00000e+02    

2189           +1             O1             1000           2.37143e+06    5.68987e-01    1.00000e+02    

218            +1             O1             1000           1.17143e+06    1.45635e-02    0.00000e+00    

2190           +1             O1             1000           2.42857e+06    5.68987e-01    1.00000e+02    

2191           +1             O1             1000           2.48571e+06    5.68987e-01    1.00000e+02    

2192           +1             O1             1000           2.54286e+06    5.68987e-01    1.00000e+02    

2193           +1             O1             1000           2.60000e+06    5.68987e-01    1.00000e+02    

2194           +1             O1             1000           2.65714e+06    5.68987e-01    1.00000e+02    

2195           +1             O1             1000           2.71429e+06    5.68987e-01    1.00000e+02    

2196           +1             O1             1000           2.77143e+06    5.68987e-01    1.00000e+02    

2197           +1             O1             1000           2.82857e+06    5.68987e-01    1.00000e+02    

2198           +1             O1             1000           2.88571e+06    5.68987e-01    1.00000e+02    

2199           +1             O1             1000           2.94286e+06    5.68987e-01    1.00000e+02    

219            +1             O1             1000           1.22857e+06    1.45635e-02    0.00000e+00    

21             +1             O1             1000           1.34286e+06    1.00000e-02    0.00000e+00    

2200           +1             O1             1000           3.00000e+06    5.68987e-01    1.00000e+02    

2201           +1             O1             1000           2.00000e+05    6.25055e-01    0.00000e+00    

2202           +1             O1             1000           2.57143e+05    6.25055e-01    0.00000e+00    

2203           +1             O1             1000           3.14286e+05    6.25055e-01    8.20000e+00    

2204           +1             O1             1000           3.71429e+05    6.25055e-01    5.69000e+01    

2205           +1             O1             1000           4.28571e+05    6.25055e-01    8.50000e+01    

2206           +1             O1             1000           4.85714e+05    6.25055e-01    9.51000e+01    

2207           +1             O1             1000           5.42857e+05    6.25055e-01    9.76000e+01    

2208           +1             O1             1000           6.00000e+05    6.25055e-01    9.93000e+01    

2209           +1             O1             1000           6.57143e+05    6.25055e-01    9.98000e+01    

220            +1             O1             1000           1.28571e+06    1.45635e-02    0.00000e+00    

2210           +1             O1             1000           7.14286e+05    6.25055e-01    9.94000e+01    

2211           +1             O1             1000           7.71429e+05    6.25055e-01    9.99000e+01    

2212           +1             O1             1000           8.28571e+05    6.25055e-01    1.00000e+02    

2213           +1             O1             1000           8.85714e+05    6.25055e-01    1.00000e+02    

2214           +1             O1             1000           9.42857e+05    6.25055e-01    1.00000e+02    

2215           +1             O1             1000           1.00000e+06    6.25055e-01    1.00000e+02    

2216           +1             O1             1000           1.05714e+06    6.25055e-01    1.00000e+02    

2217           +1             O1             1000           1.11429e+06    6.25055e-01    9.99000e+01    

2218           +1             O1             1000           1.17143e+06    6.25055e-01    1.00000e+02    

2219           +1             O1             1000           1.22857e+06    6.25055e-01    1.00000e+02    

221            +1             O1             1000           1.34286e+06    1.45635e-02    0.00000e+00    

2220           +1             O1             1000           1.28571e+06    6.25055e-01    1.00000e+02    

2221           +1             O1             1000           1.34286e+06    6.25055e-01    1.00000e+02    

2222           +1             O1             1000           1.40000e+06    6.25055e-01    1.00000e+02    

2223           +1             O1             1000           1.45714e+06    6.25055e-01    1.00000e+02    

2224           +1             O1             1000           1.51429e+06    6.25055e-01    1.00000e+02    

2225           +1             O1             1000           1.57143e+06    6.25055e-01    1.00000e+02    

2226           +1             O1             1000           1.62857e+06    6.25055e-01    1.00000e+02    

2227           +1             O1             1000           1.68571e+06    6.25055e-01    1.00000e+02    

2228           +1             O1             1000           1.74286e+06    6.25055e-01    1.00000e+02    

2229           +1             O1             1000           1.80000e+06    6.25055e-01    1.00000e+02    

222            +1             O1             1000           1.40000e+06    1.45635e-02    0.00000e+00    

2230           +1             O1             1000           1.85714e+06    6.25055e-01    1.00000e+02    

2231           +1             O1             1000           1.91429e+06    6.25055e-01    1.00000e+02    

2232           +1             O1             1000           1.97143e+06    6.25055e-01    1.00000e+02    

2233           +1             O1             1000           2.02857e+06    6.25055e-01    1.00000e+02    

2234           +1             O1             1000           2.08571e+06    6.25055e-01    1.00000e+02    

2235           +1             O1             1000           2.14286e+06    6.25055e-01    1.00000e+02    

2236           +1             O1             1000           2.20000e+06    6.25055e-01    1.00000e+02    

2237           +1             O1             1000           2.25714e+06    6.25055e-01    1.00000e+02    

2238           +1             O1             1000           2.31429e+06    6.25055e-01    1.00000e+02    

2239           +1             O1             1000           2.37143e+06    6.25055e-01    1.00000e+02    

223            +1             O1             1000           1.45714e+06    1.45635e-02    0.00000e+00    

2240           +1             O1             1000           2.42857e+06    6.25055e-01    1.00000e+02    

2241           +1             O1             1000           2.48571e+06    6.25055e-01    1.00000e+02    

2242           +1             O1             1000           2.54286e+06    6.25055e-01    1.00000e+02    

2243           +1             O1             1000           2.60000e+06    6.25055e-01    1.00000e+02    

2244           +1             O1             1000           2.65714e+06    6.25055e-01    1.00000e+02    

2245           +1             O1             1000           2.71429e+06    6.25055e-01    1.00000e+02    

2246           +1             O1             1000           2.77143e+06    6.25055e-01    1.00000e+02    

2247           +1             O1             1000           2.82857e+06    6.25055e-01    1.00000e+02    

2248           +1             O1             1000           2.88571e+06    6.25055e-01    1.00000e+02    

2249           +1             O1             1000           2.94286e+06    6.25055e-01    1.00000e+02    

224            +1             O1             1000           1.51429e+06    1.45635e-02    0.00000e+00    

2250           +1             O1             1000           3.00000e+06    6.25055e-01    1.00000e+02    

2251           +1             O1             1000           2.00000e+05    6.86649e-01    0.00000e+00    

2252           +1             O1             1000           2.57143e+05    6.86649e-01    0.00000e+00    

2253           +1             O1             1000           3.14286e+05    6.86649e-01    1.06000e+01    

2254           +1             O1             1000           3.71429e+05    6.86649e-01    6.20000e+01    

2255           +1             O1             1000           4.28571e+05    6.86649e-01    8.88000e+01    

2256           +1             O1             1000           4.85714e+05    6.86649e-01    9.65000e+01    

2257           +1             O1             1000           5.42857e+05    6.86649e-01    9.81000e+01    

2258           +1             O1             1000           6.00000e+05    6.86649e-01    9.91000e+01    

2259           +1             O1             1000           6.57143e+05    6.86649e-01    9.97000e+01    

225            +1             O1             1000           1.57143e+06    1.45635e-02    0.00000e+00    

2260           +1             O1             1000           7.14286e+05    6.86649e-01    9.96000e+01    

2261           +1             O1             1000           7.71429e+05    6.86649e-01    9.99000e+01    

2262           +1             O1             1000           8.28571e+05    6.86649e-01    9.99000e+01    

2263           +1             O1             1000           8.85714e+05    6.86649e-01    9.99000e+01    

2264           +1             O1             1000           9.42857e+05    6.86649e-01    1.00000e+02    

2265           +1             O1             1000           1.00000e+06    6.86649e-01    9.99000e+01    

2266           +1             O1             1000           1.05714e+06    6.86649e-01    9.99000e+01    

2267           +1             O1             1000           1.11429e+06    6.86649e-01    1.00000e+02    

2268           +1             O1             1000           1.17143e+06    6.86649e-01    1.00000e+02    

2269           +1             O1             1000           1.22857e+06    6.86649e-01    9.98000e+01    

226            +1             O1             1000           1.62857e+06    1.45635e-02    0.00000e+00    

2270           +1             O1             1000           1.28571e+06    6.86649e-01    1.00000e+02    

2271           +1             O1             1000           1.34286e+06    6.86649e-01    1.00000e+02    

2272           +1             O1             1000           1.40000e+06    6.86649e-01    1.00000e+02    

2273           +1             O1             1000           1.45714e+06    6.86649e-01    1.00000e+02    

2274           +1             O1             1000           1.51429e+06    6.86649e-01    9.99000e+01    

2275           +1             O1             1000           1.57143e+06    6.86649e-01    9.99000e+01    

2276           +1             O1             1000           1.62857e+06    6.86649e-01    1.00000e+02    

2277           +1             O1             1000           1.68571e+06    6.86649e-01    9.99000e+01    

2278           +1             O1             1000           1.74286e+06    6.86649e-01    1.00000e+02    

2279           +1             O1             1000           1.80000e+06    6.86649e-01    1.00000e+02    

227            +1             O1             1000           1.68571e+06    1.45635e-02    0.00000e+00    

2280           +1             O1             1000           1.85714e+06    6.86649e-01    1.00000e+02    

2281           +1             O1             1000           1.91429e+06    6.86649e-01    1.00000e+02    

2282           +1             O1             1000           1.97143e+06    6.86649e-01    9.99000e+01    

2283           +1             O1             1000           2.02857e+06    6.86649e-01    1.00000e+02    

2284           +1             O1             1000           2.08571e+06    6.86649e-01    1.00000e+02    

2285           +1             O1             1000           2.14286e+06    6.86649e-01    1.00000e+02    

2286           +1             O1             1000           2.20000e+06    6.86649e-01    1.00000e+02    

2287           +1             O1             1000           2.25714e+06    6.86649e-01    1.00000e+02    

2288           +1             O1             1000           2.31429e+06    6.86649e-01    1.00000e+02    

2289           +1             O1             1000           2.37143e+06    6.86649e-01    1.00000e+02    

228            +1             O1             1000           1.74286e+06    1.45635e-02    0.00000e+00    

2290           +1             O1             1000           2.42857e+06    6.86649e-01    1.00000e+02    

2291           +1             O1             1000           2.48571e+06    6.86649e-01    1.00000e+02    

2292           +1             O1             1000           2.54286e+06    6.86649e-01    1.00000e+02    

2293           +1             O1             1000           2.60000e+06    6.86649e-01    1.00000e+02    

2294           +1             O1             1000           2.65714e+06    6.86649e-01    1.00000e+02    

2295           +1             O1             1000           2.71429e+06    6.86649e-01    1.00000e+02    

2296           +1             O1             1000           2.77143e+06    6.86649e-01    1.00000e+02    

2297           +1             O1             1000           2.82857e+06    6.86649e-01    1.00000e+02    

2298           +1             O1             1000           2.88571e+06    6.86649e-01    1.00000e+02    

2299           +1             O1             1000           2.94286e+06    6.86649e-01    1.00000e+02    

229            +1             O1             1000           1.80000e+06    1.45635e-02    0.00000e+00    

22             +1             O1             1000           1.40000e+06    1.00000e-02    0.00000e+00    

2300           +1             O1             1000           3.00000e+06    6.86649e-01    1.00000e+02    

2301           +1             O1             1000           2.00000e+05    7.54312e-01    0.00000e+00    

2302           +1             O1             1000           2.57143e+05    7.54312e-01    0.00000e+00    

2303           +1             O1             1000           3.14286e+05    7.54312e-01    1.58000e+01    

2304           +1             O1             1000           3.71429e+05    7.54312e-01    6.87000e+01    

2305           +1             O1             1000           4.28571e+05    7.54312e-01    9.08000e+01    

2306           +1             O1             1000           4.85714e+05    7.54312e-01    9.59000e+01    

2307           +1             O1             1000           5.42857e+05    7.54312e-01    9.83000e+01    

2308           +1             O1             1000           6.00000e+05    7.54312e-01    9.97000e+01    

2309           +1             O1             1000           6.57143e+05    7.54312e-01    9.95000e+01    

230            +1             O1             1000           1.85714e+06    1.45635e-02    0.00000e+00    

2310           +1             O1             1000           7.14286e+05    7.54312e-01    1.00000e+02    

2311           +1             O1             1000           7.71429e+05    7.54312e-01    1.00000e+02    

2312           +1             O1             1000           8.28571e+05    7.54312e-01    9.98000e+01    

2313           +1             O1             1000           8.85714e+05    7.54312e-01    9.99000e+01    

2314           +1             O1             1000           9.42857e+05    7.54312e-01    1.00000e+02    

2315           +1             O1             1000           1.00000e+06    7.54312e-01    9.98000e+01    

2316           +1             O1             1000           1.05714e+06    7.54312e-01    1.00000e+02    

2317           +1             O1             1000           1.11429e+06    7.54312e-01    1.00000e+02    

2318           +1             O1             1000           1.17143e+06    7.54312e-01    1.00000e+02    

2319           +1             O1             1000           1.22857e+06    7.54312e-01    1.00000e+02    

231            +1             O1             1000           1.91429e+06    1.45635e-02    0.00000e+00    

2320           +1             O1             1000           1.28571e+06    7.54312e-01    1.00000e+02    

2321           +1             O1             1000           1.34286e+06    7.54312e-01    1.00000e+02    

2322           +1             O1             1000           1.40000e+06    7.54312e-01    1.00000e+02    

2323           +1             O1             1000           1.45714e+06    7.54312e-01    1.00000e+02    

2324           +1             O1             1000           1.51429e+06    7.54312e-01    1.00000e+02    

2325           +1             O1             1000           1.57143e+06    7.54312e-01    1.00000e+02    

2326           +1             O1             1000           1.62857e+06    7.54312e-01    1.00000e+02    

2327           +1             O1             1000           1.68571e+06    7.54312e-01    1.00000e+02    

2328           +1             O1             1000           1.74286e+06    7.54312e-01    1.00000e+02    

2329           +1             O1             1000           1.80000e+06    7.54312e-01    1.00000e+02    

232            +1             O1             1000           1.97143e+06    1.45635e-02    0.00000e+00    

2330           +1             O1             1000           1.85714e+06    7.54312e-01    1.00000e+02    

2331           +1             O1             1000           1.91429e+06    7.54312e-01    1.00000e+02    

2332           +1             O1             1000           1.97143e+06    7.54312e-01    1.00000e+02    

2333           +1             O1             1000           2.02857e+06    7.54312e-01    1.00000e+02    

2334           +1             O1             1000           2.08571e+06    7.54312e-01    1.00000e+02    

2335           +1             O1             1000           2.14286e+06    7.54312e-01    1.00000e+02    

2336           +1             O1             1000           2.20000e+06    7.54312e-01    1.00000e+02    

2337           +1             O1             1000           2.25714e+06    7.54312e-01    1.00000e+02    

2338           +1             O1             1000           2.31429e+06    7.54312e-01    1.00000e+02    

2339           +1             O1             1000           2.37143e+06    7.54312e-01    1.00000e+02    

233            +1             O1             1000           2.02857e+06    1.45635e-02    0.00000e+00    

2340           +1             O1             1000           2.42857e+06    7.54312e-01    1.00000e+02    

2341           +1             O1             1000           2.48571e+06    7.54312e-01    1.00000e+02    

2342           +1             O1             1000           2.54286e+06    7.54312e-01    1.00000e+02    

2343           +1             O1             1000           2.60000e+06    7.54312e-01    1.00000e+02    

2344           +1             O1             1000           2.65714e+06    7.54312e-01    1.00000e+02    

2345           +1             O1             1000           2.71429e+06    7.54312e-01    1.00000e+02    

2346           +1             O1             1000           2.77143e+06    7.54312e-01    1.00000e+02    

2347           +1             O1             1000           2.82857e+06    7.54312e-01    1.00000e+02    

2348           +1             O1             1000           2.88571e+06    7.54312e-01    9.99000e+01    

2349           +1             O1             1000           2.94286e+06    7.54312e-01    9.99000e+01    

234            +1             O1             1000           2.08571e+06    1.45635e-02    0.00000e+00    

2350           +1             O1             1000           3.00000e+06    7.54312e-01    1.00000e+02    

2351           +1             O1             1000           2.00000e+05    8.28643e-01    0.00000e+00    

2352           +1             O1             1000           2.57143e+05    8.28643e-01    0.00000e+00    

2353           +1             O1             1000           3.14286e+05    8.28643e-01    2.25000e+01    

2354           +1             O1             1000           3.71429e+05    8.28643e-01    7.51000e+01    

2355           +1             O1             1000           4.28571e+05    8.28643e-01    9.27000e+01    

2356           +1             O1             1000           4.85714e+05    8.28643e-01    9.74000e+01    

2357           +1             O1             1000           5.42857e+05    8.28643e-01    9.91000e+01    

2358           +1             O1             1000           6.00000e+05    8.28643e-01    9.96000e+01    

2359           +1             O1             1000           6.57143e+05    8.28643e-01    9.96000e+01    

235            +1             O1             1000           2.14286e+06    1.45635e-02    0.00000e+00    

2360           +1             O1             1000           7.14286e+05    8.28643e-01    9.99000e+01    

2361           +1             O1             1000           7.71429e+05    8.28643e-01    9.99000e+01    

2362           +1             O1             1000           8.28571e+05    8.28643e-01    9.99000e+01    

2363           +1             O1             1000           8.85714e+05    8.28643e-01    1.00000e+02    

2364           +1             O1             1000           9.42857e+05    8.28643e-01    1.00000e+02    

2365           +1             O1             1000           1.00000e+06    8.28643e-01    1.00000e+02    

2366           +1             O1             1000           1.05714e+06    8.28643e-01    1.00000e+02    

2367           +1             O1             1000           1.11429e+06    8.28643e-01    1.00000e+02    

2368           +1             O1             1000           1.17143e+06    8.28643e-01    1.00000e+02    

2369           +1             O1             1000           1.22857e+06    8.28643e-01    1.00000e+02    

236            +1             O1             1000           2.20000e+06    1.45635e-02    0.00000e+00    

2370           +1             O1             1000           1.28571e+06    8.28643e-01    1.00000e+02    

2371           +1             O1             1000           1.34286e+06    8.28643e-01    1.00000e+02    

2372           +1             O1             1000           1.40000e+06    8.28643e-01    1.00000e+02    

2373           +1             O1             1000           1.45714e+06    8.28643e-01    1.00000e+02    

2374           +1             O1             1000           1.51429e+06    8.28643e-01    9.99000e+01    

2375           +1             O1             1000           1.57143e+06    8.28643e-01    1.00000e+02    

2376           +1             O1             1000           1.62857e+06    8.28643e-01    9.99000e+01    

2377           +1             O1             1000           1.68571e+06    8.28643e-01    1.00000e+02    

2378           +1             O1             1000           1.74286e+06    8.28643e-01    1.00000e+02    

2379           +1             O1             1000           1.80000e+06    8.28643e-01    1.00000e+02    

237            +1             O1             1000           2.25714e+06    1.45635e-02    0.00000e+00    

2380           +1             O1             1000           1.85714e+06    8.28643e-01    1.00000e+02    

2381           +1             O1             1000           1.91429e+06    8.28643e-01    1.00000e+02    

2382           +1             O1             1000           1.97143e+06    8.28643e-01    1.00000e+02    

2383           +1             O1             1000           2.02857e+06    8.28643e-01    1.00000e+02    

2384           +1             O1             1000           2.08571e+06    8.28643e-01    1.00000e+02    

2385           +1             O1             1000           2.14286e+06    8.28643e-01    1.00000e+02    

2386           +1             O1             1000           2.20000e+06    8.28643e-01    1.00000e+02    

2387           +1             O1             1000           2.25714e+06    8.28643e-01    1.00000e+02    

2388           +1             O1             1000           2.31429e+06    8.28643e-01    1.00000e+02    

2389           +1             O1             1000           2.37143e+06    8.28643e-01    1.00000e+02    

238            +1             O1             1000           2.31429e+06    1.45635e-02    0.00000e+00    

2390           +1             O1             1000           2.42857e+06    8.28643e-01    1.00000e+02    

2391           +1             O1             1000           2.48571e+06    8.28643e-01    1.00000e+02    

2392           +1             O1             1000           2.54286e+06    8.28643e-01    1.00000e+02    

2393           +1             O1             1000           2.60000e+06    8.28643e-01    1.00000e+02    

2394           +1             O1             1000           2.65714e+06    8.28643e-01    1.00000e+02    

2395           +1             O1             1000           2.71429e+06    8.28643e-01    1.00000e+02    

2396           +1             O1             1000           2.77143e+06    8.28643e-01    1.00000e+02    

2397           +1             O1             1000           2.82857e+06    8.28643e-01    1.00000e+02    

2398           +1             O1             1000           2.88571e+06    8.28643e-01    1.00000e+02    

2399           +1             O1             1000           2.94286e+06    8.28643e-01    1.00000e+02    

239            +1             O1             1000           2.37143e+06    1.45635e-02    0.00000e+00    

23             +1             O1             1000           1.45714e+06    1.00000e-02    0.00000e+00    

2400           +1             O1             1000           3.00000e+06    8.28643e-01    1.00000e+02    

2401           +1             O1             1000           2.00000e+05    9.10298e-01    0.00000e+00    

2402           +1             O1             1000           2.57143e+05    9.10298e-01    0.00000e+00    

2403           +1             O1             1000           3.14286e+05    9.10298e-01    2.54000e+01    

2404           +1             O1             1000           3.71429e+05    9.10298e-01    7.89000e+01    

2405           +1             O1             1000           4.28571e+05    9.10298e-01    9.53000e+01    

2406           +1             O1             1000           4.85714e+05    9.10298e-01    9.85000e+01    

2407           +1             O1             1000           5.42857e+05    9.10298e-01    9.94000e+01    

2408           +1             O1             1000           6.00000e+05    9.10298e-01    9.97000e+01    

2409           +1             O1             1000           6.57143e+05    9.10298e-01    9.98000e+01    

240            +1             O1             1000           2.42857e+06    1.45635e-02    0.00000e+00    

2410           +1             O1             1000           7.14286e+05    9.10298e-01    9.98000e+01    

2411           +1             O1             1000           7.71429e+05    9.10298e-01    9.99000e+01    

2412           +1             O1             1000           8.28571e+05    9.10298e-01    1.00000e+02    

2413           +1             O1             1000           8.85714e+05    9.10298e-01    1.00000e+02    

2414           +1             O1             1000           9.42857e+05    9.10298e-01    1.00000e+02    

2415           +1             O1             1000           1.00000e+06    9.10298e-01    1.00000e+02    

2416           +1             O1             1000           1.05714e+06    9.10298e-01    1.00000e+02    

2417           +1             O1             1000           1.11429e+06    9.10298e-01    1.00000e+02    

2418           +1             O1             1000           1.17143e+06    9.10298e-01    1.00000e+02    

2419           +1             O1             1000           1.22857e+06    9.10298e-01    1.00000e+02    

241            +1             O1             1000           2.48571e+06    1.45635e-02    0.00000e+00    

2420           +1             O1             1000           1.28571e+06    9.10298e-01    1.00000e+02    

2421           +1             O1             1000           1.34286e+06    9.10298e-01    1.00000e+02    

2422           +1             O1             1000           1.40000e+06    9.10298e-01    1.00000e+02    

2423           +1             O1             1000           1.45714e+06    9.10298e-01    1.00000e+02    

2424           +1             O1             1000           1.51429e+06    9.10298e-01    1.00000e+02    

2425           +1             O1             1000           1.57143e+06    9.10298e-01    1.00000e+02    

2426           +1             O1             1000           1.62857e+06    9.10298e-01    1.00000e+02    

2427           +1             O1             1000           1.68571e+06    9.10298e-01    1.00000e+02    

2428           +1             O1             1000           1.74286e+06    9.10298e-01    1.00000e+02    

2429           +1             O1             1000           1.80000e+06    9.10298e-01    1.00000e+02    

242            +1             O1             1000           2.54286e+06    1.45635e-02    0.00000e+00    

2430           +1             O1             1000           1.85714e+06    9.10298e-01    1.00000e+02    

2431           +1             O1             1000           1.91429e+06    9.10298e-01    1.00000e+02    

2432           +1             O1             1000           1.97143e+06    9.10298e-01    1.00000e+02    

2433           +1             O1             1000           2.02857e+06    9.10298e-01    1.00000e+02    

2434           +1             O1             1000           2.08571e+06    9.10298e-01    1.00000e+02    

2435           +1             O1             1000           2.14286e+06    9.10298e-01    1.00000e+02    

2436           +1             O1             1000           2.20000e+06    9.10298e-01    1.00000e+02    

2437           +1             O1             1000           2.25714e+06    9.10298e-01    1.00000e+02    

2438           +1             O1             1000           2.31429e+06    9.10298e-01    1.00000e+02    

2439           +1             O1             1000           2.37143e+06    9.10298e-01    1.00000e+02    

243            +1             O1             1000           2.60000e+06    1.45635e-02    0.00000e+00    

2440           +1             O1             1000           2.42857e+06    9.10298e-01    1.00000e+02    

2441           +1             O1             1000           2.48571e+06    9.10298e-01    1.00000e+02    

2442           +1             O1             1000           2.54286e+06    9.10298e-01    1.00000e+02    

2443           +1             O1             1000           2.60000e+06    9.10298e-01    1.00000e+02    

2444           +1             O1             1000           2.65714e+06    9.10298e-01    1.00000e+02    

2445           +1             O1             1000           2.71429e+06    9.10298e-01    1.00000e+02    

2446           +1             O1             1000           2.77143e+06    9.10298e-01    1.00000e+02    

2447           +1             O1             1000           2.82857e+06    9.10298e-01    1.00000e+02    

2448           +1             O1             1000           2.88571e+06    9.10298e-01    1.00000e+02    

2449           +1             O1             1000           2.94286e+06    9.10298e-01    1.00000e+02    

244            +1             O1             1000           2.65714e+06    1.45635e-02    0.00000e+00    

2450           +1             O1             1000           3.00000e+06    9.10298e-01    1.00000e+02    

2451           +1             O1             1000           2.00000e+05    1.00000e+00    0.00000e+00    

2452           +1             O1             1000           2.57143e+05    1.00000e+00    0.00000e+00    

2453           +1             O1             1000           3.14286e+05    1.00000e+00    3.46000e+01    

2454           +1             O1             1000           3.71429e+05    1.00000e+00    8.18000e+01    

2455           +1             O1             1000           4.28571e+05    1.00000e+00    9.66000e+01    

2456           +1             O1             1000           4.85714e+05    1.00000e+00    9.90000e+01    

2457           +1             O1             1000           5.42857e+05    1.00000e+00    9.93000e+01    

2458           +1             O1             1000           6.00000e+05    1.00000e+00    9.99000e+01    

2459           +1             O1             1000           6.57143e+05    1.00000e+00    9.98000e+01    

245            +1             O1             1000           2.71429e+06    1.45635e-02    0.00000e+00    

2460           +1             O1             1000           7.14286e+05    1.00000e+00    9.99000e+01    

2461           +1             O1             1000           7.71429e+05    1.00000e+00    1.00000e+02    

2462           +1             O1             1000           8.28571e+05    1.00000e+00    1.00000e+02    

2463           +1             O1             1000           8.85714e+05    1.00000e+00    1.00000e+02    

2464           +1             O1             1000           9.42857e+05    1.00000e+00    1.00000e+02    

2465           +1             O1             1000           1.00000e+06    1.00000e+00    1.00000e+02    

2466           +1             O1             1000           1.05714e+06    1.00000e+00    1.00000e+02    

2467           +1             O1             1000           1.11429e+06    1.00000e+00    1.00000e+02    

2468           +1             O1             1000           1.17143e+06    1.00000e+00    1.00000e+02    

2469           +1             O1             1000           1.22857e+06    1.00000e+00    9.99000e+01    

246            +1             O1             1000           2.77143e+06    1.45635e-02    0.00000e+00    

2470           +1             O1             1000           1.28571e+06    1.00000e+00    1.00000e+02    

2471           +1             O1             1000           1.34286e+06    1.00000e+00    1.00000e+02    

2472           +1             O1             1000           1.40000e+06    1.00000e+00    1.00000e+02    

2473           +1             O1             1000           1.45714e+06    1.00000e+00    1.00000e+02    

2474           +1             O1             1000           1.51429e+06    1.00000e+00    1.00000e+02    

2475           +1             O1             1000           1.57143e+06    1.00000e+00    1.00000e+02    

2476           +1             O1             1000           1.62857e+06    1.00000e+00    1.00000e+02    

2477           +1             O1             1000           1.68571e+06    1.00000e+00    1.00000e+02    

2478           +1             O1             1000           1.74286e+06    1.00000e+00    9.99000e+01    

2479           +1             O1             1000           1.80000e+06    1.00000e+00    1.00000e+02    

247            +1             O1             1000           2.82857e+06    1.45635e-02    0.00000e+00    

2480           +1             O1             1000           1.85714e+06    1.00000e+00    1.00000e+02    

2481           +1             O1             1000           1.91429e+06    1.00000e+00    1.00000e+02    

2482           +1             O1             1000           1.97143e+06    1.00000e+00    1.00000e+02    

2483           +1             O1             1000           2.02857e+06    1.00000e+00    1.00000e+02    

2484           +1             O1             1000           2.08571e+06    1.00000e+00    1.00000e+02    

2485           +1             O1             1000           2.14286e+06    1.00000e+00    1.00000e+02    

2486           +1             O1             1000           2.20000e+06    1.00000e+00    1.00000e+02    

2487           +1             O1             1000           2.25714e+06    1.00000e+00    1.00000e+02    

2488           +1             O1             1000           2.31429e+06    1.00000e+00    1.00000e+02    

2489           +1             O1             1000           2.37143e+06    1.00000e+00    1.00000e+02    

248            +1             O1             1000           2.88571e+06    1.45635e-02    0.00000e+00    

2490           +1             O1             1000           2.42857e+06    1.00000e+00    1.00000e+02    

2491           +1             O1             1000           2.48571e+06    1.00000e+00    1.00000e+02    

2492           +1             O1             1000           2.54286e+06    1.00000e+00    1.00000e+02    

2493           +1             O1             1000           2.60000e+06    1.00000e+00    1.00000e+02    

2494           +1             O1             1000           2.65714e+06    1.00000e+00    1.00000e+02    

2495           +1             O1             1000           2.71429e+06    1.00000e+00    9.99000e+01    

2496           +1             O1             1000           2.77143e+06    1.00000e+00    1.00000e+02    

2497           +1             O1             1000           2.82857e+06    1.00000e+00    1.00000e+02    

2498           +1             O1             1000           2.88571e+06    1.00000e+00    1.00000e+02    

2499           +1             O1             1000           2.94286e+06    1.00000e+00    1.00000e+02    

249            +1             O1             1000           2.94286e+06    1.45635e-02    0.00000e+00    

24             +1             O1             1000           1.51429e+06    1.00000e-02    0.00000e+00    

2500           +1             O1             1000           3.00000e+06    1.00000e+00    1.00000e+02    

2501           +1             O4             1000           2.00000e+05    1.00000e-02    0.00000e+00    

2502           +1             O4             1000           2.57143e+05    1.00000e-02    0.00000e+00    

2503           +1             O4             1000           3.14286e+05    1.00000e-02    0.00000e+00    

2504           +1             O4             1000           3.71429e+05    1.00000e-02    0.00000e+00    

2505           +1             O4             1000           4.28571e+05    1.00000e-02    0.00000e+00    

2506           +1             O4             1000           4.85714e+05    1.00000e-02    0.00000e+00    

2507           +1             O4             1000           5.42857e+05    1.00000e-02    0.00000e+00    

2508           +1             O4             1000           6.00000e+05    1.00000e-02    0.00000e+00    

2509           +1             O4             1000           6.57143e+05    1.00000e-02    0.00000e+00    

250            +1             O1             1000           3.00000e+06    1.45635e-02    0.00000e+00    

2510           +1             O4             1000           7.14286e+05    1.00000e-02    0.00000e+00    

2511           +1             O4             1000           7.71429e+05    1.00000e-02    0.00000e+00    

2512           +1             O4             1000           8.28571e+05    1.00000e-02    0.00000e+00    

2513           +1             O4             1000           8.85714e+05    1.00000e-02    0.00000e+00    

2514           +1             O4             1000           9.42857e+05    1.00000e-02    0.00000e+00    

2515           +1             O4             1000           1.00000e+06    1.00000e-02    0.00000e+00    

2516           +1             O4             1000           1.05714e+06    1.00000e-02    0.00000e+00    

2517           +1             O4             1000           1.11429e+06    1.00000e-02    0.00000e+00    

2518           +1             O4             1000           1.17143e+06    1.00000e-02    0.00000e+00    

2519           +1             O4             1000           1.22857e+06    1.00000e-02    0.00000e+00    

251            +1             O1             1000           2.00000e+05    1.59986e-02    0.00000e+00    

2520           +1             O4             1000           1.28571e+06    1.00000e-02    0.00000e+00    

2521           +1             O4             1000           1.34286e+06    1.00000e-02    0.00000e+00    

2522           +1             O4             1000           1.40000e+06    1.00000e-02    0.00000e+00    

2523           +1             O4             1000           1.45714e+06    1.00000e-02    0.00000e+00    

2524           +1             O4             1000           1.51429e+06    1.00000e-02    0.00000e+00    

2525           +1             O4             1000           1.57143e+06    1.00000e-02    0.00000e+00    

2526           +1             O4             1000           1.62857e+06    1.00000e-02    0.00000e+00    

2527           +1             O4             1000           1.68571e+06    1.00000e-02    0.00000e+00    

2528           +1             O4             1000           1.74286e+06    1.00000e-02    0.00000e+00    

2529           +1             O4             1000           1.80000e+06    1.00000e-02    0.00000e+00    

252            +1             O1             1000           2.57143e+05    1.59986e-02    0.00000e+00    

2530           +1             O4             1000           1.85714e+06    1.00000e-02    0.00000e+00    

2531           +1             O4             1000           1.91429e+06    1.00000e-02    0.00000e+00    

2532           +1             O4             1000           1.97143e+06    1.00000e-02    0.00000e+00    

2533           +1             O4             1000           2.02857e+06    1.00000e-02    0.00000e+00    

2534           +1             O4             1000           2.08571e+06    1.00000e-02    0.00000e+00    

2535           +1             O4             1000           2.14286e+06    1.00000e-02    0.00000e+00    

2536           +1             O4             1000           2.20000e+06    1.00000e-02    0.00000e+00    

2537           +1             O4             1000           2.25714e+06    1.00000e-02    0.00000e+00    

2538           +1             O4             1000           2.31429e+06    1.00000e-02    0.00000e+00    

2539           +1             O4             1000           2.37143e+06    1.00000e-02    0.00000e+00    

253            +1             O1             1000           3.14286e+05    1.59986e-02    0.00000e+00    

2540           +1             O4             1000           2.42857e+06    1.00000e-02    0.00000e+00    

2541           +1             O4             1000           2.48571e+06    1.00000e-02    0.00000e+00    

2542           +1             O4             1000           2.54286e+06    1.00000e-02    0.00000e+00    

2543           +1             O4             1000           2.60000e+06    1.00000e-02    0.00000e+00    

2544           +1             O4             1000           2.65714e+06    1.00000e-02    0.00000e+00    

2545           +1             O4             1000           2.71429e+06    1.00000e-02    0.00000e+00    

2546           +1             O4             1000           2.77143e+06    1.00000e-02    0.00000e+00    

2547           +1             O4             1000           2.82857e+06    1.00000e-02    0.00000e+00    

2548           +1             O4             1000           2.88571e+06    1.00000e-02    0.00000e+00    

2549           +1             O4             1000           2.94286e+06    1.00000e-02    0.00000e+00    

254            +1             O1             1000           3.71429e+05    1.59986e-02    0.00000e+00    

2550           +1             O4             1000           3.00000e+06    1.00000e-02    0.00000e+00    

2551           +1             O4             1000           2.00000e+05    1.09854e-02    0.00000e+00    

2552           +1             O4             1000           2.57143e+05    1.09854e-02    0.00000e+00    

2553           +1             O4             1000           3.14286e+05    1.09854e-02    0.00000e+00    

2554           +1             O4             1000           3.71429e+05    1.09854e-02    0.00000e+00    

2555           +1             O4             1000           4.28571e+05    1.09854e-02    0.00000e+00    

2556           +1             O4             1000           4.85714e+05    1.09854e-02    0.00000e+00    

2557           +1             O4             1000           5.42857e+05    1.09854e-02    0.00000e+00    

2558           +1             O4             1000           6.00000e+05    1.09854e-02    0.00000e+00    

2559           +1             O4             1000           6.57143e+05    1.09854e-02    0.00000e+00    

255            +1             O1             1000           4.28571e+05    1.59986e-02    0.00000e+00    

2560           +1             O4             1000           7.14286e+05    1.09854e-02    0.00000e+00    

2561           +1             O4             1000           7.71429e+05    1.09854e-02    0.00000e+00    

2562           +1             O4             1000           8.28571e+05    1.09854e-02    0.00000e+00    

2563           +1             O4             1000           8.85714e+05    1.09854e-02    0.00000e+00    

2564           +1             O4             1000           9.42857e+05    1.09854e-02    0.00000e+00    

2565           +1             O4             1000           1.00000e+06    1.09854e-02    0.00000e+00    

2566           +1             O4             1000           1.05714e+06    1.09854e-02    0.00000e+00    

2567           +1             O4             1000           1.11429e+06    1.09854e-02    0.00000e+00    

2568           +1             O4             1000           1.17143e+06    1.09854e-02    0.00000e+00    

2569           +1             O4             1000           1.22857e+06    1.09854e-02    0.00000e+00    

256            +1             O1             1000           4.85714e+05    1.59986e-02    0.00000e+00    

2570           +1             O4             1000           1.28571e+06    1.09854e-02    0.00000e+00    

2571           +1             O4             1000           1.34286e+06    1.09854e-02    0.00000e+00    

2572           +1             O4             1000           1.40000e+06    1.09854e-02    0.00000e+00    

2573           +1             O4             1000           1.45714e+06    1.09854e-02    0.00000e+00    

2574           +1             O4             1000           1.51429e+06    1.09854e-02    0.00000e+00    

2575           +1             O4             1000           1.57143e+06    1.09854e-02    0.00000e+00    

2576           +1             O4             1000           1.62857e+06    1.09854e-02    0.00000e+00    

2577           +1             O4             1000           1.68571e+06    1.09854e-02    0.00000e+00    

2578           +1             O4             1000           1.74286e+06    1.09854e-02    0.00000e+00    

2579           +1             O4             1000           1.80000e+06    1.09854e-02    0.00000e+00    

257            +1             O1             1000           5.42857e+05    1.59986e-02    0.00000e+00    

2580           +1             O4             1000           1.85714e+06    1.09854e-02    0.00000e+00    

2581           +1             O4             1000           1.91429e+06    1.09854e-02    0.00000e+00    

2582           +1             O4             1000           1.97143e+06    1.09854e-02    0.00000e+00    

2583           +1             O4             1000           2.02857e+06    1.09854e-02    0.00000e+00    

2584           +1             O4             1000           2.08571e+06    1.09854e-02    0.00000e+00    

2585           +1             O4             1000           2.14286e+06    1.09854e-02    0.00000e+00    

2586           +1             O4             1000           2.20000e+06    1.09854e-02    0.00000e+00    

2587           +1             O4             1000           2.25714e+06    1.09854e-02    0.00000e+00    

2588           +1             O4             1000           2.31429e+06    1.09854e-02    0.00000e+00    

2589           +1             O4             1000           2.37143e+06    1.09854e-02    0.00000e+00    

258            +1             O1             1000           6.00000e+05    1.59986e-02    0.00000e+00    

2590           +1             O4             1000           2.42857e+06    1.09854e-02    0.00000e+00    

2591           +1             O4             1000           2.48571e+06    1.09854e-02    0.00000e+00    

2592           +1             O4             1000           2.54286e+06    1.09854e-02    0.00000e+00    

2593           +1             O4             1000           2.60000e+06    1.09854e-02    0.00000e+00    

2594           +1             O4             1000           2.65714e+06    1.09854e-02    0.00000e+00    

2595           +1             O4             1000           2.71429e+06    1.09854e-02    0.00000e+00    

2596           +1             O4             1000           2.77143e+06    1.09854e-02    0.00000e+00    

2597           +1             O4             1000           2.82857e+06    1.09854e-02    1.00000e-01    

2598           +1             O4             1000           2.88571e+06    1.09854e-02    1.00000e-01    

2599           +1             O4             1000           2.94286e+06    1.09854e-02    3.00000e-01    

259            +1             O1             1000           6.57143e+05    1.59986e-02    0.00000e+00    

25             +1             O1             1000           1.57143e+06    1.00000e-02    0.00000e+00    

2600           +1             O4             1000           3.00000e+06    1.09854e-02    1.00000e-01    

2601           +1             O4             1000           2.00000e+05    1.20679e-02    0.00000e+00    

2602           +1             O4             1000           2.57143e+05    1.20679e-02    0.00000e+00    

2603           +1             O4             1000           3.14286e+05    1.20679e-02    0.00000e+00    

2604           +1             O4             1000           3.71429e+05    1.20679e-02    0.00000e+00    

2605           +1             O4             1000           4.28571e+05    1.20679e-02    0.00000e+00    

2606           +1             O4             1000           4.85714e+05    1.20679e-02    0.00000e+00    

2607           +1             O4             1000           5.42857e+05    1.20679e-02    0.00000e+00    

2608           +1             O4             1000           6.00000e+05    1.20679e-02    0.00000e+00    

2609           +1             O4             1000           6.57143e+05    1.20679e-02    0.00000e+00    

260            +1             O1             1000           7.14286e+05    1.59986e-02    0.00000e+00    

2610           +1             O4             1000           7.14286e+05    1.20679e-02    0.00000e+00    

2611           +1             O4             1000           7.71429e+05    1.20679e-02    0.00000e+00    

2612           +1             O4             1000           8.28571e+05    1.20679e-02    0.00000e+00    

2613           +1             O4             1000           8.85714e+05    1.20679e-02    0.00000e+00    

2614           +1             O4             1000           9.42857e+05    1.20679e-02    0.00000e+00    

2615           +1             O4             1000           1.00000e+06    1.20679e-02    0.00000e+00    

2616           +1             O4             1000           1.05714e+06    1.20679e-02    0.00000e+00    

2617           +1             O4             1000           1.11429e+06    1.20679e-02    0.00000e+00    

2618           +1             O4             1000           1.17143e+06    1.20679e-02    0.00000e+00    

2619           +1             O4             1000           1.22857e+06    1.20679e-02    0.00000e+00    

261            +1             O1             1000           7.71429e+05    1.59986e-02    0.00000e+00    

2620           +1             O4             1000           1.28571e+06    1.20679e-02    0.00000e+00    

2621           +1             O4             1000           1.34286e+06    1.20679e-02    0.00000e+00    

2622           +1             O4             1000           1.40000e+06    1.20679e-02    0.00000e+00    

2623           +1             O4             1000           1.45714e+06    1.20679e-02    0.00000e+00    

2624           +1             O4             1000           1.51429e+06    1.20679e-02    0.00000e+00    

2625           +1             O4             1000           1.57143e+06    1.20679e-02    0.00000e+00    

2626           +1             O4             1000           1.62857e+06    1.20679e-02    0.00000e+00    

2627           +1             O4             1000           1.68571e+06    1.20679e-02    0.00000e+00    

2628           +1             O4             1000           1.74286e+06    1.20679e-02    0.00000e+00    

2629           +1             O4             1000           1.80000e+06    1.20679e-02    0.00000e+00    

262            +1             O1             1000           8.28571e+05    1.59986e-02    0.00000e+00    

2630           +1             O4             1000           1.85714e+06    1.20679e-02    0.00000e+00    

2631           +1             O4             1000           1.91429e+06    1.20679e-02    0.00000e+00    

2632           +1             O4             1000           1.97143e+06    1.20679e-02    0.00000e+00    

2633           +1             O4             1000           2.02857e+06    1.20679e-02    0.00000e+00    

2634           +1             O4             1000           2.08571e+06    1.20679e-02    0.00000e+00    

2635           +1             O4             1000           2.14286e+06    1.20679e-02    0.00000e+00    

2636           +1             O4             1000           2.20000e+06    1.20679e-02    0.00000e+00    

2637           +1             O4             1000           2.25714e+06    1.20679e-02    0.00000e+00    

2638           +1             O4             1000           2.31429e+06    1.20679e-02    0.00000e+00    

2639           +1             O4             1000           2.37143e+06    1.20679e-02    0.00000e+00    

263            +1             O1             1000           8.85714e+05    1.59986e-02    0.00000e+00    

2640           +1             O4             1000           2.42857e+06    1.20679e-02    0.00000e+00    

2641           +1             O4             1000           2.48571e+06    1.20679e-02    0.00000e+00    

2642           +1             O4             1000           2.54286e+06    1.20679e-02    0.00000e+00    

2643           +1             O4             1000           2.60000e+06    1.20679e-02    0.00000e+00    

2644           +1             O4             1000           2.65714e+06    1.20679e-02    0.00000e+00    

2645           +1             O4             1000           2.71429e+06    1.20679e-02    0.00000e+00    

2646           +1             O4             1000           2.77143e+06    1.20679e-02    3.00000e-01    

2647           +1             O4             1000           2.82857e+06    1.20679e-02    0.00000e+00    

2648           +1             O4             1000           2.88571e+06    1.20679e-02    6.00000e-01    

2649           +1             O4             1000           2.94286e+06    1.20679e-02    1.00000e+00    

264            +1             O1             1000           9.42857e+05    1.59986e-02    0.00000e+00    

2650           +1             O4             1000           3.00000e+06    1.20679e-02    7.00000e-01    

2651           +1             O4             1000           2.00000e+05    1.32571e-02    0.00000e+00    

2652           +1             O4             1000           2.57143e+05    1.32571e-02    0.00000e+00    

2653           +1             O4             1000           3.14286e+05    1.32571e-02    0.00000e+00    

2654           +1             O4             1000           3.71429e+05    1.32571e-02    0.00000e+00    

2655           +1             O4             1000           4.28571e+05    1.32571e-02    0.00000e+00    

2656           +1             O4             1000           4.85714e+05    1.32571e-02    0.00000e+00    

2657           +1             O4             1000           5.42857e+05    1.32571e-02    0.00000e+00    

2658           +1             O4             1000           6.00000e+05    1.32571e-02    0.00000e+00    

2659           +1             O4             1000           6.57143e+05    1.32571e-02    0.00000e+00    

265            +1             O1             1000           1.00000e+06    1.59986e-02    0.00000e+00    

2660           +1             O4             1000           7.14286e+05    1.32571e-02    0.00000e+00    

2661           +1             O4             1000           7.71429e+05    1.32571e-02    0.00000e+00    

2662           +1             O4             1000           8.28571e+05    1.32571e-02    0.00000e+00    

2663           +1             O4             1000           8.85714e+05    1.32571e-02    0.00000e+00    

2664           +1             O4             1000           9.42857e+05    1.32571e-02    0.00000e+00    

2665           +1             O4             1000           1.00000e+06    1.32571e-02    0.00000e+00    

2666           +1             O4             1000           1.05714e+06    1.32571e-02    0.00000e+00    

2667           +1             O4             1000           1.11429e+06    1.32571e-02    0.00000e+00    

2668           +1             O4             1000           1.17143e+06    1.32571e-02    0.00000e+00    

2669           +1             O4             1000           1.22857e+06    1.32571e-02    0.00000e+00    

266            +1             O1             1000           1.05714e+06    1.59986e-02    0.00000e+00    

2670           +1             O4             1000           1.28571e+06    1.32571e-02    0.00000e+00    

2671           +1             O4             1000           1.34286e+06    1.32571e-02    0.00000e+00    

2672           +1             O4             1000           1.40000e+06    1.32571e-02    0.00000e+00    

2673           +1             O4             1000           1.45714e+06    1.32571e-02    0.00000e+00    

2674           +1             O4             1000           1.51429e+06    1.32571e-02    0.00000e+00    

2675           +1             O4             1000           1.57143e+06    1.32571e-02    0.00000e+00    

2676           +1             O4             1000           1.62857e+06    1.32571e-02    0.00000e+00    

2677           +1             O4             1000           1.68571e+06    1.32571e-02    0.00000e+00    

2678           +1             O4             1000           1.74286e+06    1.32571e-02    0.00000e+00    

2679           +1             O4             1000           1.80000e+06    1.32571e-02    0.00000e+00    

267            +1             O1             1000           1.11429e+06    1.59986e-02    0.00000e+00    

2680           +1             O4             1000           1.85714e+06    1.32571e-02    0.00000e+00    

2681           +1             O4             1000           1.91429e+06    1.32571e-02    0.00000e+00    

2682           +1             O4             1000           1.97143e+06    1.32571e-02    0.00000e+00    

2683           +1             O4             1000           2.02857e+06    1.32571e-02    0.00000e+00    

2684           +1             O4             1000           2.08571e+06    1.32571e-02    0.00000e+00    

2685           +1             O4             1000           2.14286e+06    1.32571e-02    0.00000e+00    

2686           +1             O4             1000           2.20000e+06    1.32571e-02    0.00000e+00    

2687           +1             O4             1000           2.25714e+06    1.32571e-02    1.00000e-01    

2688           +1             O4             1000           2.31429e+06    1.32571e-02    0.00000e+00    

2689           +1             O4             1000           2.37143e+06    1.32571e-02    0.00000e+00    

268            +1             O1             1000           1.17143e+06    1.59986e-02    0.00000e+00    

2690           +1             O4             1000           2.42857e+06    1.32571e-02    0.00000e+00    

2691           +1             O4             1000           2.48571e+06    1.32571e-02    0.00000e+00    

2692           +1             O4             1000           2.54286e+06    1.32571e-02    1.00000e-01    

2693           +1             O4             1000           2.60000e+06    1.32571e-02    1.00000e-01    

2694           +1             O4             1000           2.65714e+06    1.32571e-02    5.00000e-01    

2695           +1             O4             1000           2.71429e+06    1.32571e-02    2.00000e-01    

2696           +1             O4             1000           2.77143e+06    1.32571e-02    8.00000e-01    

2697           +1             O4             1000           2.82857e+06    1.32571e-02    1.30000e+00    

2698           +1             O4             1000           2.88571e+06    1.32571e-02    1.60000e+00    

2699           +1             O4             1000           2.94286e+06    1.32571e-02    1.50000e+00    

269            +1             O1             1000           1.22857e+06    1.59986e-02    0.00000e+00    

26             +1             O1             1000           1.62857e+06    1.00000e-02    0.00000e+00    

2700           +1             O4             1000           3.00000e+06    1.32571e-02    2.40000e+00    

2701           +1             O4             1000           2.00000e+05    1.45635e-02    0.00000e+00    

2702           +1             O4             1000           2.57143e+05    1.45635e-02    0.00000e+00    

2703           +1             O4             1000           3.14286e+05    1.45635e-02    0.00000e+00    

2704           +1             O4             1000           3.71429e+05    1.45635e-02    0.00000e+00    

2705           +1             O4             1000           4.28571e+05    1.45635e-02    0.00000e+00    

2706           +1             O4             1000           4.85714e+05    1.45635e-02    0.00000e+00    

2707           +1             O4             1000           5.42857e+05    1.45635e-02    0.00000e+00    

2708           +1             O4             1000           6.00000e+05    1.45635e-02    0.00000e+00    

2709           +1             O4             1000           6.57143e+05    1.45635e-02    0.00000e+00    

270            +1             O1             1000           1.28571e+06    1.59986e-02    0.00000e+00    

2710           +1             O4             1000           7.14286e+05    1.45635e-02    0.00000e+00    

2711           +1             O4             1000           7.71429e+05    1.45635e-02    0.00000e+00    

2712           +1             O4             1000           8.28571e+05    1.45635e-02    0.00000e+00    

2713           +1             O4             1000           8.85714e+05    1.45635e-02    0.00000e+00    

2714           +1             O4             1000           9.42857e+05    1.45635e-02    0.00000e+00    

2715           +1             O4             1000           1.00000e+06    1.45635e-02    0.00000e+00    

2716           +1             O4             1000           1.05714e+06    1.45635e-02    0.00000e+00    

2717           +1             O4             1000           1.11429e+06    1.45635e-02    0.00000e+00    

2718           +1             O4             1000           1.17143e+06    1.45635e-02    0.00000e+00    

2719           +1             O4             1000           1.22857e+06    1.45635e-02    0.00000e+00    

271            +1             O1             1000           1.34286e+06    1.59986e-02    0.00000e+00    

2720           +1             O4             1000           1.28571e+06    1.45635e-02    0.00000e+00    

2721           +1             O4             1000           1.34286e+06    1.45635e-02    0.00000e+00    

2722           +1             O4             1000           1.40000e+06    1.45635e-02    0.00000e+00    

2723           +1             O4             1000           1.45714e+06    1.45635e-02    0.00000e+00    

2724           +1             O4             1000           1.51429e+06    1.45635e-02    0.00000e+00    

2725           +1             O4             1000           1.57143e+06    1.45635e-02    0.00000e+00    

2726           +1             O4             1000           1.62857e+06    1.45635e-02    0.00000e+00    

2727           +1             O4             1000           1.68571e+06    1.45635e-02    0.00000e+00    

2728           +1             O4             1000           1.74286e+06    1.45635e-02    0.00000e+00    

2729           +1             O4             1000           1.80000e+06    1.45635e-02    0.00000e+00    

272            +1             O1             1000           1.40000e+06    1.59986e-02    0.00000e+00    

2730           +1             O4             1000           1.85714e+06    1.45635e-02    0.00000e+00    

2731           +1             O4             1000           1.91429e+06    1.45635e-02    0.00000e+00    

2732           +1             O4             1000           1.97143e+06    1.45635e-02    0.00000e+00    

2733           +1             O4             1000           2.02857e+06    1.45635e-02    0.00000e+00    

2734           +1             O4             1000           2.08571e+06    1.45635e-02    0.00000e+00    

2735           +1             O4             1000           2.14286e+06    1.45635e-02    0.00000e+00    

2736           +1             O4             1000           2.20000e+06    1.45635e-02    0.00000e+00    

2737           +1             O4             1000           2.25714e+06    1.45635e-02    0.00000e+00    

2738           +1             O4             1000           2.31429e+06    1.45635e-02    0.00000e+00    

2739           +1             O4             1000           2.37143e+06    1.45635e-02    1.00000e-01    

273            +1             O1             1000           1.45714e+06    1.59986e-02    0.00000e+00    

2740           +1             O4             1000           2.42857e+06    1.45635e-02    2.00000e-01    

2741           +1             O4             1000           2.48571e+06    1.45635e-02    1.00000e-01    

2742           +1             O4             1000           2.54286e+06    1.45635e-02    2.00000e-01    

2743           +1             O4             1000           2.60000e+06    1.45635e-02    5.00000e-01    

2744           +1             O4             1000           2.65714e+06    1.45635e-02    1.10000e+00    

2745           +1             O4             1000           2.71429e+06    1.45635e-02    1.30000e+00    

2746           +1             O4             1000           2.77143e+06    1.45635e-02    2.40000e+00    

2747           +1             O4             1000           2.82857e+06    1.45635e-02    2.90000e+00    

2748           +1             O4             1000           2.88571e+06    1.45635e-02    3.10000e+00    

2749           +1             O4             1000           2.94286e+06    1.45635e-02    5.30000e+00    

274            +1             O1             1000           1.51429e+06    1.59986e-02    0.00000e+00    

2750           +1             O4             1000           3.00000e+06    1.45635e-02    5.90000e+00    

2751           +1             O4             1000           2.00000e+05    1.59986e-02    0.00000e+00    

2752           +1             O4             1000           2.57143e+05    1.59986e-02    0.00000e+00    

2753           +1             O4             1000           3.14286e+05    1.59986e-02    0.00000e+00    

2754           +1             O4             1000           3.71429e+05    1.59986e-02    0.00000e+00    

2755           +1             O4             1000           4.28571e+05    1.59986e-02    0.00000e+00    

2756           +1             O4             1000           4.85714e+05    1.59986e-02    0.00000e+00    

2757           +1             O4             1000           5.42857e+05    1.59986e-02    0.00000e+00    

2758           +1             O4             1000           6.00000e+05    1.59986e-02    0.00000e+00    

2759           +1             O4             1000           6.57143e+05    1.59986e-02    0.00000e+00    

275            +1             O1             1000           1.57143e+06    1.59986e-02    0.00000e+00    

2760           +1             O4             1000           7.14286e+05    1.59986e-02    0.00000e+00    

2761           +1             O4             1000           7.71429e+05    1.59986e-02    0.00000e+00    

2762           +1             O4             1000           8.28571e+05    1.59986e-02    0.00000e+00    

2763           +1             O4             1000           8.85714e+05    1.59986e-02    0.00000e+00    

2764           +1             O4             1000           9.42857e+05    1.59986e-02    0.00000e+00    

2765           +1             O4             1000           1.00000e+06    1.59986e-02    0.00000e+00    

2766           +1             O4             1000           1.05714e+06    1.59986e-02    0.00000e+00    

2767           +1             O4             1000           1.11429e+06    1.59986e-02    0.00000e+00    

2768           +1             O4             1000           1.17143e+06    1.59986e-02    0.00000e+00    

2769           +1             O4             1000           1.22857e+06    1.59986e-02    0.00000e+00    

276            +1             O1             1000           1.62857e+06    1.59986e-02    0.00000e+00    

2770           +1             O4             1000           1.28571e+06    1.59986e-02    0.00000e+00    

2771           +1             O4             1000           1.34286e+06    1.59986e-02    0.00000e+00    

2772           +1             O4             1000           1.40000e+06    1.59986e-02    0.00000e+00    

2773           +1             O4             1000           1.45714e+06    1.59986e-02    0.00000e+00    

2774           +1             O4             1000           1.51429e+06    1.59986e-02    0.00000e+00    

2775           +1             O4             1000           1.57143e+06    1.59986e-02    0.00000e+00    

2776           +1             O4             1000           1.62857e+06    1.59986e-02    0.00000e+00    

2777           +1             O4             1000           1.68571e+06    1.59986e-02    0.00000e+00    

2778           +1             O4             1000           1.74286e+06    1.59986e-02    0.00000e+00    

2779           +1             O4             1000           1.80000e+06    1.59986e-02    0.00000e+00    

277            +1             O1             1000           1.68571e+06    1.59986e-02    0.00000e+00    

2780           +1             O4             1000           1.85714e+06    1.59986e-02    0.00000e+00    

2781           +1             O4             1000           1.91429e+06    1.59986e-02    0.00000e+00    

2782           +1             O4             1000           1.97143e+06    1.59986e-02    0.00000e+00    

2783           +1             O4             1000           2.02857e+06    1.59986e-02    0.00000e+00    

2784           +1             O4             1000           2.08571e+06    1.59986e-02    0.00000e+00    

2785           +1             O4             1000           2.14286e+06    1.59986e-02    2.00000e-01    

2786           +1             O4             1000           2.20000e+06    1.59986e-02    0.00000e+00    

2787           +1             O4             1000           2.25714e+06    1.59986e-02    1.00000e-01    

2788           +1             O4             1000           2.31429e+06    1.59986e-02    5.00000e-01    

2789           +1             O4             1000           2.37143e+06    1.59986e-02    7.00000e-01    

278            +1             O1             1000           1.74286e+06    1.59986e-02    0.00000e+00    

2790           +1             O4             1000           2.42857e+06    1.59986e-02    1.00000e+00    

2791           +1             O4             1000           2.48571e+06    1.59986e-02    5.00000e-01    

2792           +1             O4             1000           2.54286e+06    1.59986e-02    2.40000e+00    

2793           +1             O4             1000           2.60000e+06    1.59986e-02    1.90000e+00    

2794           +1             O4             1000           2.65714e+06    1.59986e-02    2.90000e+00    

2795           +1             O4             1000           2.71429e+06    1.59986e-02    4.00000e+00    

2796           +1             O4             1000           2.77143e+06    1.59986e-02    4.60000e+00    

2797           +1             O4             1000           2.82857e+06    1.59986e-02    6.60000e+00    

2798           +1             O4             1000           2.88571e+06    1.59986e-02    8.40000e+00    

2799           +1             O4             1000           2.94286e+06    1.59986e-02    1.05000e+01    

279            +1             O1             1000           1.80000e+06    1.59986e-02    0.00000e+00    

27             +1             O1             1000           1.68571e+06    1.00000e-02    0.00000e+00    

2800           +1             O4             1000           3.00000e+06    1.59986e-02    1.14000e+01    

2801           +1             O4             1000           2.00000e+05    1.75751e-02    0.00000e+00    

2802           +1             O4             1000           2.57143e+05    1.75751e-02    0.00000e+00    

2803           +1             O4             1000           3.14286e+05    1.75751e-02    0.00000e+00    

2804           +1             O4             1000           3.71429e+05    1.75751e-02    0.00000e+00    

2805           +1             O4             1000           4.28571e+05    1.75751e-02    0.00000e+00    

2806           +1             O4             1000           4.85714e+05    1.75751e-02    0.00000e+00    

2807           +1             O4             1000           5.42857e+05    1.75751e-02    0.00000e+00    

2808           +1             O4             1000           6.00000e+05    1.75751e-02    0.00000e+00    

2809           +1             O4             1000           6.57143e+05    1.75751e-02    0.00000e+00    

280            +1             O1             1000           1.85714e+06    1.59986e-02    0.00000e+00    

2810           +1             O4             1000           7.14286e+05    1.75751e-02    0.00000e+00    

2811           +1             O4             1000           7.71429e+05    1.75751e-02    0.00000e+00    

2812           +1             O4             1000           8.28571e+05    1.75751e-02    0.00000e+00    

2813           +1             O4             1000           8.85714e+05    1.75751e-02    0.00000e+00    

2814           +1             O4             1000           9.42857e+05    1.75751e-02    0.00000e+00    

2815           +1             O4             1000           1.00000e+06    1.75751e-02    0.00000e+00    

2816           +1             O4             1000           1.05714e+06    1.75751e-02    0.00000e+00    

2817           +1             O4             1000           1.11429e+06    1.75751e-02    0.00000e+00    

2818           +1             O4             1000           1.17143e+06    1.75751e-02    0.00000e+00    

2819           +1             O4             1000           1.22857e+06    1.75751e-02    0.00000e+00    

281            +1             O1             1000           1.91429e+06    1.59986e-02    0.00000e+00    

2820           +1             O4             1000           1.28571e+06    1.75751e-02    0.00000e+00    

2821           +1             O4             1000           1.34286e+06    1.75751e-02    0.00000e+00    

2822           +1             O4             1000           1.40000e+06    1.75751e-02    0.00000e+00    

2823           +1             O4             1000           1.45714e+06    1.75751e-02    0.00000e+00    

2824           +1             O4             1000           1.51429e+06    1.75751e-02    0.00000e+00    

2825           +1             O4             1000           1.57143e+06    1.75751e-02    0.00000e+00    

2826           +1             O4             1000           1.62857e+06    1.75751e-02    0.00000e+00    

2827           +1             O4             1000           1.68571e+06    1.75751e-02    0.00000e+00    

2828           +1             O4             1000           1.74286e+06    1.75751e-02    0.00000e+00    

2829           +1             O4             1000           1.80000e+06    1.75751e-02    0.00000e+00    

282            +1             O1             1000           1.97143e+06    1.59986e-02    0.00000e+00    

2830           +1             O4             1000           1.85714e+06    1.75751e-02    0.00000e+00    

2831           +1             O4             1000           1.91429e+06    1.75751e-02    0.00000e+00    

2832           +1             O4             1000           1.97143e+06    1.75751e-02    0.00000e+00    

2833           +1             O4             1000           2.02857e+06    1.75751e-02    1.00000e-01    

2834           +1             O4             1000           2.08571e+06    1.75751e-02    3.00000e-01    

2835           +1             O4             1000           2.14286e+06    1.75751e-02    3.00000e-01    

2836           +1             O4             1000           2.20000e+06    1.75751e-02    4.00000e-01    

2837           +1             O4             1000           2.25714e+06    1.75751e-02    5.00000e-01    

2838           +1             O4             1000           2.31429e+06    1.75751e-02    1.00000e+00    

2839           +1             O4             1000           2.37143e+06    1.75751e-02    2.10000e+00    

283            +1             O1             1000           2.02857e+06    1.59986e-02    0.00000e+00    

2840           +1             O4             1000           2.42857e+06    1.75751e-02    2.30000e+00    

2841           +1             O4             1000           2.48571e+06    1.75751e-02    3.50000e+00    

2842           +1             O4             1000           2.54286e+06    1.75751e-02    4.50000e+00    

2843           +1             O4             1000           2.60000e+06    1.75751e-02    6.00000e+00    

2844           +1             O4             1000           2.65714e+06    1.75751e-02    7.30000e+00    

2845           +1             O4             1000           2.71429e+06    1.75751e-02    8.10000e+00    

2846           +1             O4             1000           2.77143e+06    1.75751e-02    1.05000e+01    

2847           +1             O4             1000           2.82857e+06    1.75751e-02    1.31000e+01    

2848           +1             O4             1000           2.88571e+06    1.75751e-02    1.47000e+01    

2849           +1             O4             1000           2.94286e+06    1.75751e-02    1.69000e+01    

284            +1             O1             1000           2.08571e+06    1.59986e-02    0.00000e+00    

2850           +1             O4             1000           3.00000e+06    1.75751e-02    1.95000e+01    

2851           +1             O4             1000           2.00000e+05    1.93070e-02    0.00000e+00    

2852           +1             O4             1000           2.57143e+05    1.93070e-02    0.00000e+00    

2853           +1             O4             1000           3.14286e+05    1.93070e-02    0.00000e+00    

2854           +1             O4             1000           3.71429e+05    1.93070e-02    0.00000e+00    

2855           +1             O4             1000           4.28571e+05    1.93070e-02    0.00000e+00    

2856           +1             O4             1000           4.85714e+05    1.93070e-02    0.00000e+00    

2857           +1             O4             1000           5.42857e+05    1.93070e-02    0.00000e+00    

2858           +1             O4             1000           6.00000e+05    1.93070e-02    0.00000e+00    

2859           +1             O4             1000           6.57143e+05    1.93070e-02    0.00000e+00    

285            +1             O1             1000           2.14286e+06    1.59986e-02    0.00000e+00    

2860           +1             O4             1000           7.14286e+05    1.93070e-02    0.00000e+00    

2861           +1             O4             1000           7.71429e+05    1.93070e-02    0.00000e+00    

2862           +1             O4             1000           8.28571e+05    1.93070e-02    0.00000e+00    

2863           +1             O4             1000           8.85714e+05    1.93070e-02    0.00000e+00    

2864           +1             O4             1000           9.42857e+05    1.93070e-02    0.00000e+00    

2865           +1             O4             1000           1.00000e+06    1.93070e-02    0.00000e+00    

2866           +1             O4             1000           1.05714e+06    1.93070e-02    0.00000e+00    

2867           +1             O4             1000           1.11429e+06    1.93070e-02    0.00000e+00    

2868           +1             O4             1000           1.17143e+06    1.93070e-02    0.00000e+00    

2869           +1             O4             1000           1.22857e+06    1.93070e-02    0.00000e+00    

286            +1             O1             1000           2.20000e+06    1.59986e-02    0.00000e+00    

2870           +1             O4             1000           1.28571e+06    1.93070e-02    0.00000e+00    

2871           +1             O4             1000           1.34286e+06    1.93070e-02    0.00000e+00    

2872           +1             O4             1000           1.40000e+06    1.93070e-02    0.00000e+00    

2873           +1             O4             1000           1.45714e+06    1.93070e-02    0.00000e+00    

2874           +1             O4             1000           1.51429e+06    1.93070e-02    0.00000e+00    

2875           +1             O4             1000           1.57143e+06    1.93070e-02    0.00000e+00    

2876           +1             O4             1000           1.62857e+06    1.93070e-02    0.00000e+00    

2877           +1             O4             1000           1.68571e+06    1.93070e-02    0.00000e+00    

2878           +1             O4             1000           1.74286e+06    1.93070e-02    0.00000e+00    

2879           +1             O4             1000           1.80000e+06    1.93070e-02    0.00000e+00    

287            +1             O1             1000           2.25714e+06    1.59986e-02    0.00000e+00    

2880           +1             O4             1000           1.85714e+06    1.93070e-02    1.00000e-01    

2881           +1             O4             1000           1.91429e+06    1.93070e-02    1.00000e-01    

2882           +1             O4             1000           1.97143e+06    1.93070e-02    0.00000e+00    

2883           +1             O4             1000           2.02857e+06    1.93070e-02    2.00000e-01    

2884           +1             O4             1000           2.08571e+06    1.93070e-02    4.00000e-01    

2885           +1             O4             1000           2.14286e+06    1.93070e-02    2.00000e-01    

2886           +1             O4             1000           2.20000e+06    1.93070e-02    2.20000e+00    

2887           +1             O4             1000           2.25714e+06    1.93070e-02    2.70000e+00    

2888           +1             O4             1000           2.31429e+06    1.93070e-02    2.70000e+00    

2889           +1             O4             1000           2.37143e+06    1.93070e-02    3.70000e+00    

288            +1             O1             1000           2.31429e+06    1.59986e-02    0.00000e+00    

2890           +1             O4             1000           2.42857e+06    1.93070e-02    6.60000e+00    

2891           +1             O4             1000           2.48571e+06    1.93070e-02    7.10000e+00    

2892           +1             O4             1000           2.54286e+06    1.93070e-02    1.06000e+01    

2893           +1             O4             1000           2.60000e+06    1.93070e-02    1.45000e+01    

2894           +1             O4             1000           2.65714e+06    1.93070e-02    1.38000e+01    

2895           +1             O4             1000           2.71429e+06    1.93070e-02    1.79000e+01    

2896           +1             O4             1000           2.77143e+06    1.93070e-02    1.98000e+01    

2897           +1             O4             1000           2.82857e+06    1.93070e-02    2.33000e+01    

2898           +1             O4             1000           2.88571e+06    1.93070e-02    2.57000e+01    

2899           +1             O4             1000           2.94286e+06    1.93070e-02    2.48000e+01    

289            +1             O1             1000           2.37143e+06    1.59986e-02    0.00000e+00    

28             +1             O1             1000           1.74286e+06    1.00000e-02    0.00000e+00    

2900           +1             O4             1000           3.00000e+06    1.93070e-02    2.79000e+01    

2901           +1             O4             1000           2.00000e+05    2.12095e-02    0.00000e+00    

2902           +1             O4             1000           2.57143e+05    2.12095e-02    0.00000e+00    

2903           +1             O4             1000           3.14286e+05    2.12095e-02    0.00000e+00    

2904           +1             O4             1000           3.71429e+05    2.12095e-02    0.00000e+00    

2905           +1             O4             1000           4.28571e+05    2.12095e-02    0.00000e+00    

2906           +1             O4             1000           4.85714e+05    2.12095e-02    0.00000e+00    

2907           +1             O4             1000           5.42857e+05    2.12095e-02    0.00000e+00    

2908           +1             O4             1000           6.00000e+05    2.12095e-02    0.00000e+00    

2909           +1             O4             1000           6.57143e+05    2.12095e-02    0.00000e+00    

290            +1             O1             1000           2.42857e+06    1.59986e-02    0.00000e+00    

2910           +1             O4             1000           7.14286e+05    2.12095e-02    0.00000e+00    

2911           +1             O4             1000           7.71429e+05    2.12095e-02    0.00000e+00    

2912           +1             O4             1000           8.28571e+05    2.12095e-02    0.00000e+00    

2913           +1             O4             1000           8.85714e+05    2.12095e-02    0.00000e+00    

2914           +1             O4             1000           9.42857e+05    2.12095e-02    0.00000e+00    

2915           +1             O4             1000           1.00000e+06    2.12095e-02    0.00000e+00    

2916           +1             O4             1000           1.05714e+06    2.12095e-02    0.00000e+00    

2917           +1             O4             1000           1.11429e+06    2.12095e-02    0.00000e+00    

2918           +1             O4             1000           1.17143e+06    2.12095e-02    0.00000e+00    

2919           +1             O4             1000           1.22857e+06    2.12095e-02    0.00000e+00    

291            +1             O1             1000           2.48571e+06    1.59986e-02    0.00000e+00    

2920           +1             O4             1000           1.28571e+06    2.12095e-02    0.00000e+00    

2921           +1             O4             1000           1.34286e+06    2.12095e-02    0.00000e+00    

2922           +1             O4             1000           1.40000e+06    2.12095e-02    0.00000e+00    

2923           +1             O4             1000           1.45714e+06    2.12095e-02    0.00000e+00    

2924           +1             O4             1000           1.51429e+06    2.12095e-02    0.00000e+00    

2925           +1             O4             1000           1.57143e+06    2.12095e-02    0.00000e+00    

2926           +1             O4             1000           1.62857e+06    2.12095e-02    0.00000e+00    

2927           +1             O4             1000           1.68571e+06    2.12095e-02    0.00000e+00    

2928           +1             O4             1000           1.74286e+06    2.12095e-02    0.00000e+00    

2929           +1             O4             1000           1.80000e+06    2.12095e-02    1.00000e-01    

292            +1             O1             1000           2.54286e+06    1.59986e-02    0.00000e+00    

2930           +1             O4             1000           1.85714e+06    2.12095e-02    4.00000e-01    

2931           +1             O4             1000           1.91429e+06    2.12095e-02    5.00000e-01    

2932           +1             O4             1000           1.97143e+06    2.12095e-02    9.00000e-01    

2933           +1             O4             1000           2.02857e+06    2.12095e-02    1.80000e+00    

2934           +1             O4             1000           2.08571e+06    2.12095e-02    2.20000e+00    

2935           +1             O4             1000           2.14286e+06    2.12095e-02    4.00000e+00    

2936           +1             O4             1000           2.20000e+06    2.12095e-02    4.10000e+00    

2937           +1             O4             1000           2.25714e+06    2.12095e-02    6.70000e+00    

2938           +1             O4             1000           2.31429e+06    2.12095e-02    1.05000e+01    

2939           +1             O4             1000           2.37143e+06    2.12095e-02    1.17000e+01    

293            +1             O1             1000           2.60000e+06    1.59986e-02    0.00000e+00    

2940           +1             O4             1000           2.42857e+06    2.12095e-02    1.37000e+01    

2941           +1             O4             1000           2.48571e+06    2.12095e-02    1.61000e+01    

2942           +1             O4             1000           2.54286e+06    2.12095e-02    1.82000e+01    

2943           +1             O4             1000           2.60000e+06    2.12095e-02    2.16000e+01    

2944           +1             O4             1000           2.65714e+06    2.12095e-02    2.44000e+01    

2945           +1             O4             1000           2.71429e+06    2.12095e-02    2.72000e+01    

2946           +1             O4             1000           2.77143e+06    2.12095e-02    3.04000e+01    

2947           +1             O4             1000           2.82857e+06    2.12095e-02    3.09000e+01    

2948           +1             O4             1000           2.88571e+06    2.12095e-02    3.61000e+01    

2949           +1             O4             1000           2.94286e+06    2.12095e-02    3.78000e+01    

294            +1             O1             1000           2.65714e+06    1.59986e-02    0.00000e+00    

2950           +1             O4             1000           3.00000e+06    2.12095e-02    4.09000e+01    

2951           +1             O4             1000           2.00000e+05    2.32995e-02    0.00000e+00    

2952           +1             O4             1000           2.57143e+05    2.32995e-02    0.00000e+00    

2953           +1             O4             1000           3.14286e+05    2.32995e-02    0.00000e+00    

2954           +1             O4             1000           3.71429e+05    2.32995e-02    0.00000e+00    

2955           +1             O4             1000           4.28571e+05    2.32995e-02    0.00000e+00    

2956           +1             O4             1000           4.85714e+05    2.32995e-02    0.00000e+00    

2957           +1             O4             1000           5.42857e+05    2.32995e-02    0.00000e+00    

2958           +1             O4             1000           6.00000e+05    2.32995e-02    0.00000e+00    

2959           +1             O4             1000           6.57143e+05    2.32995e-02    0.00000e+00    

295            +1             O1             1000           2.71429e+06    1.59986e-02    0.00000e+00    

2960           +1             O4             1000           7.14286e+05    2.32995e-02    0.00000e+00    

2961           +1             O4             1000           7.71429e+05    2.32995e-02    0.00000e+00    

2962           +1             O4             1000           8.28571e+05    2.32995e-02    0.00000e+00    

2963           +1             O4             1000           8.85714e+05    2.32995e-02    0.00000e+00    

2964           +1             O4             1000           9.42857e+05    2.32995e-02    0.00000e+00    

2965           +1             O4             1000           1.00000e+06    2.32995e-02    0.00000e+00    

2966           +1             O4             1000           1.05714e+06    2.32995e-02    0.00000e+00    

2967           +1             O4             1000           1.11429e+06    2.32995e-02    0.00000e+00    

2968           +1             O4             1000           1.17143e+06    2.32995e-02    0.00000e+00    

2969           +1             O4             1000           1.22857e+06    2.32995e-02    0.00000e+00    

296            +1             O1             1000           2.77143e+06    1.59986e-02    0.00000e+00    

2970           +1             O4             1000           1.28571e+06    2.32995e-02    0.00000e+00    

2971           +1             O4             1000           1.34286e+06    2.32995e-02    0.00000e+00    

2972           +1             O4             1000           1.40000e+06    2.32995e-02    0.00000e+00    

2973           +1             O4             1000           1.45714e+06    2.32995e-02    0.00000e+00    

2974           +1             O4             1000           1.51429e+06    2.32995e-02    1.00000e-01    

2975           +1             O4             1000           1.57143e+06    2.32995e-02    0.00000e+00    

2976           +1             O4             1000           1.62857e+06    2.32995e-02    1.00000e-01    

2977           +1             O4             1000           1.68571e+06    2.32995e-02    1.00000e-01    

2978           +1             O4             1000           1.74286e+06    2.32995e-02    1.00000e-01    

2979           +1             O4             1000           1.80000e+06    2.32995e-02    4.00000e-01    

297            +1             O1             1000           2.82857e+06    1.59986e-02    0.00000e+00    

2980           +1             O4             1000           1.85714e+06    2.32995e-02    9.00000e-01    

2981           +1             O4             1000           1.91429e+06    2.32995e-02    1.80000e+00    

2982           +1             O4             1000           1.97143e+06    2.32995e-02    2.70000e+00    

2983           +1             O4             1000           2.02857e+06    2.32995e-02    3.80000e+00    

2984           +1             O4             1000           2.08571e+06    2.32995e-02    5.90000e+00    

2985           +1             O4             1000           2.14286e+06    2.32995e-02    7.90000e+00    

2986           +1             O4             1000           2.20000e+06    2.32995e-02    1.23000e+01    

2987           +1             O4             1000           2.25714e+06    2.32995e-02    1.34000e+01    

2988           +1             O4             1000           2.31429e+06    2.32995e-02    1.42000e+01    

2989           +1             O4             1000           2.37143e+06    2.32995e-02    1.65000e+01    

298            +1             O1             1000           2.88571e+06    1.59986e-02    0.00000e+00    

2990           +1             O4             1000           2.42857e+06    2.32995e-02    2.14000e+01    

2991           +1             O4             1000           2.48571e+06    2.32995e-02    2.23000e+01    

2992           +1             O4             1000           2.54286e+06    2.32995e-02    2.69000e+01    

2993           +1             O4             1000           2.60000e+06    2.32995e-02    3.10000e+01    

2994           +1             O4             1000           2.65714e+06    2.32995e-02    3.65000e+01    

2995           +1             O4             1000           2.71429e+06    2.32995e-02    3.69000e+01    

2996           +1             O4             1000           2.77143e+06    2.32995e-02    4.26000e+01    

2997           +1             O4             1000           2.82857e+06    2.32995e-02    4.22000e+01    

2998           +1             O4             1000           2.88571e+06    2.32995e-02    4.54000e+01    

2999           +1             O4             1000           2.94286e+06    2.32995e-02    5.06000e+01    

299            +1             O1             1000           2.94286e+06    1.59986e-02    0.00000e+00    

29             +1             O1             1000           1.80000e+06    1.00000e-02    0.00000e+00    

2              +1             O1             1000           2.57143e+05    1.00000e-02    0.00000e+00    

3000           +1             O4             1000           3.00000e+06    2.32995e-02    5.25000e+01    

3001           +1             O4             1000           2.00000e+05    2.55955e-02    0.00000e+00    

3002           +1             O4             1000           2.57143e+05    2.55955e-02    0.00000e+00    

3003           +1             O4             1000           3.14286e+05    2.55955e-02    0.00000e+00    

3004           +1             O4             1000           3.71429e+05    2.55955e-02    0.00000e+00    

3005           +1             O4             1000           4.28571e+05    2.55955e-02    0.00000e+00    

3006           +1             O4             1000           4.85714e+05    2.55955e-02    0.00000e+00    

3007           +1             O4             1000           5.42857e+05    2.55955e-02    0.00000e+00    

3008           +1             O4             1000           6.00000e+05    2.55955e-02    0.00000e+00    

3009           +1             O4             1000           6.57143e+05    2.55955e-02    0.00000e+00    

300            +1             O1             1000           3.00000e+06    1.59986e-02    0.00000e+00    

3010           +1             O4             1000           7.14286e+05    2.55955e-02    0.00000e+00    

3011           +1             O4             1000           7.71429e+05    2.55955e-02    0.00000e+00    

3012           +1             O4             1000           8.28571e+05    2.55955e-02    0.00000e+00    

3013           +1             O4             1000           8.85714e+05    2.55955e-02    0.00000e+00    

3014           +1             O4             1000           9.42857e+05    2.55955e-02    0.00000e+00    

3015           +1             O4             1000           1.00000e+06    2.55955e-02    0.00000e+00    

3016           +1             O4             1000           1.05714e+06    2.55955e-02    0.00000e+00    

3017           +1             O4             1000           1.11429e+06    2.55955e-02    0.00000e+00    

3018           +1             O4             1000           1.17143e+06    2.55955e-02    0.00000e+00    

3019           +1             O4             1000           1.22857e+06    2.55955e-02    0.00000e+00    

301            +1             O1             1000           2.00000e+05    1.75751e-02    0.00000e+00    

3020           +1             O4             1000           1.28571e+06    2.55955e-02    0.00000e+00    

3021           +1             O4             1000           1.34286e+06    2.55955e-02    0.00000e+00    

3022           +1             O4             1000           1.40000e+06    2.55955e-02    0.00000e+00    

3023           +1             O4             1000           1.45714e+06    2.55955e-02    0.00000e+00    

3024           +1             O4             1000           1.51429e+06    2.55955e-02    0.00000e+00    

3025           +1             O4             1000           1.57143e+06    2.55955e-02    0.00000e+00    

3026           +1             O4             1000           1.62857e+06    2.55955e-02    0.00000e+00    

3027           +1             O4             1000           1.68571e+06    2.55955e-02    8.00000e-01    

3028           +1             O4             1000           1.74286e+06    2.55955e-02    8.00000e-01    

3029           +1             O4             1000           1.80000e+06    2.55955e-02    1.30000e+00    

302            +1             O1             1000           2.57143e+05    1.75751e-02    0.00000e+00    

3030           +1             O4             1000           1.85714e+06    2.55955e-02    3.60000e+00    

3031           +1             O4             1000           1.91429e+06    2.55955e-02    5.10000e+00    

3032           +1             O4             1000           1.97143e+06    2.55955e-02    6.50000e+00    

3033           +1             O4             1000           2.02857e+06    2.55955e-02    1.08000e+01    

3034           +1             O4             1000           2.08571e+06    2.55955e-02    1.19000e+01    

3035           +1             O4             1000           2.14286e+06    2.55955e-02    1.57000e+01    

3036           +1             O4             1000           2.20000e+06    2.55955e-02    1.98000e+01    

3037           +1             O4             1000           2.25714e+06    2.55955e-02    2.21000e+01    

3038           +1             O4             1000           2.31429e+06    2.55955e-02    2.54000e+01    

3039           +1             O4             1000           2.37143e+06    2.55955e-02    2.99000e+01    

303            +1             O1             1000           3.14286e+05    1.75751e-02    0.00000e+00    

3040           +1             O4             1000           2.42857e+06    2.55955e-02    3.40000e+01    

3041           +1             O4             1000           2.48571e+06    2.55955e-02    3.61000e+01    

3042           +1             O4             1000           2.54286e+06    2.55955e-02    4.06000e+01    

3043           +1             O4             1000           2.60000e+06    2.55955e-02    3.96000e+01    

3044           +1             O4             1000           2.65714e+06    2.55955e-02    4.49000e+01    

3045           +1             O4             1000           2.71429e+06    2.55955e-02    4.57000e+01    

3046           +1             O4             1000           2.77143e+06    2.55955e-02    5.19000e+01    

3047           +1             O4             1000           2.82857e+06    2.55955e-02    5.33000e+01    

3048           +1             O4             1000           2.88571e+06    2.55955e-02    5.61000e+01    

3049           +1             O4             1000           2.94286e+06    2.55955e-02    6.14000e+01    

304            +1             O1             1000           3.71429e+05    1.75751e-02    0.00000e+00    

3050           +1             O4             1000           3.00000e+06    2.55955e-02    6.14000e+01    

3051           +1             O4             1000           2.00000e+05    2.81177e-02    0.00000e+00    

3052           +1             O4             1000           2.57143e+05    2.81177e-02    0.00000e+00    

3053           +1             O4             1000           3.14286e+05    2.81177e-02    0.00000e+00    

3054           +1             O4             1000           3.71429e+05    2.81177e-02    0.00000e+00    

3055           +1             O4             1000           4.28571e+05    2.81177e-02    0.00000e+00    

3056           +1             O4             1000           4.85714e+05    2.81177e-02    0.00000e+00    

3057           +1             O4             1000           5.42857e+05    2.81177e-02    0.00000e+00    

3058           +1             O4             1000           6.00000e+05    2.81177e-02    0.00000e+00    

3059           +1             O4             1000           6.57143e+05    2.81177e-02    0.00000e+00    

305            +1             O1             1000           4.28571e+05    1.75751e-02    0.00000e+00    

3060           +1             O4             1000           7.14286e+05    2.81177e-02    0.00000e+00    

3061           +1             O4             1000           7.71429e+05    2.81177e-02    0.00000e+00    

3062           +1             O4             1000           8.28571e+05    2.81177e-02    0.00000e+00    

3063           +1             O4             1000           8.85714e+05    2.81177e-02    0.00000e+00    

3064           +1             O4             1000           9.42857e+05    2.81177e-02    0.00000e+00    

3065           +1             O4             1000           1.00000e+06    2.81177e-02    0.00000e+00    

3066           +1             O4             1000           1.05714e+06    2.81177e-02    0.00000e+00    

3067           +1             O4             1000           1.11429e+06    2.81177e-02    0.00000e+00    

3068           +1             O4             1000           1.17143e+06    2.81177e-02    0.00000e+00    

3069           +1             O4             1000           1.22857e+06    2.81177e-02    0.00000e+00    

306            +1             O1             1000           4.85714e+05    1.75751e-02    0.00000e+00    

3070           +1             O4             1000           1.28571e+06    2.81177e-02    0.00000e+00    

3071           +1             O4             1000           1.34286e+06    2.81177e-02    0.00000e+00    

3072           +1             O4             1000           1.40000e+06    2.81177e-02    0.00000e+00    

3073           +1             O4             1000           1.45714e+06    2.81177e-02    1.00000e-01    

3074           +1             O4             1000           1.51429e+06    2.81177e-02    4.00000e-01    

3075           +1             O4             1000           1.57143e+06    2.81177e-02    5.00000e-01    

3076           +1             O4             1000           1.62857e+06    2.81177e-02    1.30000e+00    

3077           +1             O4             1000           1.68571e+06    2.81177e-02    2.30000e+00    

3078           +1             O4             1000           1.74286e+06    2.81177e-02    4.10000e+00    

3079           +1             O4             1000           1.80000e+06    2.81177e-02    6.50000e+00    

307            +1             O1             1000           5.42857e+05    1.75751e-02    0.00000e+00    

3080           +1             O4             1000           1.85714e+06    2.81177e-02    8.40000e+00    

3081           +1             O4             1000           1.91429e+06    2.81177e-02    1.10000e+01    

3082           +1             O4             1000           1.97143e+06    2.81177e-02    1.40000e+01    

3083           +1             O4             1000           2.02857e+06    2.81177e-02    1.80000e+01    

3084           +1             O4             1000           2.08571e+06    2.81177e-02    1.87000e+01    

3085           +1             O4             1000           2.14286e+06    2.81177e-02    2.52000e+01    

3086           +1             O4             1000           2.20000e+06    2.81177e-02    2.85000e+01    

3087           +1             O4             1000           2.25714e+06    2.81177e-02    2.95000e+01    

3088           +1             O4             1000           2.31429e+06    2.81177e-02    3.59000e+01    

3089           +1             O4             1000           2.37143e+06    2.81177e-02    3.79000e+01    

308            +1             O1             1000           6.00000e+05    1.75751e-02    0.00000e+00    

3090           +1             O4             1000           2.42857e+06    2.81177e-02    4.33000e+01    

3091           +1             O4             1000           2.48571e+06    2.81177e-02    4.70000e+01    

3092           +1             O4             1000           2.54286e+06    2.81177e-02    5.05000e+01    

3093           +1             O4             1000           2.60000e+06    2.81177e-02    5.30000e+01    

3094           +1             O4             1000           2.65714e+06    2.81177e-02    5.51000e+01    

3095           +1             O4             1000           2.71429e+06    2.81177e-02    5.82000e+01    

3096           +1             O4             1000           2.77143e+06    2.81177e-02    6.11000e+01    

3097           +1             O4             1000           2.82857e+06    2.81177e-02    6.10000e+01    

3098           +1             O4             1000           2.88571e+06    2.81177e-02    6.56000e+01    

3099           +1             O4             1000           2.94286e+06    2.81177e-02    7.03000e+01    

309            +1             O1             1000           6.57143e+05    1.75751e-02    0.00000e+00    

30             +1             O1             1000           1.85714e+06    1.00000e-02    0.00000e+00    

3100           +1             O4             1000           3.00000e+06    2.81177e-02    6.76000e+01    

3101           +1             O4             1000           2.00000e+05    3.08884e-02    0.00000e+00    

3102           +1             O4             1000           2.57143e+05    3.08884e-02    0.00000e+00    

3103           +1             O4             1000           3.14286e+05    3.08884e-02    0.00000e+00    

3104           +1             O4             1000           3.71429e+05    3.08884e-02    0.00000e+00    

3105           +1             O4             1000           4.28571e+05    3.08884e-02    0.00000e+00    

3106           +1             O4             1000           4.85714e+05    3.08884e-02    0.00000e+00    

3107           +1             O4             1000           5.42857e+05    3.08884e-02    0.00000e+00    

3108           +1             O4             1000           6.00000e+05    3.08884e-02    0.00000e+00    

3109           +1             O4             1000           6.57143e+05    3.08884e-02    0.00000e+00    

310            +1             O1             1000           7.14286e+05    1.75751e-02    0.00000e+00    

3110           +1             O4             1000           7.14286e+05    3.08884e-02    0.00000e+00    

3111           +1             O4             1000           7.71429e+05    3.08884e-02    0.00000e+00    

3112           +1             O4             1000           8.28571e+05    3.08884e-02    0.00000e+00    

3113           +1             O4             1000           8.85714e+05    3.08884e-02    0.00000e+00    

3114           +1             O4             1000           9.42857e+05    3.08884e-02    0.00000e+00    

3115           +1             O4             1000           1.00000e+06    3.08884e-02    0.00000e+00    

3116           +1             O4             1000           1.05714e+06    3.08884e-02    0.00000e+00    

3117           +1             O4             1000           1.11429e+06    3.08884e-02    0.00000e+00    

3118           +1             O4             1000           1.17143e+06    3.08884e-02    0.00000e+00    

3119           +1             O4             1000           1.22857e+06    3.08884e-02    0.00000e+00    

311            +1             O1             1000           7.71429e+05    1.75751e-02    0.00000e+00    

3120           +1             O4             1000           1.28571e+06    3.08884e-02    1.00000e-01    

3121           +1             O4             1000           1.34286e+06    3.08884e-02    1.00000e-01    

3122           +1             O4             1000           1.40000e+06    3.08884e-02    5.00000e-01    

3123           +1             O4             1000           1.45714e+06    3.08884e-02    9.00000e-01    

3124           +1             O4             1000           1.51429e+06    3.08884e-02    9.00000e-01    

3125           +1             O4             1000           1.57143e+06    3.08884e-02    2.70000e+00    

3126           +1             O4             1000           1.62857e+06    3.08884e-02    3.40000e+00    

3127           +1             O4             1000           1.68571e+06    3.08884e-02    6.20000e+00    

3128           +1             O4             1000           1.74286e+06    3.08884e-02    8.40000e+00    

3129           +1             O4             1000           1.80000e+06    3.08884e-02    1.25000e+01    

312            +1             O1             1000           8.28571e+05    1.75751e-02    0.00000e+00    

3130           +1             O4             1000           1.85714e+06    3.08884e-02    1.43000e+01    

3131           +1             O4             1000           1.91429e+06    3.08884e-02    1.90000e+01    

3132           +1             O4             1000           1.97143e+06    3.08884e-02    2.31000e+01    

3133           +1             O4             1000           2.02857e+06    3.08884e-02    2.89000e+01    

3134           +1             O4             1000           2.08571e+06    3.08884e-02    3.17000e+01    

3135           +1             O4             1000           2.14286e+06    3.08884e-02    3.50000e+01    

3136           +1             O4             1000           2.20000e+06    3.08884e-02    4.00000e+01    

3137           +1             O4             1000           2.25714e+06    3.08884e-02    4.39000e+01    

3138           +1             O4             1000           2.31429e+06    3.08884e-02    4.47000e+01    

3139           +1             O4             1000           2.37143e+06    3.08884e-02    5.15000e+01    

313            +1             O1             1000           8.85714e+05    1.75751e-02    0.00000e+00    

3140           +1             O4             1000           2.42857e+06    3.08884e-02    5.64000e+01    

3141           +1             O4             1000           2.48571e+06    3.08884e-02    5.76000e+01    

3142           +1             O4             1000           2.54286e+06    3.08884e-02    6.00000e+01    

3143           +1             O4             1000           2.60000e+06    3.08884e-02    6.23000e+01    

3144           +1             O4             1000           2.65714e+06    3.08884e-02    6.35000e+01    

3145           +1             O4             1000           2.71429e+06    3.08884e-02    6.84000e+01    

3146           +1             O4             1000           2.77143e+06    3.08884e-02    6.98000e+01    

3147           +1             O4             1000           2.82857e+06    3.08884e-02    7.05000e+01    

3148           +1             O4             1000           2.88571e+06    3.08884e-02    7.00000e+01    

3149           +1             O4             1000           2.94286e+06    3.08884e-02    7.50000e+01    

314            +1             O1             1000           9.42857e+05    1.75751e-02    0.00000e+00    

3150           +1             O4             1000           3.00000e+06    3.08884e-02    7.41000e+01    

3151           +1             O4             1000           2.00000e+05    3.39322e-02    0.00000e+00    

3152           +1             O4             1000           2.57143e+05    3.39322e-02    0.00000e+00    

3153           +1             O4             1000           3.14286e+05    3.39322e-02    0.00000e+00    

3154           +1             O4             1000           3.71429e+05    3.39322e-02    0.00000e+00    

3155           +1             O4             1000           4.28571e+05    3.39322e-02    0.00000e+00    

3156           +1             O4             1000           4.85714e+05    3.39322e-02    0.00000e+00    

3157           +1             O4             1000           5.42857e+05    3.39322e-02    0.00000e+00    

3158           +1             O4             1000           6.00000e+05    3.39322e-02    0.00000e+00    

3159           +1             O4             1000           6.57143e+05    3.39322e-02    0.00000e+00    

315            +1             O1             1000           1.00000e+06    1.75751e-02    0.00000e+00    

3160           +1             O4             1000           7.14286e+05    3.39322e-02    0.00000e+00    

3161           +1             O4             1000           7.71429e+05    3.39322e-02    0.00000e+00    

3162           +1             O4             1000           8.28571e+05    3.39322e-02    0.00000e+00    

3163           +1             O4             1000           8.85714e+05    3.39322e-02    0.00000e+00    

3164           +1             O4             1000           9.42857e+05    3.39322e-02    0.00000e+00    

3165           +1             O4             1000           1.00000e+06    3.39322e-02    0.00000e+00    

3166           +1             O4             1000           1.05714e+06    3.39322e-02    0.00000e+00    

3167           +1             O4             1000           1.11429e+06    3.39322e-02    0.00000e+00    

3168           +1             O4             1000           1.17143e+06    3.39322e-02    0.00000e+00    

3169           +1             O4             1000           1.22857e+06    3.39322e-02    0.00000e+00    

316            +1             O1             1000           1.05714e+06    1.75751e-02    0.00000e+00    

3170           +1             O4             1000           1.28571e+06    3.39322e-02    3.00000e-01    

3171           +1             O4             1000           1.34286e+06    3.39322e-02    5.00000e-01    

3172           +1             O4             1000           1.40000e+06    3.39322e-02    1.20000e+00    

3173           +1             O4             1000           1.45714e+06    3.39322e-02    1.90000e+00    

3174           +1             O4             1000           1.51429e+06    3.39322e-02    3.60000e+00    

3175           +1             O4             1000           1.57143e+06    3.39322e-02    7.10000e+00    

3176           +1             O4             1000           1.62857e+06    3.39322e-02    9.20000e+00    

3177           +1             O4             1000           1.68571e+06    3.39322e-02    1.20000e+01    

3178           +1             O4             1000           1.74286e+06    3.39322e-02    1.72000e+01    

3179           +1             O4             1000           1.80000e+06    3.39322e-02    2.08000e+01    

317            +1             O1             1000           1.11429e+06    1.75751e-02    0.00000e+00    

3180           +1             O4             1000           1.85714e+06    3.39322e-02    2.57000e+01    

3181           +1             O4             1000           1.91429e+06    3.39322e-02    3.09000e+01    

3182           +1             O4             1000           1.97143e+06    3.39322e-02    3.40000e+01    

3183           +1             O4             1000           2.02857e+06    3.39322e-02    3.68000e+01    

3184           +1             O4             1000           2.08571e+06    3.39322e-02    4.01000e+01    

3185           +1             O4             1000           2.14286e+06    3.39322e-02    4.52000e+01    

3186           +1             O4             1000           2.20000e+06    3.39322e-02    5.18000e+01    

3187           +1             O4             1000           2.25714e+06    3.39322e-02    5.28000e+01    

3188           +1             O4             1000           2.31429e+06    3.39322e-02    5.58000e+01    

3189           +1             O4             1000           2.37143e+06    3.39322e-02    6.14000e+01    

318            +1             O1             1000           1.17143e+06    1.75751e-02    0.00000e+00    

3190           +1             O4             1000           2.42857e+06    3.39322e-02    6.55000e+01    

3191           +1             O4             1000           2.48571e+06    3.39322e-02    6.46000e+01    

3192           +1             O4             1000           2.54286e+06    3.39322e-02    6.77000e+01    

3193           +1             O4             1000           2.60000e+06    3.39322e-02    7.11000e+01    

3194           +1             O4             1000           2.65714e+06    3.39322e-02    7.41000e+01    

3195           +1             O4             1000           2.71429e+06    3.39322e-02    7.43000e+01    

3196           +1             O4             1000           2.77143e+06    3.39322e-02    7.64000e+01    

3197           +1             O4             1000           2.82857e+06    3.39322e-02    7.69000e+01    

3198           +1             O4             1000           2.88571e+06    3.39322e-02    8.01000e+01    

3199           +1             O4             1000           2.94286e+06    3.39322e-02    8.09000e+01    

319            +1             O1             1000           1.22857e+06    1.75751e-02    0.00000e+00    

31             +1             O1             1000           1.91429e+06    1.00000e-02    0.00000e+00    

3200           +1             O4             1000           3.00000e+06    3.39322e-02    8.31000e+01    

3201           +1             O4             1000           2.00000e+05    3.72759e-02    0.00000e+00    

3202           +1             O4             1000           2.57143e+05    3.72759e-02    0.00000e+00    

3203           +1             O4             1000           3.14286e+05    3.72759e-02    0.00000e+00    

3204           +1             O4             1000           3.71429e+05    3.72759e-02    0.00000e+00    

3205           +1             O4             1000           4.28571e+05    3.72759e-02    0.00000e+00    

3206           +1             O4             1000           4.85714e+05    3.72759e-02    0.00000e+00    

3207           +1             O4             1000           5.42857e+05    3.72759e-02    0.00000e+00    

3208           +1             O4             1000           6.00000e+05    3.72759e-02    0.00000e+00    

3209           +1             O4             1000           6.57143e+05    3.72759e-02    0.00000e+00    

320            +1             O1             1000           1.28571e+06    1.75751e-02    0.00000e+00    

3210           +1             O4             1000           7.14286e+05    3.72759e-02    0.00000e+00    

3211           +1             O4             1000           7.71429e+05    3.72759e-02    0.00000e+00    

3212           +1             O4             1000           8.28571e+05    3.72759e-02    0.00000e+00    

3213           +1             O4             1000           8.85714e+05    3.72759e-02    0.00000e+00    

3214           +1             O4             1000           9.42857e+05    3.72759e-02    0.00000e+00    

3215           +1             O4             1000           1.00000e+06    3.72759e-02    0.00000e+00    

3216           +1             O4             1000           1.05714e+06    3.72759e-02    0.00000e+00    

3217           +1             O4             1000           1.11429e+06    3.72759e-02    0.00000e+00    

3218           +1             O4             1000           1.17143e+06    3.72759e-02    2.00000e-01    

3219           +1             O4             1000           1.22857e+06    3.72759e-02    0.00000e+00    

321            +1             O1             1000           1.34286e+06    1.75751e-02    0.00000e+00    

3220           +1             O4             1000           1.28571e+06    3.72759e-02    8.00000e-01    

3221           +1             O4             1000           1.34286e+06    3.72759e-02    1.20000e+00    

3222           +1             O4             1000           1.40000e+06    3.72759e-02    3.60000e+00    

3223           +1             O4             1000           1.45714e+06    3.72759e-02    6.40000e+00    

3224           +1             O4             1000           1.51429e+06    3.72759e-02    8.90000e+00    

3225           +1             O4             1000           1.57143e+06    3.72759e-02    1.31000e+01    

3226           +1             O4             1000           1.62857e+06    3.72759e-02    1.88000e+01    

3227           +1             O4             1000           1.68571e+06    3.72759e-02    2.12000e+01    

3228           +1             O4             1000           1.74286e+06    3.72759e-02    2.73000e+01    

3229           +1             O4             1000           1.80000e+06    3.72759e-02    3.11000e+01    

322            +1             O1             1000           1.40000e+06    1.75751e-02    0.00000e+00    

3230           +1             O4             1000           1.85714e+06    3.72759e-02    3.68000e+01    

3231           +1             O4             1000           1.91429e+06    3.72759e-02    4.08000e+01    

3232           +1             O4             1000           1.97143e+06    3.72759e-02    4.50000e+01    

3233           +1             O4             1000           2.02857e+06    3.72759e-02    4.58000e+01    

3234           +1             O4             1000           2.08571e+06    3.72759e-02    5.21000e+01    

3235           +1             O4             1000           2.14286e+06    3.72759e-02    5.56000e+01    

3236           +1             O4             1000           2.20000e+06    3.72759e-02    6.17000e+01    

3237           +1             O4             1000           2.25714e+06    3.72759e-02    6.51000e+01    

3238           +1             O4             1000           2.31429e+06    3.72759e-02    6.89000e+01    

3239           +1             O4             1000           2.37143e+06    3.72759e-02    6.65000e+01    

323            +1             O1             1000           1.45714e+06    1.75751e-02    0.00000e+00    

3240           +1             O4             1000           2.42857e+06    3.72759e-02    7.04000e+01    

3241           +1             O4             1000           2.48571e+06    3.72759e-02    7.39000e+01    

3242           +1             O4             1000           2.54286e+06    3.72759e-02    7.79000e+01    

3243           +1             O4             1000           2.60000e+06    3.72759e-02    7.87000e+01    

3244           +1             O4             1000           2.65714e+06    3.72759e-02    7.96000e+01    

3245           +1             O4             1000           2.71429e+06    3.72759e-02    7.93000e+01    

3246           +1             O4             1000           2.77143e+06    3.72759e-02    8.25000e+01    

3247           +1             O4             1000           2.82857e+06    3.72759e-02    8.33000e+01    

3248           +1             O4             1000           2.88571e+06    3.72759e-02    8.63000e+01    

3249           +1             O4             1000           2.94286e+06    3.72759e-02    8.44000e+01    

324            +1             O1             1000           1.51429e+06    1.75751e-02    0.00000e+00    

3250           +1             O4             1000           3.00000e+06    3.72759e-02    8.55000e+01    

3251           +1             O4             1000           2.00000e+05    4.09492e-02    0.00000e+00    

3252           +1             O4             1000           2.57143e+05    4.09492e-02    0.00000e+00    

3253           +1             O4             1000           3.14286e+05    4.09492e-02    0.00000e+00    

3254           +1             O4             1000           3.71429e+05    4.09492e-02    0.00000e+00    

3255           +1             O4             1000           4.28571e+05    4.09492e-02    0.00000e+00    

3256           +1             O4             1000           4.85714e+05    4.09492e-02    0.00000e+00    

3257           +1             O4             1000           5.42857e+05    4.09492e-02    0.00000e+00    

3258           +1             O4             1000           6.00000e+05    4.09492e-02    0.00000e+00    

3259           +1             O4             1000           6.57143e+05    4.09492e-02    0.00000e+00    

325            +1             O1             1000           1.57143e+06    1.75751e-02    0.00000e+00    

3260           +1             O4             1000           7.14286e+05    4.09492e-02    0.00000e+00    

3261           +1             O4             1000           7.71429e+05    4.09492e-02    0.00000e+00    

3262           +1             O4             1000           8.28571e+05    4.09492e-02    0.00000e+00    

3263           +1             O4             1000           8.85714e+05    4.09492e-02    0.00000e+00    

3264           +1             O4             1000           9.42857e+05    4.09492e-02    0.00000e+00    

3265           +1             O4             1000           1.00000e+06    4.09492e-02    0.00000e+00    

3266           +1             O4             1000           1.05714e+06    4.09492e-02    0.00000e+00    

3267           +1             O4             1000           1.11429e+06    4.09492e-02    2.00000e-01    

3268           +1             O4             1000           1.17143e+06    4.09492e-02    2.00000e-01    

3269           +1             O4             1000           1.22857e+06    4.09492e-02    1.70000e+00    

326            +1             O1             1000           1.62857e+06    1.75751e-02    0.00000e+00    

3270           +1             O4             1000           1.28571e+06    4.09492e-02    2.90000e+00    

3271           +1             O4             1000           1.34286e+06    4.09492e-02    3.80000e+00    

3272           +1             O4             1000           1.40000e+06    4.09492e-02    9.00000e+00    

3273           +1             O4             1000           1.45714e+06    4.09492e-02    1.56000e+01    

3274           +1             O4             1000           1.51429e+06    4.09492e-02    1.49000e+01    

3275           +1             O4             1000           1.57143e+06    4.09492e-02    2.09000e+01    

3276           +1             O4             1000           1.62857e+06    4.09492e-02    2.84000e+01    

3277           +1             O4             1000           1.68571e+06    4.09492e-02    3.36000e+01    

3278           +1             O4             1000           1.74286e+06    4.09492e-02    3.96000e+01    

3279           +1             O4             1000           1.80000e+06    4.09492e-02    4.47000e+01    

327            +1             O1             1000           1.68571e+06    1.75751e-02    0.00000e+00    

3280           +1             O4             1000           1.85714e+06    4.09492e-02    4.92000e+01    

3281           +1             O4             1000           1.91429e+06    4.09492e-02    5.13000e+01    

3282           +1             O4             1000           1.97143e+06    4.09492e-02    5.57000e+01    

3283           +1             O4             1000           2.02857e+06    4.09492e-02    6.04000e+01    

3284           +1             O4             1000           2.08571e+06    4.09492e-02    6.27000e+01    

3285           +1             O4             1000           2.14286e+06    4.09492e-02    6.64000e+01    

3286           +1             O4             1000           2.20000e+06    4.09492e-02    6.81000e+01    

3287           +1             O4             1000           2.25714e+06    4.09492e-02    7.43000e+01    

3288           +1             O4             1000           2.31429e+06    4.09492e-02    7.23000e+01    

3289           +1             O4             1000           2.37143e+06    4.09492e-02    7.71000e+01    

328            +1             O1             1000           1.74286e+06    1.75751e-02    0.00000e+00    

3290           +1             O4             1000           2.42857e+06    4.09492e-02    7.85000e+01    

3291           +1             O4             1000           2.48571e+06    4.09492e-02    8.05000e+01    

3292           +1             O4             1000           2.54286e+06    4.09492e-02    8.31000e+01    

3293           +1             O4             1000           2.60000e+06    4.09492e-02    8.37000e+01    

3294           +1             O4             1000           2.65714e+06    4.09492e-02    8.42000e+01    

3295           +1             O4             1000           2.71429e+06    4.09492e-02    8.45000e+01    

3296           +1             O4             1000           2.77143e+06    4.09492e-02    8.70000e+01    

3297           +1             O4             1000           2.82857e+06    4.09492e-02    8.69000e+01    

3298           +1             O4             1000           2.88571e+06    4.09492e-02    8.73000e+01    

3299           +1             O4             1000           2.94286e+06    4.09492e-02    9.11000e+01    

329            +1             O1             1000           1.80000e+06    1.75751e-02    0.00000e+00    

32             +1             O1             1000           1.97143e+06    1.00000e-02    0.00000e+00    

3300           +1             O4             1000           3.00000e+06    4.09492e-02    8.91000e+01    

3301           +1             O4             1000           2.00000e+05    4.49843e-02    0.00000e+00    

3302           +1             O4             1000           2.57143e+05    4.49843e-02    0.00000e+00    

3303           +1             O4             1000           3.14286e+05    4.49843e-02    0.00000e+00    

3304           +1             O4             1000           3.71429e+05    4.49843e-02    0.00000e+00    

3305           +1             O4             1000           4.28571e+05    4.49843e-02    0.00000e+00    

3306           +1             O4             1000           4.85714e+05    4.49843e-02    0.00000e+00    

3307           +1             O4             1000           5.42857e+05    4.49843e-02    0.00000e+00    

3308           +1             O4             1000           6.00000e+05    4.49843e-02    0.00000e+00    

3309           +1             O4             1000           6.57143e+05    4.49843e-02    0.00000e+00    

330            +1             O1             1000           1.85714e+06    1.75751e-02    0.00000e+00    

3310           +1             O4             1000           7.14286e+05    4.49843e-02    0.00000e+00    

3311           +1             O4             1000           7.71429e+05    4.49843e-02    0.00000e+00    

3312           +1             O4             1000           8.28571e+05    4.49843e-02    0.00000e+00    

3313           +1             O4             1000           8.85714e+05    4.49843e-02    0.00000e+00    

3314           +1             O4             1000           9.42857e+05    4.49843e-02    0.00000e+00    

3315           +1             O4             1000           1.00000e+06    4.49843e-02    0.00000e+00    

3316           +1             O4             1000           1.05714e+06    4.49843e-02    3.00000e-01    

3317           +1             O4             1000           1.11429e+06    4.49843e-02    7.00000e-01    

3318           +1             O4             1000           1.17143e+06    4.49843e-02    2.10000e+00    

3319           +1             O4             1000           1.22857e+06    4.49843e-02    4.60000e+00    

331            +1             O1             1000           1.91429e+06    1.75751e-02    0.00000e+00    

3320           +1             O4             1000           1.28571e+06    4.49843e-02    7.70000e+00    

3321           +1             O4             1000           1.34286e+06    4.49843e-02    1.18000e+01    

3322           +1             O4             1000           1.40000e+06    4.49843e-02    1.67000e+01    

3323           +1             O4             1000           1.45714e+06    4.49843e-02    2.35000e+01    

3324           +1             O4             1000           1.51429e+06    4.49843e-02    2.79000e+01    

3325           +1             O4             1000           1.57143e+06    4.49843e-02    3.39000e+01    

3326           +1             O4             1000           1.62857e+06    4.49843e-02    3.82000e+01    

3327           +1             O4             1000           1.68571e+06    4.49843e-02    4.89000e+01    

3328           +1             O4             1000           1.74286e+06    4.49843e-02    5.06000e+01    

3329           +1             O4             1000           1.80000e+06    4.49843e-02    5.33000e+01    

332            +1             O1             1000           1.97143e+06    1.75751e-02    0.00000e+00    

3330           +1             O4             1000           1.85714e+06    4.49843e-02    5.81000e+01    

3331           +1             O4             1000           1.91429e+06    4.49843e-02    6.44000e+01    

3332           +1             O4             1000           1.97143e+06    4.49843e-02    6.50000e+01    

3333           +1             O4             1000           2.02857e+06    4.49843e-02    6.97000e+01    

3334           +1             O4             1000           2.08571e+06    4.49843e-02    6.96000e+01    

3335           +1             O4             1000           2.14286e+06    4.49843e-02    7.47000e+01    

3336           +1             O4             1000           2.20000e+06    4.49843e-02    7.41000e+01    

3337           +1             O4             1000           2.25714e+06    4.49843e-02    7.94000e+01    

3338           +1             O4             1000           2.31429e+06    4.49843e-02    8.06000e+01    

3339           +1             O4             1000           2.37143e+06    4.49843e-02    8.27000e+01    

333            +1             O1             1000           2.02857e+06    1.75751e-02    0.00000e+00    

3340           +1             O4             1000           2.42857e+06    4.49843e-02    8.23000e+01    

3341           +1             O4             1000           2.48571e+06    4.49843e-02    8.43000e+01    

3342           +1             O4             1000           2.54286e+06    4.49843e-02    8.42000e+01    

3343           +1             O4             1000           2.60000e+06    4.49843e-02    8.78000e+01    

3344           +1             O4             1000           2.65714e+06    4.49843e-02    8.75000e+01    

3345           +1             O4             1000           2.71429e+06    4.49843e-02    8.88000e+01    

3346           +1             O4             1000           2.77143e+06    4.49843e-02    8.93000e+01    

3347           +1             O4             1000           2.82857e+06    4.49843e-02    9.13000e+01    

3348           +1             O4             1000           2.88571e+06    4.49843e-02    8.99000e+01    

3349           +1             O4             1000           2.94286e+06    4.49843e-02    9.26000e+01    

334            +1             O1             1000           2.08571e+06    1.75751e-02    0.00000e+00    

3350           +1             O4             1000           3.00000e+06    4.49843e-02    9.16000e+01    

3351           +1             O4             1000           2.00000e+05    4.94171e-02    0.00000e+00    

3352           +1             O4             1000           2.57143e+05    4.94171e-02    0.00000e+00    

3353           +1             O4             1000           3.14286e+05    4.94171e-02    0.00000e+00    

3354           +1             O4             1000           3.71429e+05    4.94171e-02    0.00000e+00    

3355           +1             O4             1000           4.28571e+05    4.94171e-02    0.00000e+00    

3356           +1             O4             1000           4.85714e+05    4.94171e-02    0.00000e+00    

3357           +1             O4             1000           5.42857e+05    4.94171e-02    0.00000e+00    

3358           +1             O4             1000           6.00000e+05    4.94171e-02    0.00000e+00    

3359           +1             O4             1000           6.57143e+05    4.94171e-02    0.00000e+00    

335            +1             O1             1000           2.14286e+06    1.75751e-02    0.00000e+00    

3360           +1             O4             1000           7.14286e+05    4.94171e-02    0.00000e+00    

3361           +1             O4             1000           7.71429e+05    4.94171e-02    0.00000e+00    

3362           +1             O4             1000           8.28571e+05    4.94171e-02    0.00000e+00    

3363           +1             O4             1000           8.85714e+05    4.94171e-02    0.00000e+00    

3364           +1             O4             1000           9.42857e+05    4.94171e-02    1.00000e-01    

3365           +1             O4             1000           1.00000e+06    4.94171e-02    5.00000e-01    

3366           +1             O4             1000           1.05714e+06    4.94171e-02    1.40000e+00    

3367           +1             O4             1000           1.11429e+06    4.94171e-02    2.30000e+00    

3368           +1             O4             1000           1.17143e+06    4.94171e-02    5.10000e+00    

3369           +1             O4             1000           1.22857e+06    4.94171e-02    1.25000e+01    

336            +1             O1             1000           2.20000e+06    1.75751e-02    0.00000e+00    

3370           +1             O4             1000           1.28571e+06    4.94171e-02    1.61000e+01    

3371           +1             O4             1000           1.34286e+06    4.94171e-02    2.29000e+01    

3372           +1             O4             1000           1.40000e+06    4.94171e-02    3.13000e+01    

3373           +1             O4             1000           1.45714e+06    4.94171e-02    3.12000e+01    

3374           +1             O4             1000           1.51429e+06    4.94171e-02    3.90000e+01    

3375           +1             O4             1000           1.57143e+06    4.94171e-02    4.46000e+01    

3376           +1             O4             1000           1.62857e+06    4.94171e-02    5.22000e+01    

3377           +1             O4             1000           1.68571e+06    4.94171e-02    5.53000e+01    

3378           +1             O4             1000           1.74286e+06    4.94171e-02    6.14000e+01    

3379           +1             O4             1000           1.80000e+06    4.94171e-02    6.50000e+01    

337            +1             O1             1000           2.25714e+06    1.75751e-02    0.00000e+00    

3380           +1             O4             1000           1.85714e+06    4.94171e-02    6.67000e+01    

3381           +1             O4             1000           1.91429e+06    4.94171e-02    7.05000e+01    

3382           +1             O4             1000           1.97143e+06    4.94171e-02    7.50000e+01    

3383           +1             O4             1000           2.02857e+06    4.94171e-02    7.51000e+01    

3384           +1             O4             1000           2.08571e+06    4.94171e-02    7.94000e+01    

3385           +1             O4             1000           2.14286e+06    4.94171e-02    8.21000e+01    

3386           +1             O4             1000           2.20000e+06    4.94171e-02    8.20000e+01    

3387           +1             O4             1000           2.25714e+06    4.94171e-02    8.41000e+01    

3388           +1             O4             1000           2.31429e+06    4.94171e-02    8.59000e+01    

3389           +1             O4             1000           2.37143e+06    4.94171e-02    8.72000e+01    

338            +1             O1             1000           2.31429e+06    1.75751e-02    0.00000e+00    

3390           +1             O4             1000           2.42857e+06    4.94171e-02    8.54000e+01    

3391           +1             O4             1000           2.48571e+06    4.94171e-02    8.83000e+01    

3392           +1             O4             1000           2.54286e+06    4.94171e-02    8.90000e+01    

3393           +1             O4             1000           2.60000e+06    4.94171e-02    8.98000e+01    

3394           +1             O4             1000           2.65714e+06    4.94171e-02    9.08000e+01    

3395           +1             O4             1000           2.71429e+06    4.94171e-02    9.12000e+01    

3396           +1             O4             1000           2.77143e+06    4.94171e-02    9.25000e+01    

3397           +1             O4             1000           2.82857e+06    4.94171e-02    9.38000e+01    

3398           +1             O4             1000           2.88571e+06    4.94171e-02    9.35000e+01    

3399           +1             O4             1000           2.94286e+06    4.94171e-02    9.30000e+01    

339            +1             O1             1000           2.37143e+06    1.75751e-02    0.00000e+00    

33             +1             O1             1000           2.02857e+06    1.00000e-02    0.00000e+00    

3400           +1             O4             1000           3.00000e+06    4.94171e-02    9.53000e+01    

3401           +1             O4             1000           2.00000e+05    5.42868e-02    0.00000e+00    

3402           +1             O4             1000           2.57143e+05    5.42868e-02    0.00000e+00    

3403           +1             O4             1000           3.14286e+05    5.42868e-02    0.00000e+00    

3404           +1             O4             1000           3.71429e+05    5.42868e-02    0.00000e+00    

3405           +1             O4             1000           4.28571e+05    5.42868e-02    0.00000e+00    

3406           +1             O4             1000           4.85714e+05    5.42868e-02    0.00000e+00    

3407           +1             O4             1000           5.42857e+05    5.42868e-02    0.00000e+00    

3408           +1             O4             1000           6.00000e+05    5.42868e-02    0.00000e+00    

3409           +1             O4             1000           6.57143e+05    5.42868e-02    0.00000e+00    

340            +1             O1             1000           2.42857e+06    1.75751e-02    0.00000e+00    

3410           +1             O4             1000           7.14286e+05    5.42868e-02    0.00000e+00    

3411           +1             O4             1000           7.71429e+05    5.42868e-02    0.00000e+00    

3412           +1             O4             1000           8.28571e+05    5.42868e-02    0.00000e+00    

3413           +1             O4             1000           8.85714e+05    5.42868e-02    0.00000e+00    

3414           +1             O4             1000           9.42857e+05    5.42868e-02    7.00000e-01    

3415           +1             O4             1000           1.00000e+06    5.42868e-02    2.60000e+00    

3416           +1             O4             1000           1.05714e+06    5.42868e-02    5.40000e+00    

3417           +1             O4             1000           1.11429e+06    5.42868e-02    7.80000e+00    

3418           +1             O4             1000           1.17143e+06    5.42868e-02    1.45000e+01    

3419           +1             O4             1000           1.22857e+06    5.42868e-02    1.85000e+01    

341            +1             O1             1000           2.48571e+06    1.75751e-02    0.00000e+00    

3420           +1             O4             1000           1.28571e+06    5.42868e-02    2.46000e+01    

3421           +1             O4             1000           1.34286e+06    5.42868e-02    3.39000e+01    

3422           +1             O4             1000           1.40000e+06    5.42868e-02    4.15000e+01    

3423           +1             O4             1000           1.45714e+06    5.42868e-02    4.65000e+01    

3424           +1             O4             1000           1.51429e+06    5.42868e-02    5.24000e+01    

3425           +1             O4             1000           1.57143e+06    5.42868e-02    5.81000e+01    

3426           +1             O4             1000           1.62857e+06    5.42868e-02    5.73000e+01    

3427           +1             O4             1000           1.68571e+06    5.42868e-02    6.60000e+01    

3428           +1             O4             1000           1.74286e+06    5.42868e-02    6.66000e+01    

3429           +1             O4             1000           1.80000e+06    5.42868e-02    7.20000e+01    

342            +1             O1             1000           2.54286e+06    1.75751e-02    0.00000e+00    

3430           +1             O4             1000           1.85714e+06    5.42868e-02    7.65000e+01    

3431           +1             O4             1000           1.91429e+06    5.42868e-02    7.85000e+01    

3432           +1             O4             1000           1.97143e+06    5.42868e-02    8.06000e+01    

3433           +1             O4             1000           2.02857e+06    5.42868e-02    8.32000e+01    

3434           +1             O4             1000           2.08571e+06    5.42868e-02    8.39000e+01    

3435           +1             O4             1000           2.14286e+06    5.42868e-02    8.56000e+01    

3436           +1             O4             1000           2.20000e+06    5.42868e-02    8.71000e+01    

3437           +1             O4             1000           2.25714e+06    5.42868e-02    8.96000e+01    

3438           +1             O4             1000           2.31429e+06    5.42868e-02    8.95000e+01    

3439           +1             O4             1000           2.37143e+06    5.42868e-02    9.09000e+01    

343            +1             O1             1000           2.60000e+06    1.75751e-02    0.00000e+00    

3440           +1             O4             1000           2.42857e+06    5.42868e-02    9.04000e+01    

3441           +1             O4             1000           2.48571e+06    5.42868e-02    9.22000e+01    

3442           +1             O4             1000           2.54286e+06    5.42868e-02    9.20000e+01    

3443           +1             O4             1000           2.60000e+06    5.42868e-02    9.26000e+01    

3444           +1             O4             1000           2.65714e+06    5.42868e-02    9.38000e+01    

3445           +1             O4             1000           2.71429e+06    5.42868e-02    9.50000e+01    

3446           +1             O4             1000           2.77143e+06    5.42868e-02    9.40000e+01    

3447           +1             O4             1000           2.82857e+06    5.42868e-02    9.55000e+01    

3448           +1             O4             1000           2.88571e+06    5.42868e-02    9.63000e+01    

3449           +1             O4             1000           2.94286e+06    5.42868e-02    9.60000e+01    

344            +1             O1             1000           2.65714e+06    1.75751e-02    0.00000e+00    

3450           +1             O4             1000           3.00000e+06    5.42868e-02    9.71000e+01    

3451           +1             O4             1000           2.00000e+05    5.96362e-02    0.00000e+00    

3452           +1             O4             1000           2.57143e+05    5.96362e-02    0.00000e+00    

3453           +1             O4             1000           3.14286e+05    5.96362e-02    0.00000e+00    

3454           +1             O4             1000           3.71429e+05    5.96362e-02    0.00000e+00    

3455           +1             O4             1000           4.28571e+05    5.96362e-02    0.00000e+00    

3456           +1             O4             1000           4.85714e+05    5.96362e-02    0.00000e+00    

3457           +1             O4             1000           5.42857e+05    5.96362e-02    0.00000e+00    

3458           +1             O4             1000           6.00000e+05    5.96362e-02    0.00000e+00    

3459           +1             O4             1000           6.57143e+05    5.96362e-02    0.00000e+00    

345            +1             O1             1000           2.71429e+06    1.75751e-02    0.00000e+00    

3460           +1             O4             1000           7.14286e+05    5.96362e-02    0.00000e+00    

3461           +1             O4             1000           7.71429e+05    5.96362e-02    0.00000e+00    

3462           +1             O4             1000           8.28571e+05    5.96362e-02    3.00000e-01    

3463           +1             O4             1000           8.85714e+05    5.96362e-02    6.00000e-01    

3464           +1             O4             1000           9.42857e+05    5.96362e-02    3.50000e+00    

3465           +1             O4             1000           1.00000e+06    5.96362e-02    6.50000e+00    

3466           +1             O4             1000           1.05714e+06    5.96362e-02    1.15000e+01    

3467           +1             O4             1000           1.11429e+06    5.96362e-02    1.75000e+01    

3468           +1             O4             1000           1.17143e+06    5.96362e-02    2.52000e+01    

3469           +1             O4             1000           1.22857e+06    5.96362e-02    3.35000e+01    

346            +1             O1             1000           2.77143e+06    1.75751e-02    0.00000e+00    

3470           +1             O4             1000           1.28571e+06    5.96362e-02    3.94000e+01    

3471           +1             O4             1000           1.34286e+06    5.96362e-02    4.60000e+01    

3472           +1             O4             1000           1.40000e+06    5.96362e-02    5.13000e+01    

3473           +1             O4             1000           1.45714e+06    5.96362e-02    5.95000e+01    

3474           +1             O4             1000           1.51429e+06    5.96362e-02    6.63000e+01    

3475           +1             O4             1000           1.57143e+06    5.96362e-02    6.93000e+01    

3476           +1             O4             1000           1.62857e+06    5.96362e-02    7.14000e+01    

3477           +1             O4             1000           1.68571e+06    5.96362e-02    7.39000e+01    

3478           +1             O4             1000           1.74286e+06    5.96362e-02    7.95000e+01    

3479           +1             O4             1000           1.80000e+06    5.96362e-02    7.94000e+01    

347            +1             O1             1000           2.82857e+06    1.75751e-02    0.00000e+00    

3480           +1             O4             1000           1.85714e+06    5.96362e-02    8.06000e+01    

3481           +1             O4             1000           1.91429e+06    5.96362e-02    8.51000e+01    

3482           +1             O4             1000           1.97143e+06    5.96362e-02    8.67000e+01    

3483           +1             O4             1000           2.02857e+06    5.96362e-02    8.63000e+01    

3484           +1             O4             1000           2.08571e+06    5.96362e-02    8.76000e+01    

3485           +1             O4             1000           2.14286e+06    5.96362e-02    9.02000e+01    

3486           +1             O4             1000           2.20000e+06    5.96362e-02    9.06000e+01    

3487           +1             O4             1000           2.25714e+06    5.96362e-02    9.16000e+01    

3488           +1             O4             1000           2.31429e+06    5.96362e-02    9.32000e+01    

3489           +1             O4             1000           2.37143e+06    5.96362e-02    9.37000e+01    

348            +1             O1             1000           2.88571e+06    1.75751e-02    0.00000e+00    

3490           +1             O4             1000           2.42857e+06    5.96362e-02    9.43000e+01    

3491           +1             O4             1000           2.48571e+06    5.96362e-02    9.51000e+01    

3492           +1             O4             1000           2.54286e+06    5.96362e-02    9.49000e+01    

3493           +1             O4             1000           2.60000e+06    5.96362e-02    9.55000e+01    

3494           +1             O4             1000           2.65714e+06    5.96362e-02    9.60000e+01    

3495           +1             O4             1000           2.71429e+06    5.96362e-02    9.74000e+01    

3496           +1             O4             1000           2.77143e+06    5.96362e-02    9.68000e+01    

3497           +1             O4             1000           2.82857e+06    5.96362e-02    9.59000e+01    

3498           +1             O4             1000           2.88571e+06    5.96362e-02    9.69000e+01    

3499           +1             O4             1000           2.94286e+06    5.96362e-02    9.74000e+01    

349            +1             O1             1000           2.94286e+06    1.75751e-02    0.00000e+00    

34             +1             O1             1000           2.08571e+06    1.00000e-02    0.00000e+00    

3500           +1             O4             1000           3.00000e+06    5.96362e-02    9.64000e+01    

3501           +1             O4             1000           2.00000e+05    6.55129e-02    0.00000e+00    

3502           +1             O4             1000           2.57143e+05    6.55129e-02    0.00000e+00    

3503           +1             O4             1000           3.14286e+05    6.55129e-02    0.00000e+00    

3504           +1             O4             1000           3.71429e+05    6.55129e-02    0.00000e+00    

3505           +1             O4             1000           4.28571e+05    6.55129e-02    0.00000e+00    

3506           +1             O4             1000           4.85714e+05    6.55129e-02    0.00000e+00    

3507           +1             O4             1000           5.42857e+05    6.55129e-02    0.00000e+00    

3508           +1             O4             1000           6.00000e+05    6.55129e-02    0.00000e+00    

3509           +1             O4             1000           6.57143e+05    6.55129e-02    0.00000e+00    

350            +1             O1             1000           3.00000e+06    1.75751e-02    0.00000e+00    

3510           +1             O4             1000           7.14286e+05    6.55129e-02    0.00000e+00    

3511           +1             O4             1000           7.71429e+05    6.55129e-02    1.00000e-01    

3512           +1             O4             1000           8.28571e+05    6.55129e-02    1.20000e+00    

3513           +1             O4             1000           8.85714e+05    6.55129e-02    3.60000e+00    

3514           +1             O4             1000           9.42857e+05    6.55129e-02    9.70000e+00    

3515           +1             O4             1000           1.00000e+06    6.55129e-02    1.58000e+01    

3516           +1             O4             1000           1.05714e+06    6.55129e-02    2.20000e+01    

3517           +1             O4             1000           1.11429e+06    6.55129e-02    2.90000e+01    

3518           +1             O4             1000           1.17143e+06    6.55129e-02    3.86000e+01    

3519           +1             O4             1000           1.22857e+06    6.55129e-02    4.60000e+01    

351            +1             O1             1000           2.00000e+05    1.93070e-02    0.00000e+00    

3520           +1             O4             1000           1.28571e+06    6.55129e-02    5.34000e+01    

3521           +1             O4             1000           1.34286e+06    6.55129e-02    5.72000e+01    

3522           +1             O4             1000           1.40000e+06    6.55129e-02    6.29000e+01    

3523           +1             O4             1000           1.45714e+06    6.55129e-02    6.94000e+01    

3524           +1             O4             1000           1.51429e+06    6.55129e-02    7.25000e+01    

3525           +1             O4             1000           1.57143e+06    6.55129e-02    7.72000e+01    

3526           +1             O4             1000           1.62857e+06    6.55129e-02    7.98000e+01    

3527           +1             O4             1000           1.68571e+06    6.55129e-02    8.11000e+01    

3528           +1             O4             1000           1.74286e+06    6.55129e-02    8.43000e+01    

3529           +1             O4             1000           1.80000e+06    6.55129e-02    8.55000e+01    

352            +1             O1             1000           2.57143e+05    1.93070e-02    0.00000e+00    

3530           +1             O4             1000           1.85714e+06    6.55129e-02    8.75000e+01    

3531           +1             O4             1000           1.91429e+06    6.55129e-02    8.89000e+01    

3532           +1             O4             1000           1.97143e+06    6.55129e-02    9.08000e+01    

3533           +1             O4             1000           2.02857e+06    6.55129e-02    9.19000e+01    

3534           +1             O4             1000           2.08571e+06    6.55129e-02    9.32000e+01    

3535           +1             O4             1000           2.14286e+06    6.55129e-02    9.37000e+01    

3536           +1             O4             1000           2.20000e+06    6.55129e-02    9.44000e+01    

3537           +1             O4             1000           2.25714e+06    6.55129e-02    9.39000e+01    

3538           +1             O4             1000           2.31429e+06    6.55129e-02    9.51000e+01    

3539           +1             O4             1000           2.37143e+06    6.55129e-02    9.53000e+01    

353            +1             O1             1000           3.14286e+05    1.93070e-02    0.00000e+00    

3540           +1             O4             1000           2.42857e+06    6.55129e-02    9.59000e+01    

3541           +1             O4             1000           2.48571e+06    6.55129e-02    9.68000e+01    

3542           +1             O4             1000           2.54286e+06    6.55129e-02    9.68000e+01    

3543           +1             O4             1000           2.60000e+06    6.55129e-02    9.74000e+01    

3544           +1             O4             1000           2.65714e+06    6.55129e-02    9.64000e+01    

3545           +1             O4             1000           2.71429e+06    6.55129e-02    9.76000e+01    

3546           +1             O4             1000           2.77143e+06    6.55129e-02    9.74000e+01    

3547           +1             O4             1000           2.82857e+06    6.55129e-02    9.70000e+01    

3548           +1             O4             1000           2.88571e+06    6.55129e-02    9.75000e+01    

3549           +1             O4             1000           2.94286e+06    6.55129e-02    9.81000e+01    

354            +1             O1             1000           3.71429e+05    1.93070e-02    0.00000e+00    

3550           +1             O4             1000           3.00000e+06    6.55129e-02    9.83000e+01    

3551           +1             O4             1000           2.00000e+05    7.19686e-02    0.00000e+00    

3552           +1             O4             1000           2.57143e+05    7.19686e-02    0.00000e+00    

3553           +1             O4             1000           3.14286e+05    7.19686e-02    0.00000e+00    

3554           +1             O4             1000           3.71429e+05    7.19686e-02    0.00000e+00    

3555           +1             O4             1000           4.28571e+05    7.19686e-02    0.00000e+00    

3556           +1             O4             1000           4.85714e+05    7.19686e-02    0.00000e+00    

3557           +1             O4             1000           5.42857e+05    7.19686e-02    0.00000e+00    

3558           +1             O4             1000           6.00000e+05    7.19686e-02    0.00000e+00    

3559           +1             O4             1000           6.57143e+05    7.19686e-02    0.00000e+00    

355            +1             O1             1000           4.28571e+05    1.93070e-02    0.00000e+00    

3560           +1             O4             1000           7.14286e+05    7.19686e-02    1.00000e-01    

3561           +1             O4             1000           7.71429e+05    7.19686e-02    1.10000e+00    

3562           +1             O4             1000           8.28571e+05    7.19686e-02    5.60000e+00    

3563           +1             O4             1000           8.85714e+05    7.19686e-02    9.60000e+00    

3564           +1             O4             1000           9.42857e+05    7.19686e-02    1.80000e+01    

3565           +1             O4             1000           1.00000e+06    7.19686e-02    2.48000e+01    

3566           +1             O4             1000           1.05714e+06    7.19686e-02    3.71000e+01    

3567           +1             O4             1000           1.11429e+06    7.19686e-02    4.35000e+01    

3568           +1             O4             1000           1.17143e+06    7.19686e-02    5.02000e+01    

3569           +1             O4             1000           1.22857e+06    7.19686e-02    5.49000e+01    

356            +1             O1             1000           4.85714e+05    1.93070e-02    0.00000e+00    

3570           +1             O4             1000           1.28571e+06    7.19686e-02    6.12000e+01    

3571           +1             O4             1000           1.34286e+06    7.19686e-02    6.93000e+01    

3572           +1             O4             1000           1.40000e+06    7.19686e-02    7.43000e+01    

3573           +1             O4             1000           1.45714e+06    7.19686e-02    7.80000e+01    

3574           +1             O4             1000           1.51429e+06    7.19686e-02    8.05000e+01    

3575           +1             O4             1000           1.57143e+06    7.19686e-02    7.99000e+01    

3576           +1             O4             1000           1.62857e+06    7.19686e-02    8.43000e+01    

3577           +1             O4             1000           1.68571e+06    7.19686e-02    8.78000e+01    

3578           +1             O4             1000           1.74286e+06    7.19686e-02    8.91000e+01    

3579           +1             O4             1000           1.80000e+06    7.19686e-02    8.97000e+01    

357            +1             O1             1000           5.42857e+05    1.93070e-02    0.00000e+00    

3580           +1             O4             1000           1.85714e+06    7.19686e-02    9.23000e+01    

3581           +1             O4             1000           1.91429e+06    7.19686e-02    9.18000e+01    

3582           +1             O4             1000           1.97143e+06    7.19686e-02    9.22000e+01    

3583           +1             O4             1000           2.02857e+06    7.19686e-02    9.42000e+01    

3584           +1             O4             1000           2.08571e+06    7.19686e-02    9.50000e+01    

3585           +1             O4             1000           2.14286e+06    7.19686e-02    9.35000e+01    

3586           +1             O4             1000           2.20000e+06    7.19686e-02    9.61000e+01    

3587           +1             O4             1000           2.25714e+06    7.19686e-02    9.51000e+01    

3588           +1             O4             1000           2.31429e+06    7.19686e-02    9.58000e+01    

3589           +1             O4             1000           2.37143e+06    7.19686e-02    9.65000e+01    

358            +1             O1             1000           6.00000e+05    1.93070e-02    0.00000e+00    

3590           +1             O4             1000           2.42857e+06    7.19686e-02    9.63000e+01    

3591           +1             O4             1000           2.48571e+06    7.19686e-02    9.78000e+01    

3592           +1             O4             1000           2.54286e+06    7.19686e-02    9.77000e+01    

3593           +1             O4             1000           2.60000e+06    7.19686e-02    9.82000e+01    

3594           +1             O4             1000           2.65714e+06    7.19686e-02    9.82000e+01    

3595           +1             O4             1000           2.71429e+06    7.19686e-02    9.82000e+01    

3596           +1             O4             1000           2.77143e+06    7.19686e-02    9.82000e+01    

3597           +1             O4             1000           2.82857e+06    7.19686e-02    9.84000e+01    

3598           +1             O4             1000           2.88571e+06    7.19686e-02    9.81000e+01    

3599           +1             O4             1000           2.94286e+06    7.19686e-02    9.84000e+01    

359            +1             O1             1000           6.57143e+05    1.93070e-02    0.00000e+00    

35             +1             O1             1000           2.14286e+06    1.00000e-02    0.00000e+00    

3600           +1             O4             1000           3.00000e+06    7.19686e-02    9.88000e+01    

3601           +1             O4             1000           2.00000e+05    7.90604e-02    0.00000e+00    

3602           +1             O4             1000           2.57143e+05    7.90604e-02    0.00000e+00    

3603           +1             O4             1000           3.14286e+05    7.90604e-02    0.00000e+00    

3604           +1             O4             1000           3.71429e+05    7.90604e-02    0.00000e+00    

3605           +1             O4             1000           4.28571e+05    7.90604e-02    0.00000e+00    

3606           +1             O4             1000           4.85714e+05    7.90604e-02    0.00000e+00    

3607           +1             O4             1000           5.42857e+05    7.90604e-02    0.00000e+00    

3608           +1             O4             1000           6.00000e+05    7.90604e-02    0.00000e+00    

3609           +1             O4             1000           6.57143e+05    7.90604e-02    4.00000e-01    

360            +1             O1             1000           7.14286e+05    1.93070e-02    0.00000e+00    

3610           +1             O4             1000           7.14286e+05    7.90604e-02    1.10000e+00    

3611           +1             O4             1000           7.71429e+05    7.90604e-02    5.70000e+00    

3612           +1             O4             1000           8.28571e+05    7.90604e-02    1.13000e+01    

3613           +1             O4             1000           8.85714e+05    7.90604e-02    2.15000e+01    

3614           +1             O4             1000           9.42857e+05    7.90604e-02    2.83000e+01    

3615           +1             O4             1000           1.00000e+06    7.90604e-02    4.16000e+01    

3616           +1             O4             1000           1.05714e+06    7.90604e-02    4.69000e+01    

3617           +1             O4             1000           1.11429e+06    7.90604e-02    5.42000e+01    

3618           +1             O4             1000           1.17143e+06    7.90604e-02    6.09000e+01    

3619           +1             O4             1000           1.22857e+06    7.90604e-02    6.77000e+01    

361            +1             O1             1000           7.71429e+05    1.93070e-02    0.00000e+00    

3620           +1             O4             1000           1.28571e+06    7.90604e-02    7.24000e+01    

3621           +1             O4             1000           1.34286e+06    7.90604e-02    7.78000e+01    

3622           +1             O4             1000           1.40000e+06    7.90604e-02    8.17000e+01    

3623           +1             O4             1000           1.45714e+06    7.90604e-02    8.21000e+01    

3624           +1             O4             1000           1.51429e+06    7.90604e-02    8.80000e+01    

3625           +1             O4             1000           1.57143e+06    7.90604e-02    8.60000e+01    

3626           +1             O4             1000           1.62857e+06    7.90604e-02    8.95000e+01    

3627           +1             O4             1000           1.68571e+06    7.90604e-02    9.14000e+01    

3628           +1             O4             1000           1.74286e+06    7.90604e-02    9.23000e+01    

3629           +1             O4             1000           1.80000e+06    7.90604e-02    9.24000e+01    

362            +1             O1             1000           8.28571e+05    1.93070e-02    0.00000e+00    

3630           +1             O4             1000           1.85714e+06    7.90604e-02    9.33000e+01    

3631           +1             O4             1000           1.91429e+06    7.90604e-02    9.52000e+01    

3632           +1             O4             1000           1.97143e+06    7.90604e-02    9.45000e+01    

3633           +1             O4             1000           2.02857e+06    7.90604e-02    9.64000e+01    

3634           +1             O4             1000           2.08571e+06    7.90604e-02    9.55000e+01    

3635           +1             O4             1000           2.14286e+06    7.90604e-02    9.77000e+01    

3636           +1             O4             1000           2.20000e+06    7.90604e-02    9.77000e+01    

3637           +1             O4             1000           2.25714e+06    7.90604e-02    9.76000e+01    

3638           +1             O4             1000           2.31429e+06    7.90604e-02    9.77000e+01    

3639           +1             O4             1000           2.37143e+06    7.90604e-02    9.84000e+01    

363            +1             O1             1000           8.85714e+05    1.93070e-02    0.00000e+00    

3640           +1             O4             1000           2.42857e+06    7.90604e-02    9.90000e+01    

3641           +1             O4             1000           2.48571e+06    7.90604e-02    9.82000e+01    

3642           +1             O4             1000           2.54286e+06    7.90604e-02    9.86000e+01    

3643           +1             O4             1000           2.60000e+06    7.90604e-02    9.88000e+01    

3644           +1             O4             1000           2.65714e+06    7.90604e-02    9.90000e+01    

3645           +1             O4             1000           2.71429e+06    7.90604e-02    9.89000e+01    

3646           +1             O4             1000           2.77143e+06    7.90604e-02    9.79000e+01    

3647           +1             O4             1000           2.82857e+06    7.90604e-02    9.92000e+01    

3648           +1             O4             1000           2.88571e+06    7.90604e-02    9.92000e+01    

3649           +1             O4             1000           2.94286e+06    7.90604e-02    9.90000e+01    

364            +1             O1             1000           9.42857e+05    1.93070e-02    0.00000e+00    

3650           +1             O4             1000           3.00000e+06    7.90604e-02    9.90000e+01    

3651           +1             O4             1000           2.00000e+05    8.68511e-02    0.00000e+00    

3652           +1             O4             1000           2.57143e+05    8.68511e-02    0.00000e+00    

3653           +1             O4             1000           3.14286e+05    8.68511e-02    0.00000e+00    

3654           +1             O4             1000           3.71429e+05    8.68511e-02    0.00000e+00    

3655           +1             O4             1000           4.28571e+05    8.68511e-02    0.00000e+00    

3656           +1             O4             1000           4.85714e+05    8.68511e-02    0.00000e+00    

3657           +1             O4             1000           5.42857e+05    8.68511e-02    0.00000e+00    

3658           +1             O4             1000           6.00000e+05    8.68511e-02    1.00000e-01    

3659           +1             O4             1000           6.57143e+05    8.68511e-02    6.00000e-01    

365            +1             O1             1000           1.00000e+06    1.93070e-02    0.00000e+00    

3660           +1             O4             1000           7.14286e+05    8.68511e-02    4.80000e+00    

3661           +1             O4             1000           7.71429e+05    8.68511e-02    1.17000e+01    

3662           +1             O4             1000           8.28571e+05    8.68511e-02    2.06000e+01    

3663           +1             O4             1000           8.85714e+05    8.68511e-02    3.39000e+01    

3664           +1             O4             1000           9.42857e+05    8.68511e-02    3.94000e+01    

3665           +1             O4             1000           1.00000e+06    8.68511e-02    5.45000e+01    

3666           +1             O4             1000           1.05714e+06    8.68511e-02    5.96000e+01    

3667           +1             O4             1000           1.11429e+06    8.68511e-02    6.68000e+01    

3668           +1             O4             1000           1.17143e+06    8.68511e-02    7.12000e+01    

3669           +1             O4             1000           1.22857e+06    8.68511e-02    7.91000e+01    

366            +1             O1             1000           1.05714e+06    1.93070e-02    0.00000e+00    

3670           +1             O4             1000           1.28571e+06    8.68511e-02    8.04000e+01    

3671           +1             O4             1000           1.34286e+06    8.68511e-02    8.45000e+01    

3672           +1             O4             1000           1.40000e+06    8.68511e-02    8.71000e+01    

3673           +1             O4             1000           1.45714e+06    8.68511e-02    8.67000e+01    

3674           +1             O4             1000           1.51429e+06    8.68511e-02    8.94000e+01    

3675           +1             O4             1000           1.57143e+06    8.68511e-02    9.17000e+01    

3676           +1             O4             1000           1.62857e+06    8.68511e-02    9.30000e+01    

3677           +1             O4             1000           1.68571e+06    8.68511e-02    9.23000e+01    

3678           +1             O4             1000           1.74286e+06    8.68511e-02    9.54000e+01    

3679           +1             O4             1000           1.80000e+06    8.68511e-02    9.44000e+01    

367            +1             O1             1000           1.11429e+06    1.93070e-02    0.00000e+00    

3680           +1             O4             1000           1.85714e+06    8.68511e-02    9.65000e+01    

3681           +1             O4             1000           1.91429e+06    8.68511e-02    9.57000e+01    

3682           +1             O4             1000           1.97143e+06    8.68511e-02    9.61000e+01    

3683           +1             O4             1000           2.02857e+06    8.68511e-02    9.75000e+01    

3684           +1             O4             1000           2.08571e+06    8.68511e-02    9.76000e+01    

3685           +1             O4             1000           2.14286e+06    8.68511e-02    9.84000e+01    

3686           +1             O4             1000           2.20000e+06    8.68511e-02    9.80000e+01    

3687           +1             O4             1000           2.25714e+06    8.68511e-02    9.78000e+01    

3688           +1             O4             1000           2.31429e+06    8.68511e-02    9.83000e+01    

3689           +1             O4             1000           2.37143e+06    8.68511e-02    9.85000e+01    

368            +1             O1             1000           1.17143e+06    1.93070e-02    0.00000e+00    

3690           +1             O4             1000           2.42857e+06    8.68511e-02    9.83000e+01    

3691           +1             O4             1000           2.48571e+06    8.68511e-02    9.83000e+01    

3692           +1             O4             1000           2.54286e+06    8.68511e-02    9.92000e+01    

3693           +1             O4             1000           2.60000e+06    8.68511e-02    9.82000e+01    

3694           +1             O4             1000           2.65714e+06    8.68511e-02    9.92000e+01    

3695           +1             O4             1000           2.71429e+06    8.68511e-02    9.91000e+01    

3696           +1             O4             1000           2.77143e+06    8.68511e-02    9.95000e+01    

3697           +1             O4             1000           2.82857e+06    8.68511e-02    9.93000e+01    

3698           +1             O4             1000           2.88571e+06    8.68511e-02    9.90000e+01    

3699           +1             O4             1000           2.94286e+06    8.68511e-02    9.96000e+01    

369            +1             O1             1000           1.22857e+06    1.93070e-02    0.00000e+00    

36             +1             O1             1000           2.20000e+06    1.00000e-02    0.00000e+00    

3700           +1             O4             1000           3.00000e+06    8.68511e-02    9.95000e+01    

3701           +1             O4             1000           2.00000e+05    9.54095e-02    0.00000e+00    

3702           +1             O4             1000           2.57143e+05    9.54095e-02    0.00000e+00    

3703           +1             O4             1000           3.14286e+05    9.54095e-02    0.00000e+00    

3704           +1             O4             1000           3.71429e+05    9.54095e-02    0.00000e+00    

3705           +1             O4             1000           4.28571e+05    9.54095e-02    0.00000e+00    

3706           +1             O4             1000           4.85714e+05    9.54095e-02    0.00000e+00    

3707           +1             O4             1000           5.42857e+05    9.54095e-02    1.00000e-01    

3708           +1             O4             1000           6.00000e+05    9.54095e-02    4.00000e-01    

3709           +1             O4             1000           6.57143e+05    9.54095e-02    4.10000e+00    

370            +1             O1             1000           1.28571e+06    1.93070e-02    0.00000e+00    

3710           +1             O4             1000           7.14286e+05    9.54095e-02    1.00000e+01    

3711           +1             O4             1000           7.71429e+05    9.54095e-02    2.04000e+01    

3712           +1             O4             1000           8.28571e+05    9.54095e-02    3.46000e+01    

3713           +1             O4             1000           8.85714e+05    9.54095e-02    4.30000e+01    

3714           +1             O4             1000           9.42857e+05    9.54095e-02    5.33000e+01    

3715           +1             O4             1000           1.00000e+06    9.54095e-02    6.17000e+01    

3716           +1             O4             1000           1.05714e+06    9.54095e-02    6.94000e+01    

3717           +1             O4             1000           1.11429e+06    9.54095e-02    7.39000e+01    

3718           +1             O4             1000           1.17143e+06    9.54095e-02    7.75000e+01    

3719           +1             O4             1000           1.22857e+06    9.54095e-02    8.37000e+01    

371            +1             O1             1000           1.34286e+06    1.93070e-02    0.00000e+00    

3720           +1             O4             1000           1.28571e+06    9.54095e-02    8.62000e+01    

3721           +1             O4             1000           1.34286e+06    9.54095e-02    8.94000e+01    

3722           +1             O4             1000           1.40000e+06    9.54095e-02    8.98000e+01    

3723           +1             O4             1000           1.45714e+06    9.54095e-02    9.20000e+01    

3724           +1             O4             1000           1.51429e+06    9.54095e-02    9.16000e+01    

3725           +1             O4             1000           1.57143e+06    9.54095e-02    9.37000e+01    

3726           +1             O4             1000           1.62857e+06    9.54095e-02    9.54000e+01    

3727           +1             O4             1000           1.68571e+06    9.54095e-02    9.51000e+01    

3728           +1             O4             1000           1.74286e+06    9.54095e-02    9.55000e+01    

3729           +1             O4             1000           1.80000e+06    9.54095e-02    9.69000e+01    

372            +1             O1             1000           1.40000e+06    1.93070e-02    0.00000e+00    

3730           +1             O4             1000           1.85714e+06    9.54095e-02    9.66000e+01    

3731           +1             O4             1000           1.91429e+06    9.54095e-02    9.70000e+01    

3732           +1             O4             1000           1.97143e+06    9.54095e-02    9.78000e+01    

3733           +1             O4             1000           2.02857e+06    9.54095e-02    9.78000e+01    

3734           +1             O4             1000           2.08571e+06    9.54095e-02    9.83000e+01    

3735           +1             O4             1000           2.14286e+06    9.54095e-02    9.84000e+01    

3736           +1             O4             1000           2.20000e+06    9.54095e-02    9.90000e+01    

3737           +1             O4             1000           2.25714e+06    9.54095e-02    9.86000e+01    

3738           +1             O4             1000           2.31429e+06    9.54095e-02    9.89000e+01    

3739           +1             O4             1000           2.37143e+06    9.54095e-02    9.85000e+01    

373            +1             O1             1000           1.45714e+06    1.93070e-02    0.00000e+00    

3740           +1             O4             1000           2.42857e+06    9.54095e-02    9.89000e+01    

3741           +1             O4             1000           2.48571e+06    9.54095e-02    9.94000e+01    

3742           +1             O4             1000           2.54286e+06    9.54095e-02    9.92000e+01    

3743           +1             O4             1000           2.60000e+06    9.54095e-02    9.85000e+01    

3744           +1             O4             1000           2.65714e+06    9.54095e-02    9.92000e+01    

3745           +1             O4             1000           2.71429e+06    9.54095e-02    9.94000e+01    

3746           +1             O4             1000           2.77143e+06    9.54095e-02    9.93000e+01    

3747           +1             O4             1000           2.82857e+06    9.54095e-02    9.98000e+01    

3748           +1             O4             1000           2.88571e+06    9.54095e-02    9.91000e+01    

3749           +1             O4             1000           2.94286e+06    9.54095e-02    9.93000e+01    

374            +1             O1             1000           1.51429e+06    1.93070e-02    0.00000e+00    

3750           +1             O4             1000           3.00000e+06    9.54095e-02    9.93000e+01    

3751           +1             O4             1000           2.00000e+05    1.04811e-01    0.00000e+00    

3752           +1             O4             1000           2.57143e+05    1.04811e-01    0.00000e+00    

3753           +1             O4             1000           3.14286e+05    1.04811e-01    0.00000e+00    

3754           +1             O4             1000           3.71429e+05    1.04811e-01    0.00000e+00    

3755           +1             O4             1000           4.28571e+05    1.04811e-01    0.00000e+00    

3756           +1             O4             1000           4.85714e+05    1.04811e-01    1.00000e-01    

3757           +1             O4             1000           5.42857e+05    1.04811e-01    3.00000e-01    

3758           +1             O4             1000           6.00000e+05    1.04811e-01    2.70000e+00    

3759           +1             O4             1000           6.57143e+05    1.04811e-01    7.70000e+00    

375            +1             O1             1000           1.57143e+06    1.93070e-02    0.00000e+00    

3760           +1             O4             1000           7.14286e+05    1.04811e-01    1.88000e+01    

3761           +1             O4             1000           7.71429e+05    1.04811e-01    3.23000e+01    

3762           +1             O4             1000           8.28571e+05    1.04811e-01    4.39000e+01    

3763           +1             O4             1000           8.85714e+05    1.04811e-01    5.61000e+01    

3764           +1             O4             1000           9.42857e+05    1.04811e-01    6.11000e+01    

3765           +1             O4             1000           1.00000e+06    1.04811e-01    7.26000e+01    

3766           +1             O4             1000           1.05714e+06    1.04811e-01    7.53000e+01    

3767           +1             O4             1000           1.11429e+06    1.04811e-01    8.02000e+01    

3768           +1             O4             1000           1.17143e+06    1.04811e-01    8.40000e+01    

3769           +1             O4             1000           1.22857e+06    1.04811e-01    8.77000e+01    

376            +1             O1             1000           1.62857e+06    1.93070e-02    0.00000e+00    

3770           +1             O4             1000           1.28571e+06    1.04811e-01    9.06000e+01    

3771           +1             O4             1000           1.34286e+06    1.04811e-01    9.30000e+01    

3772           +1             O4             1000           1.40000e+06    1.04811e-01    9.34000e+01    

3773           +1             O4             1000           1.45714e+06    1.04811e-01    9.50000e+01    

3774           +1             O4             1000           1.51429e+06    1.04811e-01    9.51000e+01    

3775           +1             O4             1000           1.57143e+06    1.04811e-01    9.64000e+01    

3776           +1             O4             1000           1.62857e+06    1.04811e-01    9.73000e+01    

3777           +1             O4             1000           1.68571e+06    1.04811e-01    9.62000e+01    

3778           +1             O4             1000           1.74286e+06    1.04811e-01    9.75000e+01    

3779           +1             O4             1000           1.80000e+06    1.04811e-01    9.76000e+01    

377            +1             O1             1000           1.68571e+06    1.93070e-02    0.00000e+00    

3780           +1             O4             1000           1.85714e+06    1.04811e-01    9.75000e+01    

3781           +1             O4             1000           1.91429e+06    1.04811e-01    9.86000e+01    

3782           +1             O4             1000           1.97143e+06    1.04811e-01    9.80000e+01    

3783           +1             O4             1000           2.02857e+06    1.04811e-01    9.83000e+01    

3784           +1             O4             1000           2.08571e+06    1.04811e-01    9.85000e+01    

3785           +1             O4             1000           2.14286e+06    1.04811e-01    9.88000e+01    

3786           +1             O4             1000           2.20000e+06    1.04811e-01    9.94000e+01    

3787           +1             O4             1000           2.25714e+06    1.04811e-01    9.91000e+01    

3788           +1             O4             1000           2.31429e+06    1.04811e-01    9.96000e+01    

3789           +1             O4             1000           2.37143e+06    1.04811e-01    9.97000e+01    

378            +1             O1             1000           1.74286e+06    1.93070e-02    0.00000e+00    

3790           +1             O4             1000           2.42857e+06    1.04811e-01    9.91000e+01    

3791           +1             O4             1000           2.48571e+06    1.04811e-01    9.95000e+01    

3792           +1             O4             1000           2.54286e+06    1.04811e-01    9.94000e+01    

3793           +1             O4             1000           2.60000e+06    1.04811e-01    9.91000e+01    

3794           +1             O4             1000           2.65714e+06    1.04811e-01    9.98000e+01    

3795           +1             O4             1000           2.71429e+06    1.04811e-01    9.90000e+01    

3796           +1             O4             1000           2.77143e+06    1.04811e-01    9.93000e+01    

3797           +1             O4             1000           2.82857e+06    1.04811e-01    9.96000e+01    

3798           +1             O4             1000           2.88571e+06    1.04811e-01    9.98000e+01    

3799           +1             O4             1000           2.94286e+06    1.04811e-01    9.94000e+01    

379            +1             O1             1000           1.80000e+06    1.93070e-02    0.00000e+00    

37             +1             O1             1000           2.25714e+06    1.00000e-02    0.00000e+00    

3800           +1             O4             1000           3.00000e+06    1.04811e-01    9.99000e+01    

3801           +1             O4             1000           2.00000e+05    1.15140e-01    0.00000e+00    

3802           +1             O4             1000           2.57143e+05    1.15140e-01    0.00000e+00    

3803           +1             O4             1000           3.14286e+05    1.15140e-01    0.00000e+00    

3804           +1             O4             1000           3.71429e+05    1.15140e-01    0.00000e+00    

3805           +1             O4             1000           4.28571e+05    1.15140e-01    0.00000e+00    

3806           +1             O4             1000           4.85714e+05    1.15140e-01    0.00000e+00    

3807           +1             O4             1000           5.42857e+05    1.15140e-01    5.00000e-01    

3808           +1             O4             1000           6.00000e+05    1.15140e-01    5.90000e+00    

3809           +1             O4             1000           6.57143e+05    1.15140e-01    1.90000e+01    

380            +1             O1             1000           1.85714e+06    1.93070e-02    0.00000e+00    

3810           +1             O4             1000           7.14286e+05    1.15140e-01    2.92000e+01    

3811           +1             O4             1000           7.71429e+05    1.15140e-01    4.55000e+01    

3812           +1             O4             1000           8.28571e+05    1.15140e-01    5.82000e+01    

3813           +1             O4             1000           8.85714e+05    1.15140e-01    6.56000e+01    

3814           +1             O4             1000           9.42857e+05    1.15140e-01    7.32000e+01    

3815           +1             O4             1000           1.00000e+06    1.15140e-01    7.91000e+01    

3816           +1             O4             1000           1.05714e+06    1.15140e-01    8.28000e+01    

3817           +1             O4             1000           1.11429e+06    1.15140e-01    8.55000e+01    

3818           +1             O4             1000           1.17143e+06    1.15140e-01    8.93000e+01    

3819           +1             O4             1000           1.22857e+06    1.15140e-01    9.15000e+01    

381            +1             O1             1000           1.91429e+06    1.93070e-02    0.00000e+00    

3820           +1             O4             1000           1.28571e+06    1.15140e-01    9.36000e+01    

3821           +1             O4             1000           1.34286e+06    1.15140e-01    9.44000e+01    

3822           +1             O4             1000           1.40000e+06    1.15140e-01    9.46000e+01    

3823           +1             O4             1000           1.45714e+06    1.15140e-01    9.55000e+01    

3824           +1             O4             1000           1.51429e+06    1.15140e-01    9.71000e+01    

3825           +1             O4             1000           1.57143e+06    1.15140e-01    9.75000e+01    

3826           +1             O4             1000           1.62857e+06    1.15140e-01    9.73000e+01    

3827           +1             O4             1000           1.68571e+06    1.15140e-01    9.89000e+01    

3828           +1             O4             1000           1.74286e+06    1.15140e-01    9.86000e+01    

3829           +1             O4             1000           1.80000e+06    1.15140e-01    9.88000e+01    

382            +1             O1             1000           1.97143e+06    1.93070e-02    0.00000e+00    

3830           +1             O4             1000           1.85714e+06    1.15140e-01    9.75000e+01    

3831           +1             O4             1000           1.91429e+06    1.15140e-01    9.91000e+01    

3832           +1             O4             1000           1.97143e+06    1.15140e-01    9.91000e+01    

3833           +1             O4             1000           2.02857e+06    1.15140e-01    9.94000e+01    

3834           +1             O4             1000           2.08571e+06    1.15140e-01    9.93000e+01    

3835           +1             O4             1000           2.14286e+06    1.15140e-01    9.95000e+01    

3836           +1             O4             1000           2.20000e+06    1.15140e-01    9.93000e+01    

3837           +1             O4             1000           2.25714e+06    1.15140e-01    9.96000e+01    

3838           +1             O4             1000           2.31429e+06    1.15140e-01    9.97000e+01    

3839           +1             O4             1000           2.37143e+06    1.15140e-01    9.93000e+01    

383            +1             O1             1000           2.02857e+06    1.93070e-02    0.00000e+00    

3840           +1             O4             1000           2.42857e+06    1.15140e-01    9.98000e+01    

3841           +1             O4             1000           2.48571e+06    1.15140e-01    9.90000e+01    

3842           +1             O4             1000           2.54286e+06    1.15140e-01    9.96000e+01    

3843           +1             O4             1000           2.60000e+06    1.15140e-01    9.98000e+01    

3844           +1             O4             1000           2.65714e+06    1.15140e-01    9.94000e+01    

3845           +1             O4             1000           2.71429e+06    1.15140e-01    9.97000e+01    

3846           +1             O4             1000           2.77143e+06    1.15140e-01    9.98000e+01    

3847           +1             O4             1000           2.82857e+06    1.15140e-01    9.98000e+01    

3848           +1             O4             1000           2.88571e+06    1.15140e-01    9.98000e+01    

3849           +1             O4             1000           2.94286e+06    1.15140e-01    9.98000e+01    

384            +1             O1             1000           2.08571e+06    1.93070e-02    0.00000e+00    

3850           +1             O4             1000           3.00000e+06    1.15140e-01    9.99000e+01    

3851           +1             O4             1000           2.00000e+05    1.26486e-01    0.00000e+00    

3852           +1             O4             1000           2.57143e+05    1.26486e-01    0.00000e+00    

3853           +1             O4             1000           3.14286e+05    1.26486e-01    0.00000e+00    

3854           +1             O4             1000           3.71429e+05    1.26486e-01    0.00000e+00    

3855           +1             O4             1000           4.28571e+05    1.26486e-01    0.00000e+00    

3856           +1             O4             1000           4.85714e+05    1.26486e-01    2.00000e-01    

3857           +1             O4             1000           5.42857e+05    1.26486e-01    3.30000e+00    

3858           +1             O4             1000           6.00000e+05    1.26486e-01    1.05000e+01    

3859           +1             O4             1000           6.57143e+05    1.26486e-01    2.33000e+01    

385            +1             O1             1000           2.14286e+06    1.93070e-02    0.00000e+00    

3860           +1             O4             1000           7.14286e+05    1.26486e-01    4.05000e+01    

3861           +1             O4             1000           7.71429e+05    1.26486e-01    5.46000e+01    

3862           +1             O4             1000           8.28571e+05    1.26486e-01    6.58000e+01    

3863           +1             O4             1000           8.85714e+05    1.26486e-01    7.42000e+01    

3864           +1             O4             1000           9.42857e+05    1.26486e-01    7.69000e+01    

3865           +1             O4             1000           1.00000e+06    1.26486e-01    8.10000e+01    

3866           +1             O4             1000           1.05714e+06    1.26486e-01    8.69000e+01    

3867           +1             O4             1000           1.11429e+06    1.26486e-01    9.15000e+01    

3868           +1             O4             1000           1.17143e+06    1.26486e-01    9.18000e+01    

3869           +1             O4             1000           1.22857e+06    1.26486e-01    9.51000e+01    

386            +1             O1             1000           2.20000e+06    1.93070e-02    0.00000e+00    

3870           +1             O4             1000           1.28571e+06    1.26486e-01    9.44000e+01    

3871           +1             O4             1000           1.34286e+06    1.26486e-01    9.65000e+01    

3872           +1             O4             1000           1.40000e+06    1.26486e-01    9.60000e+01    

3873           +1             O4             1000           1.45714e+06    1.26486e-01    9.77000e+01    

3874           +1             O4             1000           1.51429e+06    1.26486e-01    9.76000e+01    

3875           +1             O4             1000           1.57143e+06    1.26486e-01    9.76000e+01    

3876           +1             O4             1000           1.62857e+06    1.26486e-01    9.87000e+01    

3877           +1             O4             1000           1.68571e+06    1.26486e-01    9.92000e+01    

3878           +1             O4             1000           1.74286e+06    1.26486e-01    9.90000e+01    

3879           +1             O4             1000           1.80000e+06    1.26486e-01    9.89000e+01    

387            +1             O1             1000           2.25714e+06    1.93070e-02    0.00000e+00    

3880           +1             O4             1000           1.85714e+06    1.26486e-01    9.88000e+01    

3881           +1             O4             1000           1.91429e+06    1.26486e-01    9.93000e+01    

3882           +1             O4             1000           1.97143e+06    1.26486e-01    9.94000e+01    

3883           +1             O4             1000           2.02857e+06    1.26486e-01    9.98000e+01    

3884           +1             O4             1000           2.08571e+06    1.26486e-01    9.95000e+01    

3885           +1             O4             1000           2.14286e+06    1.26486e-01    9.94000e+01    

3886           +1             O4             1000           2.20000e+06    1.26486e-01    9.97000e+01    

3887           +1             O4             1000           2.25714e+06    1.26486e-01    9.94000e+01    

3888           +1             O4             1000           2.31429e+06    1.26486e-01    9.96000e+01    

3889           +1             O4             1000           2.37143e+06    1.26486e-01    9.97000e+01    

388            +1             O1             1000           2.31429e+06    1.93070e-02    0.00000e+00    

3890           +1             O4             1000           2.42857e+06    1.26486e-01    9.95000e+01    

3891           +1             O4             1000           2.48571e+06    1.26486e-01    9.97000e+01    

3892           +1             O4             1000           2.54286e+06    1.26486e-01    9.98000e+01    

3893           +1             O4             1000           2.60000e+06    1.26486e-01    9.93000e+01    

3894           +1             O4             1000           2.65714e+06    1.26486e-01    9.96000e+01    

3895           +1             O4             1000           2.71429e+06    1.26486e-01    9.97000e+01    

3896           +1             O4             1000           2.77143e+06    1.26486e-01    9.99000e+01    

3897           +1             O4             1000           2.82857e+06    1.26486e-01    1.00000e+02    

3898           +1             O4             1000           2.88571e+06    1.26486e-01    9.98000e+01    

3899           +1             O4             1000           2.94286e+06    1.26486e-01    9.99000e+01    

389            +1             O1             1000           2.37143e+06    1.93070e-02    0.00000e+00    

38             +1             O1             1000           2.31429e+06    1.00000e-02    0.00000e+00    

3900           +1             O4             1000           3.00000e+06    1.26486e-01    9.97000e+01    

3901           +1             O4             1000           2.00000e+05    1.38950e-01    0.00000e+00    

3902           +1             O4             1000           2.57143e+05    1.38950e-01    0.00000e+00    

3903           +1             O4             1000           3.14286e+05    1.38950e-01    0.00000e+00    

3904           +1             O4             1000           3.71429e+05    1.38950e-01    0.00000e+00    

3905           +1             O4             1000           4.28571e+05    1.38950e-01    0.00000e+00    

3906           +1             O4             1000           4.85714e+05    1.38950e-01    4.00000e-01    

3907           +1             O4             1000           5.42857e+05    1.38950e-01    8.00000e+00    

3908           +1             O4             1000           6.00000e+05    1.38950e-01    2.01000e+01    

3909           +1             O4             1000           6.57143e+05    1.38950e-01    3.72000e+01    

390            +1             O1             1000           2.42857e+06    1.93070e-02    0.00000e+00    

3910           +1             O4             1000           7.14286e+05    1.38950e-01    5.46000e+01    

3911           +1             O4             1000           7.71429e+05    1.38950e-01    6.26000e+01    

3912           +1             O4             1000           8.28571e+05    1.38950e-01    7.30000e+01    

3913           +1             O4             1000           8.85714e+05    1.38950e-01    7.84000e+01    

3914           +1             O4             1000           9.42857e+05    1.38950e-01    8.63000e+01    

3915           +1             O4             1000           1.00000e+06    1.38950e-01    8.66000e+01    

3916           +1             O4             1000           1.05714e+06    1.38950e-01    9.07000e+01    

3917           +1             O4             1000           1.11429e+06    1.38950e-01    9.22000e+01    

3918           +1             O4             1000           1.17143e+06    1.38950e-01    9.36000e+01    

3919           +1             O4             1000           1.22857e+06    1.38950e-01    9.57000e+01    

391            +1             O1             1000           2.48571e+06    1.93070e-02    0.00000e+00    

3920           +1             O4             1000           1.28571e+06    1.38950e-01    9.70000e+01    

3921           +1             O4             1000           1.34286e+06    1.38950e-01    9.79000e+01    

3922           +1             O4             1000           1.40000e+06    1.38950e-01    9.72000e+01    

3923           +1             O4             1000           1.45714e+06    1.38950e-01    9.82000e+01    

3924           +1             O4             1000           1.51429e+06    1.38950e-01    9.88000e+01    

3925           +1             O4             1000           1.57143e+06    1.38950e-01    9.94000e+01    

3926           +1             O4             1000           1.62857e+06    1.38950e-01    9.84000e+01    

3927           +1             O4             1000           1.68571e+06    1.38950e-01    9.93000e+01    

3928           +1             O4             1000           1.74286e+06    1.38950e-01    9.95000e+01    

3929           +1             O4             1000           1.80000e+06    1.38950e-01    9.93000e+01    

392            +1             O1             1000           2.54286e+06    1.93070e-02    0.00000e+00    

3930           +1             O4             1000           1.85714e+06    1.38950e-01    9.97000e+01    

3931           +1             O4             1000           1.91429e+06    1.38950e-01    9.92000e+01    

3932           +1             O4             1000           1.97143e+06    1.38950e-01    9.96000e+01    

3933           +1             O4             1000           2.02857e+06    1.38950e-01    9.91000e+01    

3934           +1             O4             1000           2.08571e+06    1.38950e-01    9.94000e+01    

3935           +1             O4             1000           2.14286e+06    1.38950e-01    9.99000e+01    

3936           +1             O4             1000           2.20000e+06    1.38950e-01    9.97000e+01    

3937           +1             O4             1000           2.25714e+06    1.38950e-01    9.99000e+01    

3938           +1             O4             1000           2.31429e+06    1.38950e-01    9.94000e+01    

3939           +1             O4             1000           2.37143e+06    1.38950e-01    9.99000e+01    

393            +1             O1             1000           2.60000e+06    1.93070e-02    0.00000e+00    

3940           +1             O4             1000           2.42857e+06    1.38950e-01    1.00000e+02    

3941           +1             O4             1000           2.48571e+06    1.38950e-01    9.98000e+01    

3942           +1             O4             1000           2.54286e+06    1.38950e-01    9.98000e+01    

3943           +1             O4             1000           2.60000e+06    1.38950e-01    9.98000e+01    

3944           +1             O4             1000           2.65714e+06    1.38950e-01    9.98000e+01    

3945           +1             O4             1000           2.71429e+06    1.38950e-01    9.98000e+01    

3946           +1             O4             1000           2.77143e+06    1.38950e-01    9.97000e+01    

3947           +1             O4             1000           2.82857e+06    1.38950e-01    1.00000e+02    

3948           +1             O4             1000           2.88571e+06    1.38950e-01    9.99000e+01    

3949           +1             O4             1000           2.94286e+06    1.38950e-01    1.00000e+02    

394            +1             O1             1000           2.65714e+06    1.93070e-02    0.00000e+00    

3950           +1             O4             1000           3.00000e+06    1.38950e-01    9.99000e+01    

3951           +1             O4             1000           2.00000e+05    1.52642e-01    0.00000e+00    

3952           +1             O4             1000           2.57143e+05    1.52642e-01    0.00000e+00    

3953           +1             O4             1000           3.14286e+05    1.52642e-01    0.00000e+00    

3954           +1             O4             1000           3.71429e+05    1.52642e-01    0.00000e+00    

3955           +1             O4             1000           4.28571e+05    1.52642e-01    2.00000e-01    

3956           +1             O4             1000           4.85714e+05    1.52642e-01    3.50000e+00    

3957           +1             O4             1000           5.42857e+05    1.52642e-01    1.37000e+01    

3958           +1             O4             1000           6.00000e+05    1.52642e-01    3.19000e+01    

3959           +1             O4             1000           6.57143e+05    1.52642e-01    4.80000e+01    

395            +1             O1             1000           2.71429e+06    1.93070e-02    0.00000e+00    

3960           +1             O4             1000           7.14286e+05    1.52642e-01    6.34000e+01    

3961           +1             O4             1000           7.71429e+05    1.52642e-01    7.50000e+01    

3962           +1             O4             1000           8.28571e+05    1.52642e-01    7.75000e+01    

3963           +1             O4             1000           8.85714e+05    1.52642e-01    8.43000e+01    

3964           +1             O4             1000           9.42857e+05    1.52642e-01    8.86000e+01    

3965           +1             O4             1000           1.00000e+06    1.52642e-01    9.24000e+01    

3966           +1             O4             1000           1.05714e+06    1.52642e-01    9.32000e+01    

3967           +1             O4             1000           1.11429e+06    1.52642e-01    9.48000e+01    

3968           +1             O4             1000           1.17143e+06    1.52642e-01    9.61000e+01    

3969           +1             O4             1000           1.22857e+06    1.52642e-01    9.69000e+01    

396            +1             O1             1000           2.77143e+06    1.93070e-02    0.00000e+00    

3970           +1             O4             1000           1.28571e+06    1.52642e-01    9.82000e+01    

3971           +1             O4             1000           1.34286e+06    1.52642e-01    9.79000e+01    

3972           +1             O4             1000           1.40000e+06    1.52642e-01    9.78000e+01    

3973           +1             O4             1000           1.45714e+06    1.52642e-01    9.89000e+01    

3974           +1             O4             1000           1.51429e+06    1.52642e-01    9.93000e+01    

3975           +1             O4             1000           1.57143e+06    1.52642e-01    9.88000e+01    

3976           +1             O4             1000           1.62857e+06    1.52642e-01    9.92000e+01    

3977           +1             O4             1000           1.68571e+06    1.52642e-01    9.94000e+01    

3978           +1             O4             1000           1.74286e+06    1.52642e-01    9.93000e+01    

3979           +1             O4             1000           1.80000e+06    1.52642e-01    9.95000e+01    

397            +1             O1             1000           2.82857e+06    1.93070e-02    0.00000e+00    

3980           +1             O4             1000           1.85714e+06    1.52642e-01    9.98000e+01    

3981           +1             O4             1000           1.91429e+06    1.52642e-01    9.95000e+01    

3982           +1             O4             1000           1.97143e+06    1.52642e-01    9.98000e+01    

3983           +1             O4             1000           2.02857e+06    1.52642e-01    9.94000e+01    

3984           +1             O4             1000           2.08571e+06    1.52642e-01    9.92000e+01    

3985           +1             O4             1000           2.14286e+06    1.52642e-01    9.98000e+01    

3986           +1             O4             1000           2.20000e+06    1.52642e-01    9.97000e+01    

3987           +1             O4             1000           2.25714e+06    1.52642e-01    1.00000e+02    

3988           +1             O4             1000           2.31429e+06    1.52642e-01    9.97000e+01    

3989           +1             O4             1000           2.37143e+06    1.52642e-01    9.99000e+01    

398            +1             O1             1000           2.88571e+06    1.93070e-02    0.00000e+00    

3990           +1             O4             1000           2.42857e+06    1.52642e-01    9.99000e+01    

3991           +1             O4             1000           2.48571e+06    1.52642e-01    9.99000e+01    

3992           +1             O4             1000           2.54286e+06    1.52642e-01    9.99000e+01    

3993           +1             O4             1000           2.60000e+06    1.52642e-01    1.00000e+02    

3994           +1             O4             1000           2.65714e+06    1.52642e-01    9.99000e+01    

3995           +1             O4             1000           2.71429e+06    1.52642e-01    1.00000e+02    

3996           +1             O4             1000           2.77143e+06    1.52642e-01    1.00000e+02    

3997           +1             O4             1000           2.82857e+06    1.52642e-01    1.00000e+02    

3998           +1             O4             1000           2.88571e+06    1.52642e-01    9.97000e+01    

3999           +1             O4             1000           2.94286e+06    1.52642e-01    1.00000e+02    

399            +1             O1             1000           2.94286e+06    1.93070e-02    0.00000e+00    

39             +1             O1             1000           2.37143e+06    1.00000e-02    0.00000e+00    

3              +1             O1             1000           3.14286e+05    1.00000e-02    0.00000e+00    

4000           +1             O4             1000           3.00000e+06    1.52642e-01    9.99000e+01    

4001           +1             O4             1000           2.00000e+05    1.67683e-01    0.00000e+00    

4002           +1             O4             1000           2.57143e+05    1.67683e-01    0.00000e+00    

4003           +1             O4             1000           3.14286e+05    1.67683e-01    0.00000e+00    

4004           +1             O4             1000           3.71429e+05    1.67683e-01    0.00000e+00    

4005           +1             O4             1000           4.28571e+05    1.67683e-01    8.00000e-01    

4006           +1             O4             1000           4.85714e+05    1.67683e-01    6.90000e+00    

4007           +1             O4             1000           5.42857e+05    1.67683e-01    2.14000e+01    

4008           +1             O4             1000           6.00000e+05    1.67683e-01    4.08000e+01    

4009           +1             O4             1000           6.57143e+05    1.67683e-01    5.84000e+01    

400            +1             O1             1000           3.00000e+06    1.93070e-02    0.00000e+00    

4010           +1             O4             1000           7.14286e+05    1.67683e-01    6.96000e+01    

4011           +1             O4             1000           7.71429e+05    1.67683e-01    7.68000e+01    

4012           +1             O4             1000           8.28571e+05    1.67683e-01    8.31000e+01    

4013           +1             O4             1000           8.85714e+05    1.67683e-01    8.93000e+01    

4014           +1             O4             1000           9.42857e+05    1.67683e-01    9.20000e+01    

4015           +1             O4             1000           1.00000e+06    1.67683e-01    9.43000e+01    

4016           +1             O4             1000           1.05714e+06    1.67683e-01    9.49000e+01    

4017           +1             O4             1000           1.11429e+06    1.67683e-01    9.65000e+01    

4018           +1             O4             1000           1.17143e+06    1.67683e-01    9.74000e+01    

4019           +1             O4             1000           1.22857e+06    1.67683e-01    9.82000e+01    

401            +1             O1             1000           2.00000e+05    2.12095e-02    0.00000e+00    

4020           +1             O4             1000           1.28571e+06    1.67683e-01    9.82000e+01    

4021           +1             O4             1000           1.34286e+06    1.67683e-01    9.80000e+01    

4022           +1             O4             1000           1.40000e+06    1.67683e-01    9.88000e+01    

4023           +1             O4             1000           1.45714e+06    1.67683e-01    9.91000e+01    

4024           +1             O4             1000           1.51429e+06    1.67683e-01    9.94000e+01    

4025           +1             O4             1000           1.57143e+06    1.67683e-01    9.92000e+01    

4026           +1             O4             1000           1.62857e+06    1.67683e-01    9.98000e+01    

4027           +1             O4             1000           1.68571e+06    1.67683e-01    9.95000e+01    

4028           +1             O4             1000           1.74286e+06    1.67683e-01    9.94000e+01    

4029           +1             O4             1000           1.80000e+06    1.67683e-01    9.97000e+01    

402            +1             O1             1000           2.57143e+05    2.12095e-02    0.00000e+00    

4030           +1             O4             1000           1.85714e+06    1.67683e-01    9.96000e+01    

4031           +1             O4             1000           1.91429e+06    1.67683e-01    9.96000e+01    

4032           +1             O4             1000           1.97143e+06    1.67683e-01    9.95000e+01    

4033           +1             O4             1000           2.02857e+06    1.67683e-01    9.99000e+01    

4034           +1             O4             1000           2.08571e+06    1.67683e-01    9.98000e+01    

4035           +1             O4             1000           2.14286e+06    1.67683e-01    9.96000e+01    

4036           +1             O4             1000           2.20000e+06    1.67683e-01    9.99000e+01    

4037           +1             O4             1000           2.25714e+06    1.67683e-01    9.98000e+01    

4038           +1             O4             1000           2.31429e+06    1.67683e-01    9.98000e+01    

4039           +1             O4             1000           2.37143e+06    1.67683e-01    9.99000e+01    

403            +1             O1             1000           3.14286e+05    2.12095e-02    0.00000e+00    

4040           +1             O4             1000           2.42857e+06    1.67683e-01    9.99000e+01    

4041           +1             O4             1000           2.48571e+06    1.67683e-01    9.97000e+01    

4042           +1             O4             1000           2.54286e+06    1.67683e-01    9.99000e+01    

4043           +1             O4             1000           2.60000e+06    1.67683e-01    9.99000e+01    

4044           +1             O4             1000           2.65714e+06    1.67683e-01    9.99000e+01    

4045           +1             O4             1000           2.71429e+06    1.67683e-01    9.99000e+01    

4046           +1             O4             1000           2.77143e+06    1.67683e-01    9.98000e+01    

4047           +1             O4             1000           2.82857e+06    1.67683e-01    1.00000e+02    

4048           +1             O4             1000           2.88571e+06    1.67683e-01    9.98000e+01    

4049           +1             O4             1000           2.94286e+06    1.67683e-01    1.00000e+02    

404            +1             O1             1000           3.71429e+05    2.12095e-02    0.00000e+00    

4050           +1             O4             1000           3.00000e+06    1.67683e-01    9.98000e+01    

4051           +1             O4             1000           2.00000e+05    1.84207e-01    0.00000e+00    

4052           +1             O4             1000           2.57143e+05    1.84207e-01    0.00000e+00    

4053           +1             O4             1000           3.14286e+05    1.84207e-01    0.00000e+00    

4054           +1             O4             1000           3.71429e+05    1.84207e-01    0.00000e+00    

4055           +1             O4             1000           4.28571e+05    1.84207e-01    2.00000e+00    

4056           +1             O4             1000           4.85714e+05    1.84207e-01    1.25000e+01    

4057           +1             O4             1000           5.42857e+05    1.84207e-01    3.29000e+01    

4058           +1             O4             1000           6.00000e+05    1.84207e-01    5.20000e+01    

4059           +1             O4             1000           6.57143e+05    1.84207e-01    6.56000e+01    

405            +1             O1             1000           4.28571e+05    2.12095e-02    0.00000e+00    

4060           +1             O4             1000           7.14286e+05    1.84207e-01    7.70000e+01    

4061           +1             O4             1000           7.71429e+05    1.84207e-01    8.47000e+01    

4062           +1             O4             1000           8.28571e+05    1.84207e-01    8.87000e+01    

4063           +1             O4             1000           8.85714e+05    1.84207e-01    9.13000e+01    

4064           +1             O4             1000           9.42857e+05    1.84207e-01    9.46000e+01    

4065           +1             O4             1000           1.00000e+06    1.84207e-01    9.44000e+01    

4066           +1             O4             1000           1.05714e+06    1.84207e-01    9.68000e+01    

4067           +1             O4             1000           1.11429e+06    1.84207e-01    9.73000e+01    

4068           +1             O4             1000           1.17143e+06    1.84207e-01    9.76000e+01    

4069           +1             O4             1000           1.22857e+06    1.84207e-01    9.86000e+01    

406            +1             O1             1000           4.85714e+05    2.12095e-02    0.00000e+00    

4070           +1             O4             1000           1.28571e+06    1.84207e-01    9.88000e+01    

4071           +1             O4             1000           1.34286e+06    1.84207e-01    9.91000e+01    

4072           +1             O4             1000           1.40000e+06    1.84207e-01    9.93000e+01    

4073           +1             O4             1000           1.45714e+06    1.84207e-01    9.95000e+01    

4074           +1             O4             1000           1.51429e+06    1.84207e-01    9.95000e+01    

4075           +1             O4             1000           1.57143e+06    1.84207e-01    9.94000e+01    

4076           +1             O4             1000           1.62857e+06    1.84207e-01    9.96000e+01    

4077           +1             O4             1000           1.68571e+06    1.84207e-01    9.96000e+01    

4078           +1             O4             1000           1.74286e+06    1.84207e-01    9.98000e+01    

4079           +1             O4             1000           1.80000e+06    1.84207e-01    9.98000e+01    

407            +1             O1             1000           5.42857e+05    2.12095e-02    0.00000e+00    

4080           +1             O4             1000           1.85714e+06    1.84207e-01    9.98000e+01    

4081           +1             O4             1000           1.91429e+06    1.84207e-01    9.98000e+01    

4082           +1             O4             1000           1.97143e+06    1.84207e-01    9.99000e+01    

4083           +1             O4             1000           2.02857e+06    1.84207e-01    9.97000e+01    

4084           +1             O4             1000           2.08571e+06    1.84207e-01    9.99000e+01    

4085           +1             O4             1000           2.14286e+06    1.84207e-01    9.99000e+01    

4086           +1             O4             1000           2.20000e+06    1.84207e-01    1.00000e+02    

4087           +1             O4             1000           2.25714e+06    1.84207e-01    1.00000e+02    

4088           +1             O4             1000           2.31429e+06    1.84207e-01    9.99000e+01    

4089           +1             O4             1000           2.37143e+06    1.84207e-01    9.98000e+01    

408            +1             O1             1000           6.00000e+05    2.12095e-02    0.00000e+00    

4090           +1             O4             1000           2.42857e+06    1.84207e-01    9.99000e+01    

4091           +1             O4             1000           2.48571e+06    1.84207e-01    1.00000e+02    

4092           +1             O4             1000           2.54286e+06    1.84207e-01    9.99000e+01    

4093           +1             O4             1000           2.60000e+06    1.84207e-01    1.00000e+02    

4094           +1             O4             1000           2.65714e+06    1.84207e-01    9.97000e+01    

4095           +1             O4             1000           2.71429e+06    1.84207e-01    1.00000e+02    

4096           +1             O4             1000           2.77143e+06    1.84207e-01    9.98000e+01    

4097           +1             O4             1000           2.82857e+06    1.84207e-01    1.00000e+02    

4098           +1             O4             1000           2.88571e+06    1.84207e-01    1.00000e+02    

4099           +1             O4             1000           2.94286e+06    1.84207e-01    9.99000e+01    

409            +1             O1             1000           6.57143e+05    2.12095e-02    0.00000e+00    

40             +1             O1             1000           2.42857e+06    1.00000e-02    0.00000e+00    

4100           +1             O4             1000           3.00000e+06    1.84207e-01    9.99000e+01    

4101           +1             O4             1000           2.00000e+05    2.02359e-01    0.00000e+00    

4102           +1             O4             1000           2.57143e+05    2.02359e-01    0.00000e+00    

4103           +1             O4             1000           3.14286e+05    2.02359e-01    0.00000e+00    

4104           +1             O4             1000           3.71429e+05    2.02359e-01    2.00000e-01    

4105           +1             O4             1000           4.28571e+05    2.02359e-01    5.30000e+00    

4106           +1             O4             1000           4.85714e+05    2.02359e-01    2.03000e+01    

4107           +1             O4             1000           5.42857e+05    2.02359e-01    4.13000e+01    

4108           +1             O4             1000           6.00000e+05    2.02359e-01    6.01000e+01    

4109           +1             O4             1000           6.57143e+05    2.02359e-01    7.31000e+01    

410            +1             O1             1000           7.14286e+05    2.12095e-02    0.00000e+00    

4110           +1             O4             1000           7.14286e+05    2.02359e-01    8.18000e+01    

4111           +1             O4             1000           7.71429e+05    2.02359e-01    8.98000e+01    

4112           +1             O4             1000           8.28571e+05    2.02359e-01    9.22000e+01    

4113           +1             O4             1000           8.85714e+05    2.02359e-01    9.37000e+01    

4114           +1             O4             1000           9.42857e+05    2.02359e-01    9.65000e+01    

4115           +1             O4             1000           1.00000e+06    2.02359e-01    9.65000e+01    

4116           +1             O4             1000           1.05714e+06    2.02359e-01    9.83000e+01    

4117           +1             O4             1000           1.11429e+06    2.02359e-01    9.85000e+01    

4118           +1             O4             1000           1.17143e+06    2.02359e-01    9.83000e+01    

4119           +1             O4             1000           1.22857e+06    2.02359e-01    9.86000e+01    

411            +1             O1             1000           7.71429e+05    2.12095e-02    0.00000e+00    

4120           +1             O4             1000           1.28571e+06    2.02359e-01    9.90000e+01    

4121           +1             O4             1000           1.34286e+06    2.02359e-01    9.92000e+01    

4122           +1             O4             1000           1.40000e+06    2.02359e-01    9.94000e+01    

4123           +1             O4             1000           1.45714e+06    2.02359e-01    9.96000e+01    

4124           +1             O4             1000           1.51429e+06    2.02359e-01    9.96000e+01    

4125           +1             O4             1000           1.57143e+06    2.02359e-01    9.97000e+01    

4126           +1             O4             1000           1.62857e+06    2.02359e-01    9.96000e+01    

4127           +1             O4             1000           1.68571e+06    2.02359e-01    9.99000e+01    

4128           +1             O4             1000           1.74286e+06    2.02359e-01    9.98000e+01    

4129           +1             O4             1000           1.80000e+06    2.02359e-01    9.98000e+01    

412            +1             O1             1000           8.28571e+05    2.12095e-02    0.00000e+00    

4130           +1             O4             1000           1.85714e+06    2.02359e-01    9.98000e+01    

4131           +1             O4             1000           1.91429e+06    2.02359e-01    1.00000e+02    

4132           +1             O4             1000           1.97143e+06    2.02359e-01    9.98000e+01    

4133           +1             O4             1000           2.02857e+06    2.02359e-01    1.00000e+02    

4134           +1             O4             1000           2.08571e+06    2.02359e-01    9.98000e+01    

4135           +1             O4             1000           2.14286e+06    2.02359e-01    9.99000e+01    

4136           +1             O4             1000           2.20000e+06    2.02359e-01    9.99000e+01    

4137           +1             O4             1000           2.25714e+06    2.02359e-01    9.99000e+01    

4138           +1             O4             1000           2.31429e+06    2.02359e-01    9.99000e+01    

4139           +1             O4             1000           2.37143e+06    2.02359e-01    1.00000e+02    

413            +1             O1             1000           8.85714e+05    2.12095e-02    0.00000e+00    

4140           +1             O4             1000           2.42857e+06    2.02359e-01    1.00000e+02    

4141           +1             O4             1000           2.48571e+06    2.02359e-01    1.00000e+02    

4142           +1             O4             1000           2.54286e+06    2.02359e-01    1.00000e+02    

4143           +1             O4             1000           2.60000e+06    2.02359e-01    9.99000e+01    

4144           +1             O4             1000           2.65714e+06    2.02359e-01    1.00000e+02    

4145           +1             O4             1000           2.71429e+06    2.02359e-01    9.99000e+01    

4146           +1             O4             1000           2.77143e+06    2.02359e-01    1.00000e+02    

4147           +1             O4             1000           2.82857e+06    2.02359e-01    9.98000e+01    

4148           +1             O4             1000           2.88571e+06    2.02359e-01    1.00000e+02    

4149           +1             O4             1000           2.94286e+06    2.02359e-01    1.00000e+02    

414            +1             O1             1000           9.42857e+05    2.12095e-02    0.00000e+00    

4150           +1             O4             1000           3.00000e+06    2.02359e-01    1.00000e+02    

4151           +1             O4             1000           2.00000e+05    2.22300e-01    0.00000e+00    

4152           +1             O4             1000           2.57143e+05    2.22300e-01    0.00000e+00    

4153           +1             O4             1000           3.14286e+05    2.22300e-01    0.00000e+00    

4154           +1             O4             1000           3.71429e+05    2.22300e-01    2.00000e-01    

4155           +1             O4             1000           4.28571e+05    2.22300e-01    7.60000e+00    

4156           +1             O4             1000           4.85714e+05    2.22300e-01    2.59000e+01    

4157           +1             O4             1000           5.42857e+05    2.22300e-01    5.12000e+01    

4158           +1             O4             1000           6.00000e+05    2.22300e-01    6.79000e+01    

4159           +1             O4             1000           6.57143e+05    2.22300e-01    8.06000e+01    

415            +1             O1             1000           1.00000e+06    2.12095e-02    0.00000e+00    

4160           +1             O4             1000           7.14286e+05    2.22300e-01    8.86000e+01    

4161           +1             O4             1000           7.71429e+05    2.22300e-01    8.95000e+01    

4162           +1             O4             1000           8.28571e+05    2.22300e-01    9.41000e+01    

4163           +1             O4             1000           8.85714e+05    2.22300e-01    9.47000e+01    

4164           +1             O4             1000           9.42857e+05    2.22300e-01    9.76000e+01    

4165           +1             O4             1000           1.00000e+06    2.22300e-01    9.76000e+01    

4166           +1             O4             1000           1.05714e+06    2.22300e-01    9.85000e+01    

4167           +1             O4             1000           1.11429e+06    2.22300e-01    9.96000e+01    

4168           +1             O4             1000           1.17143e+06    2.22300e-01    9.92000e+01    

4169           +1             O4             1000           1.22857e+06    2.22300e-01    9.90000e+01    

416            +1             O1             1000           1.05714e+06    2.12095e-02    0.00000e+00    

4170           +1             O4             1000           1.28571e+06    2.22300e-01    9.96000e+01    

4171           +1             O4             1000           1.34286e+06    2.22300e-01    9.92000e+01    

4172           +1             O4             1000           1.40000e+06    2.22300e-01    9.94000e+01    

4173           +1             O4             1000           1.45714e+06    2.22300e-01    1.00000e+02    

4174           +1             O4             1000           1.51429e+06    2.22300e-01    9.99000e+01    

4175           +1             O4             1000           1.57143e+06    2.22300e-01    9.99000e+01    

4176           +1             O4             1000           1.62857e+06    2.22300e-01    9.98000e+01    

4177           +1             O4             1000           1.68571e+06    2.22300e-01    9.98000e+01    

4178           +1             O4             1000           1.74286e+06    2.22300e-01    9.98000e+01    

4179           +1             O4             1000           1.80000e+06    2.22300e-01    9.99000e+01    

417            +1             O1             1000           1.11429e+06    2.12095e-02    0.00000e+00    

4180           +1             O4             1000           1.85714e+06    2.22300e-01    9.98000e+01    

4181           +1             O4             1000           1.91429e+06    2.22300e-01    1.00000e+02    

4182           +1             O4             1000           1.97143e+06    2.22300e-01    9.99000e+01    

4183           +1             O4             1000           2.02857e+06    2.22300e-01    9.99000e+01    

4184           +1             O4             1000           2.08571e+06    2.22300e-01    9.99000e+01    

4185           +1             O4             1000           2.14286e+06    2.22300e-01    9.98000e+01    

4186           +1             O4             1000           2.20000e+06    2.22300e-01    1.00000e+02    

4187           +1             O4             1000           2.25714e+06    2.22300e-01    1.00000e+02    

4188           +1             O4             1000           2.31429e+06    2.22300e-01    1.00000e+02    

4189           +1             O4             1000           2.37143e+06    2.22300e-01    1.00000e+02    

418            +1             O1             1000           1.17143e+06    2.12095e-02    0.00000e+00    

4190           +1             O4             1000           2.42857e+06    2.22300e-01    9.99000e+01    

4191           +1             O4             1000           2.48571e+06    2.22300e-01    9.99000e+01    

4192           +1             O4             1000           2.54286e+06    2.22300e-01    9.99000e+01    

4193           +1             O4             1000           2.60000e+06    2.22300e-01    1.00000e+02    

4194           +1             O4             1000           2.65714e+06    2.22300e-01    1.00000e+02    

4195           +1             O4             1000           2.71429e+06    2.22300e-01    1.00000e+02    

4196           +1             O4             1000           2.77143e+06    2.22300e-01    1.00000e+02    

4197           +1             O4             1000           2.82857e+06    2.22300e-01    9.98000e+01    

4198           +1             O4             1000           2.88571e+06    2.22300e-01    1.00000e+02    

4199           +1             O4             1000           2.94286e+06    2.22300e-01    1.00000e+02    

419            +1             O1             1000           1.22857e+06    2.12095e-02    0.00000e+00    

41             +1             O1             1000           2.48571e+06    1.00000e-02    0.00000e+00    

4200           +1             O4             1000           3.00000e+06    2.22300e-01    1.00000e+02    

4201           +1             O4             1000           2.00000e+05    2.44205e-01    0.00000e+00    

4202           +1             O4             1000           2.57143e+05    2.44205e-01    0.00000e+00    

4203           +1             O4             1000           3.14286e+05    2.44205e-01    0.00000e+00    

4204           +1             O4             1000           3.71429e+05    2.44205e-01    6.00000e-01    

4205           +1             O4             1000           4.28571e+05    2.44205e-01    1.45000e+01    

4206           +1             O4             1000           4.85714e+05    2.44205e-01    3.76000e+01    

4207           +1             O4             1000           5.42857e+05    2.44205e-01    5.72000e+01    

4208           +1             O4             1000           6.00000e+05    2.44205e-01    7.46000e+01    

4209           +1             O4             1000           6.57143e+05    2.44205e-01    8.48000e+01    

420            +1             O1             1000           1.28571e+06    2.12095e-02    0.00000e+00    

4210           +1             O4             1000           7.14286e+05    2.44205e-01    8.87000e+01    

4211           +1             O4             1000           7.71429e+05    2.44205e-01    9.29000e+01    

4212           +1             O4             1000           8.28571e+05    2.44205e-01    9.68000e+01    

4213           +1             O4             1000           8.85714e+05    2.44205e-01    9.76000e+01    

4214           +1             O4             1000           9.42857e+05    2.44205e-01    9.78000e+01    

4215           +1             O4             1000           1.00000e+06    2.44205e-01    9.89000e+01    

4216           +1             O4             1000           1.05714e+06    2.44205e-01    9.88000e+01    

4217           +1             O4             1000           1.11429e+06    2.44205e-01    9.92000e+01    

4218           +1             O4             1000           1.17143e+06    2.44205e-01    9.94000e+01    

4219           +1             O4             1000           1.22857e+06    2.44205e-01    9.94000e+01    

421            +1             O1             1000           1.34286e+06    2.12095e-02    0.00000e+00    

4220           +1             O4             1000           1.28571e+06    2.44205e-01    9.94000e+01    

4221           +1             O4             1000           1.34286e+06    2.44205e-01    9.97000e+01    

4222           +1             O4             1000           1.40000e+06    2.44205e-01    9.99000e+01    

4223           +1             O4             1000           1.45714e+06    2.44205e-01    9.97000e+01    

4224           +1             O4             1000           1.51429e+06    2.44205e-01    9.98000e+01    

4225           +1             O4             1000           1.57143e+06    2.44205e-01    9.99000e+01    

4226           +1             O4             1000           1.62857e+06    2.44205e-01    9.98000e+01    

4227           +1             O4             1000           1.68571e+06    2.44205e-01    9.98000e+01    

4228           +1             O4             1000           1.74286e+06    2.44205e-01    9.98000e+01    

4229           +1             O4             1000           1.80000e+06    2.44205e-01    1.00000e+02    

422            +1             O1             1000           1.40000e+06    2.12095e-02    0.00000e+00    

4230           +1             O4             1000           1.85714e+06    2.44205e-01    1.00000e+02    

4231           +1             O4             1000           1.91429e+06    2.44205e-01    9.99000e+01    

4232           +1             O4             1000           1.97143e+06    2.44205e-01    9.99000e+01    

4233           +1             O4             1000           2.02857e+06    2.44205e-01    1.00000e+02    

4234           +1             O4             1000           2.08571e+06    2.44205e-01    9.99000e+01    

4235           +1             O4             1000           2.14286e+06    2.44205e-01    9.99000e+01    

4236           +1             O4             1000           2.20000e+06    2.44205e-01    9.99000e+01    

4237           +1             O4             1000           2.25714e+06    2.44205e-01    1.00000e+02    

4238           +1             O4             1000           2.31429e+06    2.44205e-01    9.99000e+01    

4239           +1             O4             1000           2.37143e+06    2.44205e-01    9.99000e+01    

423            +1             O1             1000           1.45714e+06    2.12095e-02    0.00000e+00    

4240           +1             O4             1000           2.42857e+06    2.44205e-01    1.00000e+02    

4241           +1             O4             1000           2.48571e+06    2.44205e-01    9.99000e+01    

4242           +1             O4             1000           2.54286e+06    2.44205e-01    1.00000e+02    

4243           +1             O4             1000           2.60000e+06    2.44205e-01    1.00000e+02    

4244           +1             O4             1000           2.65714e+06    2.44205e-01    1.00000e+02    

4245           +1             O4             1000           2.71429e+06    2.44205e-01    1.00000e+02    

4246           +1             O4             1000           2.77143e+06    2.44205e-01    1.00000e+02    

4247           +1             O4             1000           2.82857e+06    2.44205e-01    1.00000e+02    

4248           +1             O4             1000           2.88571e+06    2.44205e-01    1.00000e+02    

4249           +1             O4             1000           2.94286e+06    2.44205e-01    1.00000e+02    

424            +1             O1             1000           1.51429e+06    2.12095e-02    0.00000e+00    

4250           +1             O4             1000           3.00000e+06    2.44205e-01    1.00000e+02    

4251           +1             O4             1000           2.00000e+05    2.68270e-01    0.00000e+00    

4252           +1             O4             1000           2.57143e+05    2.68270e-01    0.00000e+00    

4253           +1             O4             1000           3.14286e+05    2.68270e-01    0.00000e+00    

4254           +1             O4             1000           3.71429e+05    2.68270e-01    3.00000e+00    

4255           +1             O4             1000           4.28571e+05    2.68270e-01    2.14000e+01    

4256           +1             O4             1000           4.85714e+05    2.68270e-01    4.62000e+01    

4257           +1             O4             1000           5.42857e+05    2.68270e-01    6.74000e+01    

4258           +1             O4             1000           6.00000e+05    2.68270e-01    8.02000e+01    

4259           +1             O4             1000           6.57143e+05    2.68270e-01    8.94000e+01    

425            +1             O1             1000           1.57143e+06    2.12095e-02    0.00000e+00    

4260           +1             O4             1000           7.14286e+05    2.68270e-01    9.14000e+01    

4261           +1             O4             1000           7.71429e+05    2.68270e-01    9.49000e+01    

4262           +1             O4             1000           8.28571e+05    2.68270e-01    9.74000e+01    

4263           +1             O4             1000           8.85714e+05    2.68270e-01    9.72000e+01    

4264           +1             O4             1000           9.42857e+05    2.68270e-01    9.94000e+01    

4265           +1             O4             1000           1.00000e+06    2.68270e-01    9.85000e+01    

4266           +1             O4             1000           1.05714e+06    2.68270e-01    9.94000e+01    

4267           +1             O4             1000           1.11429e+06    2.68270e-01    9.94000e+01    

4268           +1             O4             1000           1.17143e+06    2.68270e-01    9.95000e+01    

4269           +1             O4             1000           1.22857e+06    2.68270e-01    9.98000e+01    

426            +1             O1             1000           1.62857e+06    2.12095e-02    0.00000e+00    

4270           +1             O4             1000           1.28571e+06    2.68270e-01    9.96000e+01    

4271           +1             O4             1000           1.34286e+06    2.68270e-01    9.96000e+01    

4272           +1             O4             1000           1.40000e+06    2.68270e-01    9.98000e+01    

4273           +1             O4             1000           1.45714e+06    2.68270e-01    1.00000e+02    

4274           +1             O4             1000           1.51429e+06    2.68270e-01    1.00000e+02    

4275           +1             O4             1000           1.57143e+06    2.68270e-01    9.98000e+01    

4276           +1             O4             1000           1.62857e+06    2.68270e-01    9.99000e+01    

4277           +1             O4             1000           1.68571e+06    2.68270e-01    1.00000e+02    

4278           +1             O4             1000           1.74286e+06    2.68270e-01    9.98000e+01    

4279           +1             O4             1000           1.80000e+06    2.68270e-01    9.98000e+01    

427            +1             O1             1000           1.68571e+06    2.12095e-02    0.00000e+00    

4280           +1             O4             1000           1.85714e+06    2.68270e-01    1.00000e+02    

4281           +1             O4             1000           1.91429e+06    2.68270e-01    1.00000e+02    

4282           +1             O4             1000           1.97143e+06    2.68270e-01    9.99000e+01    

4283           +1             O4             1000           2.02857e+06    2.68270e-01    1.00000e+02    

4284           +1             O4             1000           2.08571e+06    2.68270e-01    9.99000e+01    

4285           +1             O4             1000           2.14286e+06    2.68270e-01    9.99000e+01    

4286           +1             O4             1000           2.20000e+06    2.68270e-01    1.00000e+02    

4287           +1             O4             1000           2.25714e+06    2.68270e-01    9.99000e+01    

4288           +1             O4             1000           2.31429e+06    2.68270e-01    9.99000e+01    

4289           +1             O4             1000           2.37143e+06    2.68270e-01    1.00000e+02    

428            +1             O1             1000           1.74286e+06    2.12095e-02    0.00000e+00    

4290           +1             O4             1000           2.42857e+06    2.68270e-01    1.00000e+02    

4291           +1             O4             1000           2.48571e+06    2.68270e-01    1.00000e+02    

4292           +1             O4             1000           2.54286e+06    2.68270e-01    1.00000e+02    

4293           +1             O4             1000           2.60000e+06    2.68270e-01    1.00000e+02    

4294           +1             O4             1000           2.65714e+06    2.68270e-01    9.99000e+01    

4295           +1             O4             1000           2.71429e+06    2.68270e-01    1.00000e+02    

4296           +1             O4             1000           2.77143e+06    2.68270e-01    1.00000e+02    

4297           +1             O4             1000           2.82857e+06    2.68270e-01    1.00000e+02    

4298           +1             O4             1000           2.88571e+06    2.68270e-01    1.00000e+02    

4299           +1             O4             1000           2.94286e+06    2.68270e-01    1.00000e+02    

429            +1             O1             1000           1.80000e+06    2.12095e-02    0.00000e+00    

42             +1             O1             1000           2.54286e+06    1.00000e-02    0.00000e+00    

4300           +1             O4             1000           3.00000e+06    2.68270e-01    1.00000e+02    

4301           +1             O4             1000           2.00000e+05    2.94705e-01    0.00000e+00    

4302           +1             O4             1000           2.57143e+05    2.94705e-01    0.00000e+00    

4303           +1             O4             1000           3.14286e+05    2.94705e-01    0.00000e+00    

4304           +1             O4             1000           3.71429e+05    2.94705e-01    4.70000e+00    

4305           +1             O4             1000           4.28571e+05    2.94705e-01    2.83000e+01    

4306           +1             O4             1000           4.85714e+05    2.94705e-01    5.53000e+01    

4307           +1             O4             1000           5.42857e+05    2.94705e-01    7.69000e+01    

4308           +1             O4             1000           6.00000e+05    2.94705e-01    8.49000e+01    

4309           +1             O4             1000           6.57143e+05    2.94705e-01    9.05000e+01    

430            +1             O1             1000           1.85714e+06    2.12095e-02    0.00000e+00    

4310           +1             O4             1000           7.14286e+05    2.94705e-01    9.45000e+01    

4311           +1             O4             1000           7.71429e+05    2.94705e-01    9.65000e+01    

4312           +1             O4             1000           8.28571e+05    2.94705e-01    9.79000e+01    

4313           +1             O4             1000           8.85714e+05    2.94705e-01    9.81000e+01    

4314           +1             O4             1000           9.42857e+05    2.94705e-01    9.92000e+01    

4315           +1             O4             1000           1.00000e+06    2.94705e-01    9.94000e+01    

4316           +1             O4             1000           1.05714e+06    2.94705e-01    9.95000e+01    

4317           +1             O4             1000           1.11429e+06    2.94705e-01    9.92000e+01    

4318           +1             O4             1000           1.17143e+06    2.94705e-01    9.99000e+01    

4319           +1             O4             1000           1.22857e+06    2.94705e-01    9.96000e+01    

431            +1             O1             1000           1.91429e+06    2.12095e-02    0.00000e+00    

4320           +1             O4             1000           1.28571e+06    2.94705e-01    9.96000e+01    

4321           +1             O4             1000           1.34286e+06    2.94705e-01    9.99000e+01    

4322           +1             O4             1000           1.40000e+06    2.94705e-01    9.98000e+01    

4323           +1             O4             1000           1.45714e+06    2.94705e-01    9.98000e+01    

4324           +1             O4             1000           1.51429e+06    2.94705e-01    1.00000e+02    

4325           +1             O4             1000           1.57143e+06    2.94705e-01    9.98000e+01    

4326           +1             O4             1000           1.62857e+06    2.94705e-01    9.99000e+01    

4327           +1             O4             1000           1.68571e+06    2.94705e-01    9.97000e+01    

4328           +1             O4             1000           1.74286e+06    2.94705e-01    1.00000e+02    

4329           +1             O4             1000           1.80000e+06    2.94705e-01    1.00000e+02    

432            +1             O1             1000           1.97143e+06    2.12095e-02    0.00000e+00    

4330           +1             O4             1000           1.85714e+06    2.94705e-01    9.99000e+01    

4331           +1             O4             1000           1.91429e+06    2.94705e-01    9.99000e+01    

4332           +1             O4             1000           1.97143e+06    2.94705e-01    1.00000e+02    

4333           +1             O4             1000           2.02857e+06    2.94705e-01    1.00000e+02    

4334           +1             O4             1000           2.08571e+06    2.94705e-01    9.98000e+01    

4335           +1             O4             1000           2.14286e+06    2.94705e-01    1.00000e+02    

4336           +1             O4             1000           2.20000e+06    2.94705e-01    1.00000e+02    

4337           +1             O4             1000           2.25714e+06    2.94705e-01    1.00000e+02    

4338           +1             O4             1000           2.31429e+06    2.94705e-01    1.00000e+02    

4339           +1             O4             1000           2.37143e+06    2.94705e-01    1.00000e+02    

433            +1             O1             1000           2.02857e+06    2.12095e-02    0.00000e+00    

4340           +1             O4             1000           2.42857e+06    2.94705e-01    1.00000e+02    

4341           +1             O4             1000           2.48571e+06    2.94705e-01    1.00000e+02    

4342           +1             O4             1000           2.54286e+06    2.94705e-01    1.00000e+02    

4343           +1             O4             1000           2.60000e+06    2.94705e-01    1.00000e+02    

4344           +1             O4             1000           2.65714e+06    2.94705e-01    9.99000e+01    

4345           +1             O4             1000           2.71429e+06    2.94705e-01    1.00000e+02    

4346           +1             O4             1000           2.77143e+06    2.94705e-01    1.00000e+02    

4347           +1             O4             1000           2.82857e+06    2.94705e-01    1.00000e+02    

4348           +1             O4             1000           2.88571e+06    2.94705e-01    1.00000e+02    

4349           +1             O4             1000           2.94286e+06    2.94705e-01    1.00000e+02    

434            +1             O1             1000           2.08571e+06    2.12095e-02    0.00000e+00    

4350           +1             O4             1000           3.00000e+06    2.94705e-01    1.00000e+02    

4351           +1             O4             1000           2.00000e+05    3.23746e-01    0.00000e+00    

4352           +1             O4             1000           2.57143e+05    3.23746e-01    0.00000e+00    

4353           +1             O4             1000           3.14286e+05    3.23746e-01    2.00000e-01    

4354           +1             O4             1000           3.71429e+05    3.23746e-01    9.00000e+00    

4355           +1             O4             1000           4.28571e+05    3.23746e-01    3.63000e+01    

4356           +1             O4             1000           4.85714e+05    3.23746e-01    6.32000e+01    

4357           +1             O4             1000           5.42857e+05    3.23746e-01    8.02000e+01    

4358           +1             O4             1000           6.00000e+05    3.23746e-01    8.78000e+01    

4359           +1             O4             1000           6.57143e+05    3.23746e-01    9.38000e+01    

435            +1             O1             1000           2.14286e+06    2.12095e-02    0.00000e+00    

4360           +1             O4             1000           7.14286e+05    3.23746e-01    9.57000e+01    

4361           +1             O4             1000           7.71429e+05    3.23746e-01    9.78000e+01    

4362           +1             O4             1000           8.28571e+05    3.23746e-01    9.86000e+01    

4363           +1             O4             1000           8.85714e+05    3.23746e-01    9.93000e+01    

4364           +1             O4             1000           9.42857e+05    3.23746e-01    9.94000e+01
[truncated: 670,035 more chars]
