# Supplementary material for: Evaluation of Monte Carlo tools for high energy atmospheric physics II: relativistic runaway electron avalanches
Source: Copernicus journal article supplement (doi:10.5194/gmd-2018-119), 2018-06-14
Supplement: Supplementary file 2 [file gmd-2018-119-supplement.zip › geant4_codes/readme]

Written by D. Sarria

The codes have to be linked with the version 10.2.3 Geant4.
Seen Geant4 software licence : https://geant4.web.cern.ch/license

There are two projects :
- RREA Avalanche probability (avalanche_probabilities_prob)
- RREA avalanches characteristics
See associated pdf file "HEAP2_sm.pdf" for more information.


There is no specific documentation for these source codes, but they do not uses more complex concepts that the one presented in the Geant4 documentation (http://geant4.cern.ch/support/userdocuments.shtml) and examples (http://geant4-userdoc.web.cern.ch/geant4-userdoc/Doxygen/examples_doc/html/).
