# Supplementary material for: Evaluation of Monte Carlo tools for high energy atmospheric physics II: relativistic runaway electron avalanches
Source: Copernicus journal article supplement (doi:10.5194/gmd-2018-119), 2018-06-14
Supplement: Supplementary file 2 [file gmd-2018-119-supplement.zip › geant4_codes/RREA_characteristics/GEANT4_cluster/code/build/python_job_hexagon.sh]

#!/bin/bash
#PBS -N python_mpi_geant4_ILDAS
#PBS -A fysisk
#PBS -o /work/dsarria/G4_projects/RREA_char/GEANT4_cluster/code/build/out_file
#PBS -e /work/dsarria/G4_projects/RREA_char/GEANT4_cluster/code/build/err_file
#PBS -q normal
#PBS -M david.sarria@uib.no
#PBS -l walltime=200:00:00,mppwidth=300

module list
module load gcc/6.1.0
module load python/2.7.9-dso
module load cmake/3.5.2
module load boost/1.60.0


cd /work/dsarria/G4_projects/RREA_char/GEANT4_cluster/code/build/
aprun -B g4_script_auto_mpi.py
