# Supplementary material for: Evaluation of Monte Carlo tools for high energy atmospheric physics II: relativistic runaway electron avalanches
Source: Copernicus journal article supplement (doi:10.5194/gmd-2018-119), 2018-06-14
Supplement: Supplementary file 2 [file gmd-2018-119-supplement.zip › geant4_codes/RREA_characteristics/GEANT4_cluster/code/src/CMakeLists.txt]

#----------------------------------------------------------------------------
# Setup the project
cmake_minimum_required(VERSION 2.6 FATAL_ERROR)
set(name Base)
project(${name})

execute_process(COMMAND "source ~/.bashrc")

#----------------------------------------------------------------------------
# Find Geant4 package, activating all available UI and Vis drivers by default
# You can set WITH_GEANT4_UIVIS to OFF via the command line or ccmake/cmake-gui
# to build a batch mode only executable
#
option(WITH_GEANT4_UIVIS "Build example with Geant4 UI and Vis drivers" ON)
if(WITH_GEANT4_UIVIS)
  find_package(Geant4 REQUIRED ui_all vis_all)
else()
  find_package(Geant4 REQUIRED)
endif()

#----------------------------------------------------------------------------
# Setup Geant4 include directories and compile definitions
#
include(${Geant4_USE_FILE})

#Check here for G4ANALYSIS_USE_PLOTTER
#Use it if the environment variable is set, and the user has *not* supplied the CMake 
#command line argument. Otherwise, the argument of the command line has the priority.
if("$ENV{G4ANALYSIS_USE_PLOTTER}" AND NOT DEFINED G4ANALYSIS_USE_PLOTTER)
  set(PLOTTER_USE_DEFAULT ON)
else()
  set(PLOTTER_USE_DEFAULT ${G4ANALYSIS_USE_PLOTTER})
endif()

option(G4ANALYSIS_USE_PLOTTER "Build Base with support for Plotter"
${PLOTTER_USE_DEFAULT})
mark_as_advanced(G4ANALYSIS_USE_PLOTTER)

if(G4ANALYSIS_USE_PLOTTER)
  add_definitions(-DG4ANALYSIS_USE_PLOTTER)
endif()

#----------------------------------------------------------------------------
# Locate sources and headers for this project
#
include_directories(${PROJECT_SOURCE_DIR}/include 
                    ${Geant4_INCLUDE_DIR})
file(GLOB sources ${PROJECT_SOURCE_DIR}/src/*.cc)
file(GLOB headers ${PROJECT_SOURCE_DIR}/include/*.hh)

#----------------------------------------------------------------------------
# Add the executable, and link it to the Geant4 libraries
#
add_executable(Base Base.cc ${sources} ${headers})
target_link_libraries(Base ${Geant4_LIBRARIES} )

#----------------------------------------------------------------------------
# Add boost libraries
#
find_package(Boost REQUIRED COMPONENTS system filesystem)
if(Boost_FOUND)
  include_directories(${Boost_INCLUDE_DIRS})
  target_link_libraries(Base ${Boost_LIBRARIES})
endif()


#----------------------------------------------------------------------------
# Copy all scripts to the build directory, i.e. the directory in which we
# build Base. This is so that we can run the executable directly because it
# relies on these scripts being in the current working directory.
#
set(Base_SCRIPTS
    vis.mac
  )

foreach(_script ${Base_SCRIPTS})
  configure_file(
    ${PROJECT_SOURCE_DIR}/${_script}
    ${PROJECT_BINARY_DIR}/${_script}
    COPYONLY
    )
endforeach()

#----------------------------------------------------------------------------
# Add program to the project targets
# (this avoids the need of typing the program name after make)
#
add_custom_target(CMakeRules DEPENDS ${name})

#----------------------------------------------------------------------------
# Install the executable to 'bin' directory under CMAKE_INSTALL_PREFIX
#
install(TARGETS ${name} DESTINATION bin)
