# Supplementary material for: Evaluation of Monte Carlo tools for high energy atmospheric physics II: relativistic runaway electron avalanches
Source: Copernicus journal article supplement (doi:10.5194/gmd-2018-119), 2018-06-14
Supplement: Supplementary file 2 [file gmd-2018-119-supplement.zip › geant4_codes/RREA_characteristics/GEANT4_cluster/code/src/data/density_profile]

    5.0 7.790E-04
    5.1 7.705E-04
    5.2 7.620E-04
    5.3 7.535E-04
    5.4 7.451E-04
    5.5 7.368E-04
    5.6 7.285E-04
    5.7 7.203E-04
    5.8 7.121E-04
    5.9 7.040E-04
    6.0 6.959E-04
    6.1 6.879E-04
    6.2 6.799E-04
    6.3 6.720E-04
    6.4 6.641E-04
    6.5 6.563E-04
    6.6 6.485E-04
    6.7 6.408E-04
    6.8 6.331E-04
    6.9 6.254E-04
    7.0 6.179E-04
    7.1 6.103E-04
    7.2 6.028E-04
    7.3 5.954E-04
    7.4 5.880E-04
    7.5 5.806E-04
    7.6 5.733E-04
    7.7 5.661E-04
    7.8 5.589E-04
    7.9 5.517E-04
    8.0 5.446E-04
    8.1 5.375E-04
    8.2 5.305E-04
    8.3 5.236E-04
    8.4 5.166E-04
    8.5 5.098E-04
    8.6 5.029E-04
    8.7 4.962E-04
    8.8 4.895E-04
    8.9 4.828E-04
    9.0 4.762E-04
    9.1 4.696E-04
    9.2 4.631E-04
    9.3 4.566E-04
    9.4 4.502E-04
    9.5 4.438E-04
    9.6 4.375E-04
    9.7 4.313E-04
    9.8 4.251E-04
    9.9 4.189E-04
   10.0 4.128E-04
   10.1 4.068E-04
   10.2 4.008E-04
   10.3 3.948E-04
   10.4 3.890E-04
   10.5 3.831E-04
   10.6 3.774E-04
   10.7 3.717E-04
   10.8 3.661E-04
   10.9 3.605E-04
   11.0 3.550E-04
   11.1 3.495E-04
   11.2 3.441E-04
   11.3 3.388E-04
   11.4 3.336E-04
   11.5 3.284E-04
   11.6 3.233E-04
   11.7 3.182E-04
   11.8 3.132E-04
   11.9 3.083E-04
   12.0 3.035E-04
   12.1 2.987E-04
   12.2 2.940E-04
   12.3 2.893E-04
   12.4 2.848E-04
   12.5 2.802E-04
   12.6 2.758E-04
   12.7 2.714E-04
   12.8 2.671E-04
   12.9 2.628E-04
   13.0 2.587E-04
   13.1 2.545E-04
   13.2 2.505E-04
   13.3 2.465E-04
   13.4 2.426E-04
   13.5 2.387E-04
   13.6 2.349E-04
   13.7 2.311E-04
   13.8 2.275E-04
   13.9 2.238E-04
   14.0 2.203E-04
   14.1 2.168E-04
   14.2 2.133E-04
   14.3 2.099E-04
   14.4 2.066E-04
   14.5 2.033E-04
   14.6 2.001E-04
   14.7 1.970E-04
   14.8 1.939E-04
   14.9 1.908E-04
   15.0 1.878E-04
   15.1 1.849E-04
   15.2 1.820E-04
   15.3 1.791E-04
   15.4 1.763E-04
   15.5 1.736E-04
   15.6 1.709E-04
   15.7 1.682E-04
   15.8 1.656E-04
   15.9 1.630E-04
   16.0 1.605E-04
   16.1 1.580E-04
   16.2 1.556E-04
   16.3 1.532E-04
   16.4 1.508E-04
   16.5 1.485E-04
   16.6 1.462E-04
   16.7 1.439E-04
   16.8 1.417E-04
   16.9 1.395E-04
   17.0 1.373E-04
   17.1 1.352E-04
   17.2 1.331E-04
   17.3 1.311E-04
   17.4 1.291E-04
   17.5 1.271E-04
   17.6 1.251E-04
   17.7 1.232E-04
   17.8 1.213E-04
   17.9 1.194E-04
   18.0 1.175E-04
   18.1 1.157E-04
   18.2 1.139E-04
   18.3 1.122E-04
   18.4 1.104E-04
   18.5 1.087E-04
   18.6 1.070E-04
   18.7 1.053E-04
   18.8 1.037E-04
   18.9 1.021E-04
   19.0 1.005E-04
   19.1 9.891E-05
   19.2 9.736E-05
   19.3 9.583E-05
   19.4 9.432E-05
   19.5 9.284E-05
   19.6 9.138E-05
   19.7 8.993E-05
   19.8 8.851E-05
   19.9 8.711E-05
