# Supplementary material for: Evaluation of Monte Carlo tools for high energy atmospheric physics II: relativistic runaway electron avalanches
Source: Copernicus journal article supplement (doi:10.5194/gmd-2018-119), 2018-06-14
Supplement: Supplementary file 2 [file gmd-2018-119-supplement.zip › geant4_codes/RREA_characteristics/GEANT4_cluster/code/src/include/BasePhysicsList.hh]

#pragma once


#include "G4SystemOfUnits.hh"
#include "G4VUserPhysicsList.hh"
#include "Settings.hh"

class G4VPhysicsConstructor;

class BasePhysicsList: public G4VUserPhysicsList
{
    public:

        BasePhysicsList();
        ~BasePhysicsList();

        void SetCuts();
        void ConstructParticle();
        void ConstructProcess();

    private:

        G4double cutForGamma;
        G4double cutForElectron;
        G4double cutForPositron;

        G4VPhysicsConstructor *emPhysicsList;
        G4VPhysicsConstructor *radDecPhysicsList;

        void AddStepMax(G4double stepMax_elec, G4double stepMax_phot);
};
