# Supplementary material for: Evaluation of Monte Carlo tools for high energy atmospheric physics II: relativistic runaway electron avalanches
Source: Copernicus journal article supplement (doi:10.5194/gmd-2018-119), 2018-06-14
Supplement: Supplementary file 2 [file gmd-2018-119-supplement.zip › geant4_codes/RREA_characteristics/GEANT4_cluster/code/src/include/G4ElectronCapture.hh]

//

// ********************************************************************
// * License and Disclaimer                                           *
// *                                                                  *
// * The  Geant4 software  is  copyright of the Copyright Holders  of *
// * the Geant4 Collaboration.  It is provided  under  the terms  and *
// * conditions of the Geant4 Software License,  included in the file *
// * LICENSE and available at  http://cern.ch/geant4/license .  These *
// * include a list of copyright holders.                             *
// *                                                                  *
// * Neither the authors of this software system, nor their employing *
// * institutes,nor the agencies providing financial support for this *
// * work  make  any representation or  warranty, express or implied, *
// * regarding  this  software system or assume any liability for its *
// * use.  Please see the license in the file  LICENSE  and URL above *
// * for the full disclaimer and the limitation of liability.         *
// *                                                                  *
// * This  code  implementation is the result of  the  scientific and *
// * technical work of the GEANT4 collaboration.                      *
// * By using,  copying,  modifying or  distributing the software (or *
// * any work based  on the software)  you  agree  to acknowledge its *
// * use  in  resulting  scientific  publications,  and indicate your *
// * acceptance of all terms of the Geant4 Software license.          *
// ********************************************************************
//
// This example is provided by the Geant4-DNA collaboration
// Any report or published results obtained using the Geant4-DNA software
// shall cite the following Geant4-DNA collaboration publication:
// Med. Phys. 37 (2010) 4692-4708
// The Geant4-DNA web site is available at http://geant4-dna.org
//
// ---------------------------------------------------------------------------
//
// ClassName:   G4ElectronCapture
//
// Description: The process to kill e- to save CPU
//
// Author:      V.Ivanchenko 31 August 2010
//
// ----------------------------------------------------------------------------
//
// Class description:
//
// G4ElectronCapture allows to remove unwanted e- from simulation in
// order to improve CPU performance. There are two parameters:
//
// 1) low energy threshold for e- kinetic energy (default 0)
// 2) the name of G4Region where process is active
//
//
// If an electron track is killed then energy deposition is added to the step
//
// $ID$
/// \file G4ElectronCapture.hh
/// \brief Definition of the G4ElectronCapture class

#pragma once

#include "G4VDiscreteProcess.hh"
#include "globals.hh"
#include "G4ParticleChangeForGamma.hh"

class G4Region;

// ....oooOO0OOooo........oooOO0OOooo........oooOO0OOooo........oooOO0OOooo......

class G4ElectronCapture: public G4VDiscreteProcess
{
    public:

        G4ElectronCapture(const G4String &regName, G4double ekinlimit);

        virtual ~G4ElectronCapture();

        void             SetKinEnergyLimit(G4double);

        virtual void     BuildPhysicsTable(const G4ParticleDefinition &);

        virtual G4bool   IsApplicable(const G4ParticleDefinition &);

        virtual G4double PostStepGetPhysicalInteractionLength(const G4Track    &track,
                G4double          previousStepSize,
                G4ForceCondition *condition);

        virtual G4VParticleChange *PostStepDoIt(const G4Track &,
                                                const G4Step &);

    protected:

        virtual G4double GetMeanFreePath(const G4Track &,
                                         G4double,
                                         G4ForceCondition *);

    private:

        // hide assignment operator as private
        G4ElectronCapture(const G4ElectronCapture &);
        G4ElectronCapture &operator = (const G4ElectronCapture &right);

        G4double  fKinEnergyThreshold;
        G4String  fRegionName;
        G4Region *fpRegion;
        G4ParticleChangeForGamma fParticleChange;
};

// ....oooOO0OOooo........oooOO0OOooo........oooOO0OOooo........oooOO0OOooo......
