# Supplementary material for: Evaluation of Monte Carlo tools for high energy atmospheric physics II: relativistic runaway electron avalanches
Source: Copernicus journal article supplement (doi:10.5194/gmd-2018-119), 2018-06-14
Supplement: Supplementary file 2 [file gmd-2018-119-supplement.zip › geant4_codes/RREA_characteristics/GEANT4_cluster/code/src/include/Settings.hh]

#pragma once

// ....oooOO0OOooo........oooOO0OOooo........oooOO0OOooo........oooOO0OOooo......
namespace Settings
{
    // All these variables are put here to be shared amounts source files
    // (not very c++ but easier to implement)

    extern G4double ENER_THRES; // eV
    extern G4String PHYSLIST;

    extern int NB_LAUNCHED; // initialization
    extern int Rand_seed;
    extern double MIN_STEP;   // um
    extern double PRIMARY_ENERGY;  // MeV
    extern double LOG10_EPSTOL;
    extern double EFIELD; // V/m
    extern int TYPE;                // chosen value
    extern double TIME_LIMIT;
    extern const double EF_SIGN;
    extern G4double DR_OVER_R;
    extern G4double STEP_MAX;
}
