# Supplementary material for: Evaluation of Monte Carlo tools for high energy atmospheric physics II: relativistic runaway electron avalanches
Source: Copernicus journal article supplement (doi:10.5194/gmd-2018-119), 2018-06-14
Supplement: Supplementary file 2 [file gmd-2018-119-supplement.zip › geant4_codes/RREA_characteristics/GEANT4_cluster/code/src/include/StepMax.hh]

//
// ********************************************************************
// * License and Disclaimer                                           *
// *                                                                  *
// * The  Geant4 software  is  copyright of the Copyright Holders  of *
// * the Geant4 Collaboration.  It is provided  under  the terms  and *
// * conditions of the Geant4 Software License,  included in the file *
// * LICENSE and available at  http://cern.ch/geant4/license .  These *
// * include a list of copyright holders.                             *
// *                                                                  *
// * Neither the authors of this software system, nor their employing *
// * institutes,nor the agencies providing financial support for this *
// * work  make  any representation or  warranty, express or implied, *
// * regarding  this  software system or assume any liability for its *
// * use.  Please see the license in the file  LICENSE  and URL above *
// * for the full disclaimer and the limitation of liability.         *
// *                                                                  *
// * This  code  implementation is the result of  the  scientific and *
// * technical work of the GEANT4 collaboration.                      *
// * By using,  copying,  modifying or  distributing the software (or *
// * any work based  on the software)  you  agree  to acknowledge its *
// * use  in  resulting  scientific  publications,  and indicate your *
// * acceptance of all terms of the Geant4 Software license.          *
// ********************************************************************
//
/// \file electromagnetic/TestEm1/include/StepMax.hh
/// \brief Definition of the StepMax class
//
// $Id: StepMax.hh 66241 2012-12-13 18:34:42Z gunter $
//
//....oooOO0OOooo........oooOO0OOooo........oooOO0OOooo........oooOO0OOooo......
//....oooOO0OOooo........oooOO0OOooo........oooOO0OOooo........oooOO0OOooo......

#pragma once

#include "globals.hh"
#include "G4VDiscreteProcess.hh"
#include "G4ParticleDefinition.hh"
#include "G4Step.hh"

class StepMaxMessenger;

//....oooOO0OOooo........oooOO0OOooo........oooOO0OOooo........oooOO0OOooo......

class StepMax : public G4VDiscreteProcess
{
    public:

        StepMax(const G4String &processName = "UserMaxStep");
        ~StepMax();

        virtual G4bool IsApplicable(const G4ParticleDefinition &);

        void SetMaxStep(G4double);

        G4double GetMaxStep()
        {
            return fMaxChargedStep;
        }

        virtual G4double PostStepGetPhysicalInteractionLength(const G4Track &track,
                G4double previousStepSize,
                G4ForceCondition *condition);

        virtual G4VParticleChange *PostStepDoIt(const G4Track &, const G4Step &);

        virtual G4double GetMeanFreePath(const G4Track &, G4double, G4ForceCondition *)
        {
            return DBL_MAX;
        }

    private:

        G4double fMaxChargedStep;

};

//....oooOO0OOooo........oooOO0OOooo........oooOO0OOooo........oooOO0OOooo......
