# Supplementary material for: Evaluation of Monte Carlo tools for high energy atmospheric physics II: relativistic runaway electron avalanches
Source: Copernicus journal article supplement (doi:10.5194/gmd-2018-119), 2018-06-14
Supplement: Supplementary file 2 [file gmd-2018-119-supplement.zip › geant4_codes/RREA_characteristics/GEANT4_cluster/code/src/src/BaseEventAction.cc]

//

// ********************************************************************
// * License and Disclaimer                                           *
// *                                                                  *
// * The  Geant4 software  is  copyright of the Copyright Holders  of *
// * the Geant4 Collaboration.  It is provided  under  the terms  and *
// * conditions of the Geant4 Software License,  included in the file *
// * LICENSE and available at  http://cern.ch/geant4/license .  These *
// * include a list of copyright holders.                             *
// *                                                                  *
// * Neither the authors of this software system, nor their employing *
// * institutes,nor the agencies providing financial support for this *
// * work  make  any representation or  warranty, express or implied, *
// * regarding  this  software system or assume any liability for its *
// * use.  Please see the license in the file  LICENSE  and URL above *
// * for the full disclaimer and the limitation of liability.         *
// *                                                                  *
// * This  code  implementation is the result of  the  scientific and *
// * technical work of the GEANT4 collaboration.                      *
// * By using,  copying,  modifying or  distributing the software (or *
// * any work based  on the software)  you  agree  to acknowledge its *
// * use  in  resulting  scientific  publications,  and indicate your *
// * acceptance of all terms of the Geant4 Software license.          *
// ********************************************************************

// ....oooOO0OOooo........oooOO0OOooo........oooOO0OOooo........oooOO0OOooo....

#include "BaseEventAction.hh"

#include "BaseRunAction.hh"

#include "G4Event.hh"
#include "G4EventManager.hh"

#include "BaseAnalysisManager.hh"


// ....oooOO0OOooo........oooOO0OOooo........oooOO0OOooo........oooOO0OOooo....

BaseEventAction::BaseEventAction()
    : drawFlag("all"), printModulo(1)
{}

// ....oooOO0OOooo........oooOO0OOooo........oooOO0OOooo........oooOO0OOooo....

BaseEventAction::~BaseEventAction()
{}

// ....oooOO0OOooo........oooOO0OOooo........oooOO0OOooo........oooOO0OOooo....

void BaseEventAction::BeginOfEventAction(const G4Event *evt)
{
    //     G4int evtNb = evt->GetEventID();
    Settings::NB_LAUNCHED++;


    // Display particle counter
    //    G4int evtNb = evt->GetEventID();

    //  if (evtNb%printModulo == 0)
    //    G4cout << "\n---> Begin Of Event: " << evtNb << G4endl;
}

// ....oooOO0OOooo........oooOO0OOooo........oooOO0OOooo........oooOO0OOooo....

void BaseEventAction::EndOfEventAction(const G4Event *)
{}

// ....oooOO0OOooo........oooOO0OOooo........oooOO0OOooo........oooOO0OOooo....
