# Supplementary material for: Evaluation of Monte Carlo tools for high energy atmospheric physics II: relativistic runaway electron avalanches
Source: Copernicus journal article supplement (doi:10.5194/gmd-2018-119), 2018-06-14
Supplement: Supplementary file 2 [file gmd-2018-119-supplement.zip › geant4_codes/RREA_characteristics/GEANT4_cluster/code/src/src/BasePhysicsList.cc]

#include "BasePhysicsList.hh"
#include "G4EmStandardPhysics_option4.hh"
#include "G4EmStandardPhysics_option3.hh"
#include "G4EmStandardPhysics_option2.hh"
#include "G4EmStandardPhysics_option1.hh"

#include "G4EmStandardPhysics_option1_dr.hh"
#include "G4EmStandardPhysics_option4_dr.hh"

#include "G4EmLivermorePhysics.hh"
#include "G4EmLivermorePolarizedPhysics.hh"
#include "G4EmPenelopePhysics.hh"
#include "G4ProductionCutsTable.hh"
#include "G4EmLowEPPhysics.hh"

#include "G4EmStandardPhysicsWVI.hh"

#include "G4Material.hh"
#include "G4Element.hh"
#include "G4EmStandardPhysicsGS.hh"
#include "G4EmStandardPhysicsSS.hh"

#include "G4RadioactiveDecay.hh"
#include "G4NeutrinoE.hh"
#include "G4AntiNeutrinoE.hh"
#include "G4Alpha.hh"
#include "G4GenericIon.hh"
#include "G4PhysicsListHelper.hh"
#include "G4UnitsTable.hh"
#include "G4EmParameters.hh"

#include "G4EmCalculator.hh"
#include "G4Electron.hh"

#include "BaseDetectorConstruction.hh"


// ....oooOO0OOooo........oooOO0OOooo........oooOO0OOooo........oooOO0OOooo....

BasePhysicsList::BasePhysicsList() : G4VUserPhysicsList()
{
    defaultCutValue = 1. * nm;
    cutForElectron  = 1. * nm;
    cutForPositron  = 1. * nm;
    cutForGamma     = 1. * nm;

    G4cout << "Using " << Settings::PHYSLIST << " physics list" << G4endl;

    G4String PHYSLIST = Settings::PHYSLIST;

    if (PHYSLIST == "O4")
        {
            emPhysicsList = new G4EmStandardPhysics_option4_dr();
        }
    else if (PHYSLIST == "LIV")
        {
            emPhysicsList = new G4EmLivermorePhysics();
        }
    else if (PHYSLIST == "PEN")
        {
            emPhysicsList = new G4EmPenelopePhysics();
        }
    else if (PHYSLIST == "LIVPOLAR")
        {
            emPhysicsList = new G4EmLivermorePolarizedPhysics();
        }
    else if (PHYSLIST == "O3")
        {
            emPhysicsList = new G4EmStandardPhysics_option3();
        }
    else if (PHYSLIST == "O2")
        {
            emPhysicsList = new G4EmStandardPhysics_option2();
        }
    else if (PHYSLIST == "O1")
        {
            emPhysicsList = new G4EmStandardPhysics_option1_dr();
        }
    else if (PHYSLIST == "LEP")
        {
            emPhysicsList = new G4EmLowEPPhysics();
        }
    else if (PHYSLIST == "GS")
        {
            emPhysicsList = new G4EmStandardPhysicsGS();
        }
    else if (PHYSLIST == "SS")
        {
            emPhysicsList = new G4EmStandardPhysicsSS();
        }
    else if (PHYSLIST == "WVI")
        {
            emPhysicsList = new G4EmStandardPhysicsWVI();
        }
    else
        {
            G4cout << "WRONG PHYSICS LIST NAME" << G4endl;
            std::abort();
        }

    this->DumpCutValuesTable();
}

// ....oooOO0OOooo........oooOO0OOooo........oooOO0OOooo........oooOO0OOooo....

BasePhysicsList::~BasePhysicsList()
{
    delete emPhysicsList;
}

// ....oooOO0OOooo........oooOO0OOooo........oooOO0OOooo........oooOO0OOooo....

void BasePhysicsList::ConstructParticle()
{
    emPhysicsList->ConstructParticle();
}

// ....oooOO0OOooo........oooOO0OOooo........oooOO0OOooo........oooOO0OOooo....

void BasePhysicsList::ConstructProcess()
{
    AddTransportation();
    emPhysicsList->ConstructProcess();

    if (Settings::PHYSLIST == "SS")
        {
            AddStepMax(Settings::STEP_MAX, 0.5 * meter); // arguments are for electrons and photons
            // this max step is to ensure good record for photons
        }
}

// ....oooOO0OOooo........oooOO0OOooo........oooOO0OOooo........oooOO0OOooo....

void BasePhysicsList::SetCuts()
{
    SetCutValue(cutForGamma,    "gamma");
    SetCutValue(cutForElectron, "e-");
    SetCutValue(cutForPositron, "e+");

    // special for low energy physics
    //    G4double lowlimit=250*CLHEP::eV;
    //    G4ProductionCutsTable * aPCTable =
    // G4ProductionCutsTable::GetProductionCutsTable();
    //    aPCTable->SetEnergyRange(lowlimit,100*CLHEP::GeV);

    //     SetCutsWithDefault();

    G4EmParameters *param = G4EmParameters::Instance();
    //


    if (Settings::ENER_THRES != 990.)
        {
            G4double lowlimit = Settings::ENER_THRES * CLHEP::eV;
            G4ProductionCutsTable *aPCTable = G4ProductionCutsTable::GetProductionCutsTable();
            aPCTable->SetEnergyRange(lowlimit, 1000. * CLHEP::MeV);
        }

    //    param->SetMaxEnergy(1000. * CLHEP::MeV);

    //    param->SetNumberOfBinsPerDecade(30);

    if (Settings::PHYSLIST == "SS")
        {
            param->SetUseMottCorrection(true);
        }

    //   param->SetMinEnergy(250. * CLHEP::eV);
    //   param->SetLowestElectronEnergy(ENERGY_THRES*CLHEP::eV);
    //   param->SetMscRangeFactor(0.005);
    //   param->SetFluo(true);
    //   param->SetAuger(true);
    //   param->SetPixe(true);
    //   param->SetPIXEElectronCrossSectionModel("Penelope");
    //   param->SetLateralDisplacement(true);
    //   param->ActivateAngularGeneratorForIonisation(true);
}


// ....oooOO0OOooo........oooOO0OOooo........oooOO0OOooo........oooOO0OOooo....

#include "G4ProcessManager.hh"
#include "StepMax.hh"

void BasePhysicsList::AddStepMax(G4double stepMax_elec, G4double stepMax_phot)
{
    // Step limitation seen as a process
    StepMax *stepMaxProcess_elec = new StepMax();
    stepMaxProcess_elec->SetMaxStep(stepMax_elec);

    StepMax *stepMaxProcess_phot = new StepMax();
    stepMaxProcess_phot->SetMaxStep(stepMax_phot);


    auto particleIterator = GetParticleIterator();
    particleIterator->reset();

    while ((*particleIterator)())
        {
            G4ParticleDefinition *particle = particleIterator->value();
            G4ProcessManager *pmanager = particle->GetProcessManager();

            if (stepMaxProcess_elec->IsApplicable(*particle))
                {
                    if (particle->GetParticleName() == "gamma")
                        {
                            pmanager ->AddDiscreteProcess(stepMaxProcess_phot);
                        }
                    else
                        {
                            pmanager ->AddDiscreteProcess(stepMaxProcess_elec);
                        }
                }
        }
}
