# Supplementary material for: Evaluation of Monte Carlo tools for high energy atmospheric physics II: relativistic runaway electron avalanches
Source: Copernicus journal article supplement (doi:10.5194/gmd-2018-119), 2018-06-14
Supplement: Supplementary file 2 [file gmd-2018-119-supplement.zip › geant4_codes/RREA_characteristics/GEANT4_cluster/code/src/src/BaseRunAction.cc]

#include "BaseRunAction.hh"

#include "G4Run.hh"
#include "G4UnitsTable.hh"
#include "G4SystemOfUnits.hh"
#include "Randomize.hh"

#include "G4UnitsTable.hh"
#include "G4Element.hh"
#include "G4Material.hh"
#include "G4ParticleTable.hh"
#include "G4EmCalculator.hh"

#include <time.h>
#include <sys/time.h>


BaseRunAction::BaseRunAction()
{
    saveRndm = 1;

}

BaseRunAction::~BaseRunAction()
{}


void   BaseRunAction::BeginOfRunAction(const G4Run *)
{}

void   BaseRunAction::EndOfRunAction(const G4Run *)
{

    analysis->write_output_endOfRun();

}
