# Supplementary material for: Evaluation of Monte Carlo tools for high energy atmospheric physics II: relativistic runaway electron avalanches
Source: Copernicus journal article supplement (doi:10.5194/gmd-2018-119), 2018-06-14
Supplement: Supplementary file 2 [file gmd-2018-119-supplement.zip › geant4_codes/RREA_characteristics/GEANT4_cluster/code/src/src/G4EmStandardPhysics_option1_dr.cc]

//
// ********************************************************************
// * License and Disclaimer                                           *
// *                                                                  *
// * The  Geant4 software  is  copyright of the Copyright Holders  of *
// * the Geant4 Collaboration.  It is provided  under  the terms  and *
// * conditions of the Geant4 Software License,  included in the file *
// * LICENSE and available at  http://cern.ch/geant4/license .  These *
// * include a list of copyright holders.                             *
// *                                                                  *
// * Neither the authors of this software system, nor their employing *
// * institutes,nor the agencies providing financial support for this *
// * work  make  any representation or  warranty, express or implied, *
// * regarding  this  software system or assume any liability for its *
// * use.  Please see the license in the file  LICENSE  and URL above *
// * for the full disclaimer and the limitation of liability.         *
// *                                                                  *
// * This  code  implementation is the result of  the  scientific and *
// * technical work of the GEANT4 collaboration.                      *
// * By using,  copying,  modifying or  distributing the software (or *
// * any work based  on the software)  you  agree  to acknowledge its *
// * use  in  resulting  scientific  publications,  and indicate your *
// * acceptance of all terms of the Geant4 Software license.          *
// ********************************************************************
//
// $Id: G4EmStandardPhysics_option1_dr.cc 102321 2017-01-23 09:51:59Z gcosmo $
//
//---------------------------------------------------------------------------
//
// ClassName:   G4EmStandardPhysics_option1_dr
//
// Author:      V.Ivanchenko 09.11.2005
//
// Modified:
// 19.12.2005 V.Ivanchenko StepFunction for electrons (1.0, 1.0*mm)
// 21.06.2006 V.Ivanchenko use recent msc with step limitation off
// 23.06.2006 V.Ivanchenko set dRoverRange = 0.8 for e- and e+
// 13.11.2006 V.Ivanchenko use G4hMultipleScattering
// 23.11.2006 V.Ivanchenko remove mscStepLimit option and improve cout
// 13.02.2007 V.Ivanchenko set skin=0.0
// 15.05.2007 V.Ivanchenko rename to _option1
// 21.04.2008 V.Ivanchenko add long-lived D and B mesons
// 19.11.2010 V.Ivanchenko added WentzelVI model for muons;
//                         disable ApplyCut option for compatibility with 9.2
//
//----------------------------------------------------------------------------
//

#include "G4EmStandardPhysics_option1_dr.hh"
#include "G4SystemOfUnits.hh"
#include "G4ParticleDefinition.hh"
#include "G4LossTableManager.hh"
#include "G4EmParameters.hh"

#include "G4ComptonScattering.hh"
#include "G4GammaConversion.hh"
#include "G4PhotoElectricEffect.hh"

#include "G4eMultipleScattering.hh"
#include "G4MuMultipleScattering.hh"
#include "G4hMultipleScattering.hh"
#include "G4eCoulombScatteringModel.hh"
#include "G4CoulombScattering.hh"
#include "G4WentzelVIModel.hh"
#include "G4UrbanMscModel.hh"

#include "G4eIonisation.hh"
#include "G4eBremsstrahlung.hh"
#include "G4eplusAnnihilation.hh"
#include "G4UAtomicDeexcitation.hh"

#include "G4MuIonisation.hh"
#include "G4MuBremsstrahlung.hh"
#include "G4MuPairProduction.hh"
#include "G4hBremsstrahlung.hh"
#include "G4hPairProduction.hh"

#include "G4MuBremsstrahlungModel.hh"
#include "G4MuPairProductionModel.hh"
#include "G4hBremsstrahlungModel.hh"
#include "G4hPairProductionModel.hh"

#include "G4hIonisation.hh"
#include "G4ionIonisation.hh"
#include "G4alphaIonisation.hh"

#include "G4Gamma.hh"
#include "G4Electron.hh"
#include "G4Positron.hh"
#include "G4MuonPlus.hh"
#include "G4MuonMinus.hh"
#include "G4PionPlus.hh"
#include "G4PionMinus.hh"
#include "G4KaonPlus.hh"
#include "G4KaonMinus.hh"
#include "G4Proton.hh"
#include "G4AntiProton.hh"
#include "G4Deuteron.hh"
#include "G4Triton.hh"
#include "G4He3.hh"
#include "G4Alpha.hh"
#include "G4GenericIon.hh"

#include "G4PhysicsListHelper.hh"
#include "G4BuilderType.hh"
#include "G4EmModelActivator.hh"

// factory
#include "G4PhysicsConstructorFactory.hh"
//
//G4_DECLARE_PHYSCONSTR_FACTORY(G4EmStandardPhysics_option1_dr);

//....oooOO0OOooo........oooOO0OOooo........oooOO0OOooo........oooOO0OOooo......

G4EmStandardPhysics_option1_dr::G4EmStandardPhysics_option1_dr(G4int ver)
    : G4VPhysicsConstructor("G4EmStandard_opt1"), verbose(ver)
{
    G4EmParameters *param = G4EmParameters::Instance();
    param->SetDefaults();
    param->SetVerbose(verbose);
    param->SetApplyCuts(true);
    param->SetMscRangeFactor(0.2);
    param->SetMscStepLimitType(fMinimal);
    SetPhysicsType(bElectromagnetic);
}

//....oooOO0OOooo........oooOO0OOooo........oooOO0OOooo........oooOO0OOooo......

G4EmStandardPhysics_option1_dr::G4EmStandardPhysics_option1_dr(G4int ver,
        const G4String &)
    : G4VPhysicsConstructor("G4EmStandard_opt1"), verbose(ver)
{
    G4EmParameters *param = G4EmParameters::Instance();
    param->SetDefaults();
    param->SetVerbose(verbose);
    param->SetApplyCuts(true);
    param->SetMscRangeFactor(0.1);
    param->SetMscStepLimitType(fUseSafetyPlus);
    SetPhysicsType(bElectromagnetic);
}

//....oooOO0OOooo........oooOO0OOooo........oooOO0OOooo........oooOO0OOooo......

G4EmStandardPhysics_option1_dr::~G4EmStandardPhysics_option1_dr()
{}

//....oooOO0OOooo........oooOO0OOooo........oooOO0OOooo........oooOO0OOooo......

void G4EmStandardPhysics_option1_dr::ConstructParticle()
{
    // gamma
    G4Gamma::Gamma();

    // leptons
    G4Electron::Electron();
    G4Positron::Positron();
    G4MuonPlus::MuonPlus();
    G4MuonMinus::MuonMinus();

    // mesons
    G4PionPlus::PionPlusDefinition();
    G4PionMinus::PionMinusDefinition();
    G4KaonPlus::KaonPlusDefinition();
    G4KaonMinus::KaonMinusDefinition();

    // barions
    G4Proton::Proton();
    G4AntiProton::AntiProton();

    // ions
    G4Deuteron::Deuteron();
    G4Triton::Triton();
    G4He3::He3();
    G4Alpha::Alpha();
    G4GenericIon::GenericIonDefinition();

    // dna
    G4EmModelActivator mact;
    mact.ConstructParticle();
}

//....oooOO0OOooo........oooOO0OOooo........oooOO0OOooo........oooOO0OOooo......

void G4EmStandardPhysics_option1_dr::ConstructProcess()
{
    if (verbose > 1)
        {
            G4cout << "### " << GetPhysicsName() << " Construct Processes " << G4endl;
        }

    G4PhysicsListHelper *ph = G4PhysicsListHelper::GetPhysicsListHelper();

    // muon & hadron bremsstrahlung and pair production
    G4MuBremsstrahlung *mub = new G4MuBremsstrahlung();
    G4MuPairProduction *mup = new G4MuPairProduction();
    G4hBremsstrahlung *pib = new G4hBremsstrahlung();
    G4hPairProduction *pip = new G4hPairProduction();
    G4hBremsstrahlung *kb = new G4hBremsstrahlung();
    G4hPairProduction *kp = new G4hPairProduction();
    G4hBremsstrahlung *pb = new G4hBremsstrahlung();
    G4hPairProduction *pp = new G4hPairProduction();

    // muon & hadron multiple scattering
    G4MuMultipleScattering *mumsc = new G4MuMultipleScattering();
    mumsc->AddEmModel(0, new G4WentzelVIModel());
    G4CoulombScattering *muss = new G4CoulombScattering();

    G4MuMultipleScattering *pimsc = new G4MuMultipleScattering();
    pimsc->AddEmModel(0, new G4WentzelVIModel());
    G4CoulombScattering *piss = new G4CoulombScattering();

    G4MuMultipleScattering *kmsc = new G4MuMultipleScattering();
    kmsc->AddEmModel(0, new G4WentzelVIModel());
    G4CoulombScattering *kss = new G4CoulombScattering();

    G4MuMultipleScattering *pmsc = new G4MuMultipleScattering();
    pmsc->AddEmModel(0, new G4WentzelVIModel());
    G4CoulombScattering *pss = new G4CoulombScattering();

    G4hMultipleScattering *hmsc = new G4hMultipleScattering("ionmsc");

    // high energy limit for e+- scattering models and bremsstrahlung
    G4double highEnergyLimit = 100 * MeV;

    // Add standard EM Processes
    auto myParticleIterator = GetParticleIterator();
    myParticleIterator->reset();

    while ((*myParticleIterator)())
        {
            G4ParticleDefinition *particle = myParticleIterator->value();
            G4String particleName = particle->GetParticleName();

            if (particleName == "gamma")
                {

                    ph->RegisterProcess(new G4PhotoElectricEffect(), particle);
                    ph->RegisterProcess(new G4ComptonScattering(), particle);
                    ph->RegisterProcess(new G4GammaConversion(), particle);

                }
            else if (particleName == "e-")
                {

                    G4eIonisation *eioni = new G4eIonisation();
                    eioni->SetStepFunction(Settings::DR_OVER_R, 1.0 * mm);

                    G4eMultipleScattering *msc = new G4eMultipleScattering;
                    G4UrbanMscModel *msc1 = new G4UrbanMscModel();
                    G4WentzelVIModel *msc2 = new G4WentzelVIModel();
                    msc1->SetNewDisplacementFlag(false);
                    msc1->SetHighEnergyLimit(highEnergyLimit);
                    msc2->SetLowEnergyLimit(highEnergyLimit);
                    msc->AddEmModel(0, msc1);
                    msc->AddEmModel(0, msc2);

                    G4eCoulombScatteringModel *ssm = new G4eCoulombScatteringModel();
                    G4CoulombScattering *ss = new G4CoulombScattering();
                    ss->SetEmModel(ssm, 1);
                    ss->SetMinKinEnergy(highEnergyLimit);
                    ssm->SetLowEnergyLimit(highEnergyLimit);
                    ssm->SetActivationLowEnergyLimit(highEnergyLimit);

                    ph->RegisterProcess(msc, particle);
                    ph->RegisterProcess(eioni, particle);
                    ph->RegisterProcess(new G4eBremsstrahlung(), particle);
                    ph->RegisterProcess(ss, particle);

                }
            else if (particleName == "e+")
                {

                    G4eIonisation *eioni = new G4eIonisation();
                    eioni->SetStepFunction(Settings::DR_OVER_R, 1.0 * mm);

                    G4eMultipleScattering *msc = new G4eMultipleScattering;
                    G4UrbanMscModel *msc1 = new G4UrbanMscModel();
                    G4WentzelVIModel *msc2 = new G4WentzelVIModel();
                    msc1->SetNewDisplacementFlag(false);
                    msc1->SetHighEnergyLimit(highEnergyLimit);
                    msc2->SetLowEnergyLimit(highEnergyLimit);
                    msc->AddEmModel(0, msc1);
                    msc->AddEmModel(0, msc2);

                    G4eCoulombScatteringModel *ssm = new G4eCoulombScatteringModel();
                    G4CoulombScattering *ss = new G4CoulombScattering();
                    ss->SetEmModel(ssm, 1);
                    ss->SetMinKinEnergy(highEnergyLimit);
                    ssm->SetLowEnergyLimit(highEnergyLimit);
                    ssm->SetActivationLowEnergyLimit(highEnergyLimit);

                    ph->RegisterProcess(msc, particle);
                    ph->RegisterProcess(eioni, particle);
                    ph->RegisterProcess(new G4eBremsstrahlung(), particle);
                    ph->RegisterProcess(new G4eplusAnnihilation(), particle);
                    ph->RegisterProcess(ss, particle);

                }
            else if (particleName == "mu+" ||
                     particleName == "mu-")
                {

                    ph->RegisterProcess(mumsc, particle);
                    ph->RegisterProcess(new G4MuIonisation(), particle);
                    ph->RegisterProcess(mub, particle);
                    ph->RegisterProcess(mup, particle);
                    ph->RegisterProcess(muss, particle);

                }
            else if (particleName == "alpha" ||
                     particleName == "He3")
                {

                    //ph->RegisterProcess(hmsc, particle);
                    ph->RegisterProcess(new G4hMultipleScattering(), particle);
                    ph->RegisterProcess(new G4ionIonisation(), particle);

                }
            else if (particleName == "GenericIon")
                {

                    ph->RegisterProcess(hmsc, particle);
                    ph->RegisterProcess(new G4ionIonisation(), particle);

                }
            else if (particleName == "pi+" ||
                     particleName == "pi-")
                {

                    //G4hMultipleScattering* pimsc = new G4hMultipleScattering();
                    ph->RegisterProcess(pimsc, particle);
                    ph->RegisterProcess(new G4hIonisation(), particle);
                    ph->RegisterProcess(pib, particle);
                    ph->RegisterProcess(pip, particle);
                    ph->RegisterProcess(piss, particle);

                }
            else if (particleName == "kaon+" ||
                     particleName == "kaon-")
                {

                    //G4hMultipleScattering* kmsc = new G4hMultipleScattering();
                    ph->RegisterProcess(kmsc, particle);
                    ph->RegisterProcess(new G4hIonisation(), particle);
                    ph->RegisterProcess(kb, particle);
                    ph->RegisterProcess(kp, particle);
                    ph->RegisterProcess(kss, particle);

                    //    } else if (particleName == "proton" ) {
                }
            else if (particleName == "proton" ||
                     particleName == "anti_proton")
                {

                    //G4hMultipleScattering* pmsc = new G4hMultipleScattering();
                    ph->RegisterProcess(pmsc, particle);
                    ph->RegisterProcess(new G4hIonisation(), particle);
                    ph->RegisterProcess(pb, particle);
                    ph->RegisterProcess(pp, particle);
                    ph->RegisterProcess(pss, particle);

                }
            else if (particleName == "B+" ||
                     particleName == "B-" ||
                     particleName == "D+" ||
                     particleName == "D-" ||
                     particleName == "Ds+" ||
                     particleName == "Ds-" ||
                     particleName == "anti_He3" ||
                     particleName == "anti_alpha" ||
                     particleName == "anti_deuteron" ||
                     particleName == "anti_lambda_c+" ||
                     particleName == "anti_omega-" ||
                     particleName == "anti_sigma_c+" ||
                     particleName == "anti_sigma_c++" ||
                     particleName == "anti_sigma+" ||
                     particleName == "anti_sigma-" ||
                     particleName == "anti_triton" ||
                     particleName == "anti_xi_c+" ||
                     particleName == "anti_xi-" ||
                     particleName == "deuteron" ||
                     particleName == "lambda_c+" ||
                     particleName == "omega-" ||
                     particleName == "sigma_c+" ||
                     particleName == "sigma_c++" ||
                     particleName == "sigma+" ||
                     particleName == "sigma-" ||
                     particleName == "tau+" ||
                     particleName == "tau-" ||
                     particleName == "triton" ||
                     particleName == "xi_c+" ||
                     particleName == "xi-")
                {

                    ph->RegisterProcess(hmsc, particle);
                    ph->RegisterProcess(new G4hIonisation(), particle);
                }
        }

    // Deexcitation
    //
    G4VAtomDeexcitation *de = new G4UAtomicDeexcitation();
    G4LossTableManager::Instance()->SetAtomDeexcitation(de);

    G4EmModelActivator mact;
    mact.ConstructProcess();
}

//....oooOO0OOooo........oooOO0OOooo........oooOO0OOooo........oooOO0OOooo......
