# Supplementary material for: Evaluation of Monte Carlo tools for high energy atmospheric physics II: relativistic runaway electron avalanches
Source: Copernicus journal article supplement (doi:10.5194/gmd-2018-119), 2018-06-14
Supplement: Supplementary file 2 [file gmd-2018-119-supplement.zip › geant4_codes/RREA_characteristics/GEANT4_cluster/code/src/src/Settings.cc]

#include "G4UnitsTable.hh"
#include "Settings.hh"
#include "G4SystemOfUnits.hh"

// ....oooOO0OOooo........oooOO0OOooo........oooOO0OOooo........oooOO0OOooo......
namespace Settings
{
    // All these variables are put here to be shared amounts source files
    // (not very c++ standard but easier to implement)

    G4double ENER_THRES = 990.; // eV
    G4String PHYSLIST = "O1";

    int NB_LAUNCHED = 0; // initialization
    int Rand_seed = 779;
    double MIN_STEP = 1.; // um
    double PRIMARY_ENERGY = 0.1; // MeV
    double LOG10_EPSTOL = -5.;
    double EFIELD = 8.e5; // V/m
    int TYPE = -1;              // chosen value
    double TIME_LIMIT = 522.; //nanosecond
    const double EF_SIGN = -1.;
    G4double DR_OVER_R = 0.0005;
    G4double STEP_MAX = 1.*mm;
}
