# Supplementary material for: Evaluation of Monte Carlo tools for high energy atmospheric physics II: relativistic runaway electron avalanches
Source: Copernicus journal article supplement (doi:10.5194/gmd-2018-119), 2018-06-14
Supplement: Supplementary file 2 [file gmd-2018-119-supplement.zip › geant4_codes/RREA_characteristics/GEANT4_cluster/plot_RREA_photon_spectrum.m]

clear all
close all
clc


filename='/scratch/output/RREA_char/GEANT4O4_800000.txt';


data=importdata(filename);

times=data(:,8);
energies=data(:,9);

energies=energies(times==1.6000e-06);

bins=logspace(log10(min(energies)),log10(max(energies)),120);
[n,xout]=hist(energies,bins);

n=n./gradient(xout);


loglog(xout,n)

xlabel('Energy (keV)')
ylabel('Counts per bin (keV-1)')
grid on
