# Supplementary material for: Evaluation of Monte Carlo tools for high energy atmospheric physics II: relativistic runaway electron avalanches
Source: Copernicus journal article supplement (doi:10.5194/gmd-2018-119), 2018-06-14
Supplement: Supplementary file 2 [file gmd-2018-119-supplement.zip › geant4_codes/RREA_characteristics/GEANT4_cluster/test_methods.m]

clear all
close all
clc


nb_elec_ini =  [100 ];
E_field =      [8e5 ];
T_simu_max =   [200    400    600 ]; % ns

run_duration = [77     3429   ];
output_size =  [0.139  6.5    208 ] ;% MB
