# Supplementary material for: Evaluation of Monte Carlo tools for high energy atmospheric physics II: relativistic runaway electron avalanches
Source: Copernicus journal article supplement (doi:10.5194/gmd-2018-119), 2018-06-14
Supplement: Supplementary file 2 [file gmd-2018-119-supplement.zip › geant4_codes/RREA_characteristics/matlab_codes/GEANT4_analyse/friction_curve]

1.81673e+2  2.34403e+5
2.88379e+2  2.22085e+5
4.92340e+2  1.88882e+5
8.40504e+2  1.53231e+5
1.24005e+3  1.25151e+5
1.58120e+3  1.07886e+5
2.11658e+3  8.87126e+4
3.01062e+3  6.86483e+4
4.33479e+3  5.38438e+4
6.24114e+3  4.11073e+4
9.78382e+3  3.01384e+4
1.29374e+4  2.36389e+4
2.12906e+4  1.64204e+4
3.46130e+4  1.12534e+4
6.05303e+4  7.60884e+3
9.96141e+4  5.35720e+3
1.65947e+5  3.90130e+3
3.16017e+5  2.80297e+3
6.71489e+5  2.21337e+3
1.16058e+6  2.06895e+3
2.15800e+6  2.09706e+3
3.77583e+6  2.11126e+3
5.85027e+6  2.19849e+3
1.07478e+7  2.43266e+3
2.23000e+7  2.82195e+3
5.10021e+7  3.52576e+3
9.83872e+7  4.49518e+3
2.01732e+8  6.55918e+3
3.28268e+8  9.06795e+3
4.18757e+8  1.08069e+4
6.25796e+8  1.46409e+4
7.06837e+8  1.65316e+4
