# Supplementary material for: Evaluation of Monte Carlo tools for high energy atmospheric physics II: relativistic runaway electron avalanches
Source: Copernicus journal article supplement (doi:10.5194/gmd-2018-119), 2018-06-14
Supplement: Supplementary file 2 [file gmd-2018-119-supplement.zip › matlab_processing/photon_electron_ratio_code_compa.m]

clearvars
close all
clc

set(0,'defaultAxesFontSize',12)

global corr_dist;
corr_dist = [256 128 83 77 57 53 48 44 41 38 36 33 33] ;


global nb_fig;
nb_fig=0;
global colors;
colors={'r','g','b','k','m','r','g','b','k','m','r','g','b','k','m','r','g','b','k','m','r','g','b','k','m'};

global path_to_processed_files;
path_to_processed_files = '/scratch/HEAP_data/matlab_structs/';


load([path_to_processed_files 'GRRR' '_data.mat']);

%%

plot_elec_phot_ratio('REAM');
plot_elec_phot_ratio('GEANT4O1');
plot_elec_phot_ratio('GEANT4O4');


%%

function plot_elec_phot_ratio(codename)
global path_to_processed_files;
global corr_dist;

removing_map = [0 1 0 3 0 1 1 1 1 1 1 0 1];

% nb_fig is also code number

load([path_to_processed_files codename '_data.mat']);

fields = HEAP_data_RREA.field_list;

stop_times = HEAP_data_RREA.stop_times;
% record_times = HEAP_data_RREA.record_times;
record_distances = HEAP_data_RREA.record_distances;
stop_dists = corr_dist;

for i_field=1:HEAP_data_RREA.nb_fields
    
    record_distances = record_distances(record_distances <= stop_dists(i_field));
    
    field = fields(i_field);
    
    %     ener_elec = HEAP_data_RREA.(codename).(['field_' num2str(field)]).electron.energy;
    %     ener_phot = HEAP_data_RREA.(codename).(['field_' num2str(field)]).photon.energy;
    
    dist_elec = HEAP_data_RREA.(codename).(['field_' num2str(field)]).electron.z;
    dist_phot = HEAP_data_RREA.(codename).(['field_' num2str(field)]).photon.z;
    
    time_phot = HEAP_data_RREA.(codename).(['field_' num2str(field)]).photon.time*1e-9;
    time_elec = HEAP_data_RREA.(codename).(['field_' num2str(field)]).electron.time*1e-9;
    
    ratio=[];
    nb_elec=[];
    nb_phot=[];
    
    stop_time = stop_times(i_field);
    
    for i_dist = 1:length(record_distances)
        
        rec_dist = record_distances(i_dist);
        
        to_be_kept_elec = (dist_elec >= 0.999*rec_dist & dist_elec <= 1.001*rec_dist );
        to_be_kept_phot = (dist_phot >= 0.999*rec_dist & dist_phot <= 1.001*rec_dist );
%       to_be_kept_elec = (dist_elec >= 0.999*rec_dist & dist_elec <= 1.001*rec_dist & time_elec <= stop_time);
%       to_be_kept_phot = (dist_phot >= 0.999*rec_dist & dist_phot <= 1.001*rec_dist & time_phot <= stop_time);
        
        nb_elec(i_dist) = sum(to_be_kept_elec);
        nb_phot(i_dist) = sum(to_be_kept_phot);
        
        ratio(i_dist) = nb_elec(i_dist) / nb_phot(i_dist);
        
    end
    
    nb_to_remove = removing_map(i_field);
    
    figure(i_field)
    
    plot(record_distances(1:end-nb_to_remove),ratio(1:end-nb_to_remove),'+-')
    
    hold on
    
    xlabel('Record distance (meter)','interpreter','latex')
    ylabel('Electron to photon ratio','interpreter','latex')
    
    
    grid on
    title(['E-field of ' num2str(fields(i_field)/1e5) '.$10^5$ V/m'],'interpreter','latex');
    
    if contains(codename,'GEANT4O1') && i_field==13
        legend('GEANT4O1','Location','northwest','interpreter','latex')
    else
        legend('REAM','GEANT4O1','GEANT4O4','Location','northwest','interpreter','latex')  
    end
    
    set(gcf, 'Units', 'Normalized', 'OuterPosition', [0, 0.5, 0.5, 0.5]);
    
    
    figname = ['./generated_figures/electron_to_photon_ratio/code_comparison/elec_phot_ratio_' num2str(fields(i_field)/1e5) 'e5'];
    savefig([figname '.fig'])
    print(figname,'-depsc')
    
end


clear HEAP_data_RREA;

end
